# Supplementary material for: Targeting INHBA in Ovarian Cancer Cells Suppresses Cancer Xenograft Growth by Attenuating Stromal Fibroblast Activation
Source: Dis Markers. 2019 Nov 11;2019:7275289. doi: 10.1155/2019/7275289 (PMC6885285; doi:10.1155/2019/7275289)
Supplement: Supplementary Materials — Supply Table 1: listing of genes associated with INHBA (Spearman′s correlation > 0.8) in ovarian serous cystadenocarcinoma (TCGA, provisional). Supply Table 2: KEGG pathway analysis with genes associated with INHBA. Supply Table 3: Gene Ontology analysis with genes associated with INHBA. Supply Table 4: listing of the genes included in the Yoshihara's 141-stromal signature (141 genes). Supply Table 5: ssGSEA scores of Yoshihara's 141-stromal signature in GSE9891, GSE26193, GSE51088, and TCGA dataset. [file 7275289.f1.xlsx]

## Sheet: Sheet1
Supply table 1: The list of genes associated with INHBA (Spearman's Correlation > 0.8) in Ovarian Serous Cystadenocarcinoma (TCGA, Provisional).
Correlated Gene	Cytoband	Spearman's Correlation	p-Value	q-Value	Species	Gene Name
FAP	2q24.2	0.912	1.03e-214	1.77e-210	Homo sapiens	fibroblast activation protein alpha(FAP)
THBS2	6q27	0.91	6.83e-212	5.86e-208	Homo sapiens	thrombospondin 2(THBS2)
COL5A2	2q32.2	0.894	1.87e-193	1.07e-189	Homo sapiens	collagen type V alpha 2 chain(COL5A2)
VCAN	5q14.2-q14.3	0.871	7.68e-172	3.29e-168	Homo sapiens	versican(VCAN)
COL11A1	1p21.1	0.868	1.09e-168	3.75e-165	Homo sapiens	collagen type XI alpha 1 chain(COL11A1)
POSTN	13q13.3	0.865	1.33e-166	3.8e-163	Homo sapiens	periostin(POSTN)
ITGA11	15q23	0.86	2.24e-162	5.48e-159	Homo sapiens	integrin subunit alpha 11(ITGA11)
LUM	12q21.33	0.858	4.05e-161	8.69e-158	Homo sapiens	lumican(LUM)
FN1	2q35	0.857	1.63e-160	3.1e-157	Homo sapiens	fibronectin 1(FN1)
SFRP2	4q31.3	0.847	4.4e-153	7.56e-150	Homo sapiens	secreted frizzled related protein 2(SFRP2)
CTSK	1q21.3	0.843	1.13e-149	1.77e-146	Homo sapiens	cathepsin K(CTSK)
ADAM12	10q26.2	0.835	1.61e-144	2.31e-141	Homo sapiens	ADAM metallopeptidase domain 12(ADAM12)
COL1A1	17q21.33	0.832	2.53e-142	3.34e-139	Homo sapiens	collagen type I alpha 1 chain(COL1A1)
ITGBL1	13q33.1	0.829	7.2e-141	8.82e-138	Homo sapiens	integrin subunit beta like 1(ITGBL1)
LRRC15	3q29	0.826	5.12e-139	5.86e-136	Homo sapiens	leucine rich repeat containing 15(LRRC15)
COL5A1	9q34.3	0.825	1.9e-138	2.03e-135	Homo sapiens	collagen type V alpha 1 chain(COL5A1)
GREM1	15q13.3	0.82	4.29e-135	4.33e-132	Homo sapiens	gremlin 1, DAN family BMP antagonist(GREM1)
PRRX1	1q24.2	0.813	3.06e-131	2.92e-128	Homo sapiens	paired related homeobox 1(PRRX1)
SERPINF1	17p13.3	0.812	2.64e-130	2.39e-127	Homo sapiens	serpin family F member 1(SERPINF1)
ECM1	1q21.2	0.809	1.43e-128	1.23e-125	Homo sapiens	extracellular matrix protein 1(ECM1)
COL8A1	3q12.1	0.806	2.77e-127	2.26e-124	Homo sapiens	collagen type VIII alpha 1 chain(COL8A1)
ALPK2	18q21.31-q21.32	0.806	5.26e-127	4.1e-124	Homo sapiens	alpha kinase 2(ALPK2)
BHLHE22	8q12.3	0.802	6.04e-125	4.51e-122	Homo sapiens	basic helix-loop-helix family member e22(BHLHE22)

## Sheet: Sheet2
Supply table 2: KEGG pathway analysis with genes associated with INHBA.
Term	Database	ID	Input number	Background number	P-Value	Corrected P-Value	Input	Hyperlink
ECM-receptor interaction	KEGG PATHWAY	hsa04512	4	82	1.75e-07	3e-06	22801|7058|2335|1277	http://www.genome.jp/kegg-bin/show_pathway?hsa04512/hsa:1277%09red/hsa:22801%09red/hsa:7058%09red/hsa:2335%09red
Protein digestion and absorption	KEGG PATHWAY	hsa04974	4	90	2.5e-07	3e-06	1290|1289|1301|1277	http://www.genome.jp/kegg-bin/show_pathway?hsa04974/hsa:1277%09red/hsa:1290%09red/hsa:1289%09red/hsa:1301%09red
Focal adhesion	KEGG PATHWAY	hsa04510	4	203	5.83e-06	4.67e-05	22801|7058|2335|1277	http://www.genome.jp/kegg-bin/show_pathway?hsa04510/hsa:1277%09red/hsa:22801%09red/hsa:7058%09red/hsa:2335%09red
PI3K-Akt signaling pathway	KEGG PATHWAY	hsa04151	4	342	4.37e-05	0.000262151	22801|7058|2335|1277	http://www.genome.jp/kegg-bin/show_pathway?hsa04151/hsa:1277%09red/hsa:22801%09red/hsa:7058%09red/hsa:2335%09red
Amoebiasis	KEGG PATHWAY	hsa05146	2	100	0.00158998	0.00648356	2335|1277	http://www.genome.jp/kegg-bin/show_pathway?hsa05146/hsa:1277%09red/hsa:2335%09red
AGE-RAGE signaling pathway in diabetic complications	KEGG PATHWAY	hsa04933	2	101	0.00162089	0.00648356	2335|1277	http://www.genome.jp/kegg-bin/show_pathway?hsa04933/hsa:1277%09red/hsa:2335%09red
Wnt signaling pathway	KEGG PATHWAY	hsa04310	2	143	0.00317429	0.0108833	5176|6423	http://www.genome.jp/kegg-bin/show_pathway?hsa04310/hsa:6423%09red/hsa:5176%09red
Proteoglycans in cancer	KEGG PATHWAY	hsa05205	2	205	0.00634334	0.0185286	4060|2335	http://www.genome.jp/kegg-bin/show_pathway?hsa05205/hsa:4060%09red/hsa:2335%09red
Regulation of actin cytoskeleton	KEGG PATHWAY	hsa04810	2	215	0.00694822	0.0185286	22801|2335	http://www.genome.jp/kegg-bin/show_pathway?hsa04810/hsa:22801%09red/hsa:2335%09red
Malaria	KEGG PATHWAY	hsa05144	1	49	0.0285185	0.0684443	7058	http://www.genome.jp/kegg-bin/show_pathway?hsa05144/hsa:7058%09red
Arrhythmogenic right ventricular cardiomyopathy (ARVC)	KEGG PATHWAY	hsa05412	1	74	0.0424843	0.0778068	22801	http://www.genome.jp/kegg-bin/show_pathway?hsa05412/hsa:22801%09red
Bacterial invasion of epithelial cells	KEGG PATHWAY	hsa05100	1	78	0.0447009	0.0778068	2335	http://www.genome.jp/kegg-bin/show_pathway?hsa05100/hsa:2335%09red
Hypertrophic cardiomyopathy (HCM)	KEGG PATHWAY	hsa05410	1	83	0.0474648	0.0778068	22801	http://www.genome.jp/kegg-bin/show_pathway?hsa05410/hsa:22801%09red
Small cell lung cancer	KEGG PATHWAY	hsa05222	1	86	0.0491195	0.0778068	2335	http://www.genome.jp/kegg-bin/show_pathway?hsa05222/hsa:2335%09red

## Sheet: Sheet3
Supply table 3: Gene Ontology analysis with genes associated with INHBA.
Term	Database	ID	Input number	Background number	P-Value	Corrected P-Value	Hyperlink
extracellular matrix organization	Gene Ontology	GO:0030198	14	323	5.7e-24	4.78e-21	http://amigo.geneontology.org/cgi-bin/amigo/term_details?term=GO:0030198
extracellular structure organization	Gene Ontology	GO:0043062	14	324	5.94e-24	4.78e-21	http://amigo.geneontology.org/cgi-bin/amigo/term_details?term=GO:0043062
extracellular matrix	Gene Ontology	GO:0031012	13	423	2.85e-20	1.53e-17	http://amigo.geneontology.org/cgi-bin/amigo/term_details?term=GO:0031012
proteinaceous extracellular matrix	Gene Ontology	GO:0005578	12	354	3.79e-19	1.53e-16	http://amigo.geneontology.org/cgi-bin/amigo/term_details?term=GO:0005578
extracellular matrix component	Gene Ontology	GO:0044420	9	125	3.33e-17	1.07e-14	http://amigo.geneontology.org/cgi-bin/amigo/term_details?term=GO:0044420
collagen fibril organization	Gene Ontology	GO:0030199	7	38	3.51e-16	9.42e-14	http://amigo.geneontology.org/cgi-bin/amigo/term_details?term=GO:0030199
biological adhesion	Gene Ontology	GO:0022610	14	1428	3.82e-15	8.79e-13	http://amigo.geneontology.org/cgi-bin/amigo/term_details?term=GO:0022610
extracellular region	Gene Ontology	GO:0005576	19	4424	4.47e-15	8.99e-13	http://amigo.geneontology.org/cgi-bin/amigo/term_details?term=GO:0005576
blood vessel development	Gene Ontology	GO:0001568	11	573	7.16e-15	1.19e-12	http://amigo.geneontology.org/cgi-bin/amigo/term_details?term=GO:0001568
anatomical structure formation involved in morphogenesis	Gene Ontology	GO:0048646	13	1129	7.36e-15	1.19e-12	http://amigo.geneontology.org/cgi-bin/amigo/term_details?term=GO:0048646
complex of collagen trimers	Gene Ontology	GO:0098644	6	23	8.64e-15	1.26e-12	http://amigo.geneontology.org/cgi-bin/amigo/term_details?term=GO:0098644
vasculature development	Gene Ontology	GO:0001944	11	593	1.03e-14	1.39e-12	http://amigo.geneontology.org/cgi-bin/amigo/term_details?term=GO:0001944
collagen catabolic process	Gene Ontology	GO:0030574	7	67	1.38e-14	1.71e-12	http://amigo.geneontology.org/cgi-bin/amigo/term_details?term=GO:0030574
multicellular organism catabolic process	Gene Ontology	GO:0044243	7	72	2.22e-14	2.55e-12	http://amigo.geneontology.org/cgi-bin/amigo/term_details?term=GO:0044243
cardiovascular system development	Gene Ontology	GO:0072358	12	919	2.68e-14	2.7e-12	http://amigo.geneontology.org/cgi-bin/amigo/term_details?term=GO:0072358
circulatory system development	Gene Ontology	GO:0072359	12	919	2.68e-14	2.7e-12	http://amigo.geneontology.org/cgi-bin/amigo/term_details?term=GO:0072359
system development	Gene Ontology	GO:0048731	18	4206	5.65e-14	5.35e-12	http://amigo.geneontology.org/cgi-bin/amigo/term_details?term=GO:0048731
anatomical structure development	Gene Ontology	GO:0048856	19	5313	1.31e-13	1.14e-11	http://amigo.geneontology.org/cgi-bin/amigo/term_details?term=GO:0048856
cell adhesion	Gene Ontology	GO:0007155	13	1421	1.34e-13	1.14e-11	http://amigo.geneontology.org/cgi-bin/amigo/term_details?term=GO:0007155
extracellular region part	Gene Ontology	GO:0044421	17	3743	2.14e-13	1.72e-11	http://amigo.geneontology.org/cgi-bin/amigo/term_details?term=GO:0044421
banded collagen fibril	Gene Ontology	GO:0098643	5	12	2.5e-13	1.83e-11	http://amigo.geneontology.org/cgi-bin/amigo/term_details?term=GO:0098643
fibrillar collagen trimer	Gene Ontology	GO:0005583	5	12	2.5e-13	1.83e-11	http://amigo.geneontology.org/cgi-bin/amigo/term_details?term=GO:0005583
anatomical structure morphogenesis	Gene Ontology	GO:0009653	15	2513	3.22e-13	2.25e-11	http://amigo.geneontology.org/cgi-bin/amigo/term_details?term=GO:0009653
single-organism developmental process	Gene Ontology	GO:0044767	19	5604	3.48e-13	2.33e-11	http://amigo.geneontology.org/cgi-bin/amigo/term_details?term=GO:0044767
ossification	Gene Ontology	GO:0001503	9	363	3.61e-13	2.33e-11	http://amigo.geneontology.org/cgi-bin/amigo/term_details?term=GO:0001503
collagen metabolic process	Gene Ontology	GO:0032963	7	111	3.97e-13	2.46e-11	http://amigo.geneontology.org/cgi-bin/amigo/term_details?term=GO:0032963
developmental process	Gene Ontology	GO:0032502	19	5693	4.64e-13	2.76e-11	http://amigo.geneontology.org/cgi-bin/amigo/term_details?term=GO:0032502
cell migration	Gene Ontology	GO:0016477	12	1177	4.8e-13	2.76e-11	http://amigo.geneontology.org/cgi-bin/amigo/term_details?term=GO:0016477
multicellular organism development	Gene Ontology	GO:0007275	18	4770	5.03e-13	2.79e-11	http://amigo.geneontology.org/cgi-bin/amigo/term_details?term=GO:0007275
multicellular organismal macromolecule metabolic process	Gene Ontology	GO:0044259	7	116	5.34e-13	2.87e-11	http://amigo.geneontology.org/cgi-bin/amigo/term_details?term=GO:0044259
single-multicellular organism process	Gene Ontology	GO:0044707	19	5822	7e-13	3.64e-11	http://amigo.geneontology.org/cgi-bin/amigo/term_details?term=GO:0044707
multicellular organism metabolic process	Gene Ontology	GO:0044236	7	129	1.09e-12	5.5e-11	http://amigo.geneontology.org/cgi-bin/amigo/term_details?term=GO:0044236
cell motility	Gene Ontology	GO:0048870	12	1288	1.37e-12	6.47e-11	http://amigo.geneontology.org/cgi-bin/amigo/term_details?term=GO:0048870
localization of cell	Gene Ontology	GO:0051674	12	1288	1.37e-12	6.47e-11	http://amigo.geneontology.org/cgi-bin/amigo/term_details?term=GO:0051674
skeletal system development	Gene Ontology	GO:0001501	9	482	4.33e-12	1.99e-10	http://amigo.geneontology.org/cgi-bin/amigo/term_details?term=GO:0001501
blood vessel morphogenesis	Gene Ontology	GO:0048514	9	487	4.74e-12	2.12e-10	http://amigo.geneontology.org/cgi-bin/amigo/term_details?term=GO:0048514
extracellular matrix structural constituent	Gene Ontology	GO:0005201	6	76	6.25e-12	2.72e-10	http://amigo.geneontology.org/cgi-bin/amigo/term_details?term=GO:0005201
locomotion	Gene Ontology	GO:0040011	12	1480	6.83e-12	2.89e-10	http://amigo.geneontology.org/cgi-bin/amigo/term_details?term=GO:0040011
multicellular organismal process	Gene Ontology	GO:0032501	19	6781	1.13e-11	4.68e-10	http://amigo.geneontology.org/cgi-bin/amigo/term_details?term=GO:0032501
collagen trimer	Gene Ontology	GO:0005581	6	88	1.45e-11	5.82e-10	http://amigo.geneontology.org/cgi-bin/amigo/term_details?term=GO:0005581
cellular component organization	Gene Ontology	GO:0016043	18	5863	1.76e-11	6.93e-10	http://amigo.geneontology.org/cgi-bin/amigo/term_details?term=GO:0016043
cellular component organization or biogenesis	Gene Ontology	GO:0071840	18	6012	2.71e-11	1.04e-09	http://amigo.geneontology.org/cgi-bin/amigo/term_details?term=GO:0071840
movement of cell or subcellular component	Gene Ontology	GO:0006928	12	1715	3.74e-11	1.4e-09	http://amigo.geneontology.org/cgi-bin/amigo/term_details?term=GO:0006928
tissue development	Gene Ontology	GO:0009888	12	1723	3.94e-11	1.44e-09	http://amigo.geneontology.org/cgi-bin/amigo/term_details?term=GO:0009888
cell differentiation	Gene Ontology	GO:0030154	15	3519	4.04e-11	1.45e-09	http://amigo.geneontology.org/cgi-bin/amigo/term_details?term=GO:0030154
extracellular space	Gene Ontology	GO:0005615	11	1330	5.71e-11	2e-09	http://amigo.geneontology.org/cgi-bin/amigo/term_details?term=GO:0005615
connective tissue development	Gene Ontology	GO:0061448	7	232	5.84e-11	2e-09	http://amigo.geneontology.org/cgi-bin/amigo/term_details?term=GO:0061448
angiogenesis	Gene Ontology	GO:0001525	8	415	6.52e-11	2.19e-09	http://amigo.geneontology.org/cgi-bin/amigo/term_details?term=GO:0001525
formation of primary germ layer	Gene Ontology	GO:0001704	6	117	7.47e-11	2.45e-09	http://amigo.geneontology.org/cgi-bin/amigo/term_details?term=GO:0001704
endodermal cell differentiation	Gene Ontology	GO:0035987	5	45	8.44e-11	2.72e-09	http://amigo.geneontology.org/cgi-bin/amigo/term_details?term=GO:0035987
regulation of anatomical structure morphogenesis	Gene Ontology	GO:0022603	10	1001	9.11e-11	2.88e-09	http://amigo.geneontology.org/cgi-bin/amigo/term_details?term=GO:0022603
protein binding	Gene Ontology	GO:0005515	21	10621	1.3e-10	4.04e-09	http://amigo.geneontology.org/cgi-bin/amigo/term_details?term=GO:0005515
cellular developmental process	Gene Ontology	GO:0048869	15	3837	1.38e-10	4.2e-09	http://amigo.geneontology.org/cgi-bin/amigo/term_details?term=GO:0048869
endoderm formation	Gene Ontology	GO:0001706	5	54	1.99e-10	5.93e-09	http://amigo.geneontology.org/cgi-bin/amigo/term_details?term=GO:0001706
regulation of multicellular organismal process	Gene Ontology	GO:0051239	13	2581	2.3e-10	6.74e-09	http://amigo.geneontology.org/cgi-bin/amigo/term_details?term=GO:0051239
collagen binding	Gene Ontology	GO:0005518	5	65	4.79e-10	1.38e-08	http://amigo.geneontology.org/cgi-bin/amigo/term_details?term=GO:0005518
single-organism cellular process	Gene Ontology	GO:0044763	21	11494	6.46e-10	1.82e-08	http://amigo.geneontology.org/cgi-bin/amigo/term_details?term=GO:0044763
embryonic morphogenesis	Gene Ontology	GO:0048598	8	561	6.77e-10	1.88e-08	http://amigo.geneontology.org/cgi-bin/amigo/term_details?term=GO:0048598
regulation of cellular component organization	Gene Ontology	GO:0051128	12	2218	7.08e-10	1.93e-08	http://amigo.geneontology.org/cgi-bin/amigo/term_details?term=GO:0051128
gastrulation	Gene Ontology	GO:0007369	6	176	7.99e-10	2.14e-08	http://amigo.geneontology.org/cgi-bin/amigo/term_details?term=GO:0007369
cartilage development	Gene Ontology	GO:0051216	6	179	8.81e-10	2.33e-08	http://amigo.geneontology.org/cgi-bin/amigo/term_details?term=GO:0051216
endoderm development	Gene Ontology	GO:0007492	5	75	9.47e-10	2.46e-08	http://amigo.geneontology.org/cgi-bin/amigo/term_details?term=GO:0007492
macromolecule metabolic process	Gene Ontology	GO:0043170	19	8738	1.11e-09	2.83e-08	http://amigo.geneontology.org/cgi-bin/amigo/term_details?term=GO:0043170
embryo development	Gene Ontology	GO:0009790	9	937	1.42e-09	3.57e-08	http://amigo.geneontology.org/cgi-bin/amigo/term_details?term=GO:0009790
binding	Gene Ontology	GO:0005488	22	13918	1.45e-09	3.58e-08	http://amigo.geneontology.org/cgi-bin/amigo/term_details?term=GO:0005488
negative regulation of multicellular organismal process	Gene Ontology	GO:0051241	9	980	2.09e-09	5.1e-08	http://amigo.geneontology.org/cgi-bin/amigo/term_details?term=GO:0051241
regulation of cell migration	Gene Ontology	GO:0030334	8	665	2.52e-09	6.06e-08	http://amigo.geneontology.org/cgi-bin/amigo/term_details?term=GO:0030334
basement membrane	Gene Ontology	GO:0005604	5	93	2.66e-09	6.29e-08	http://amigo.geneontology.org/cgi-bin/amigo/term_details?term=GO:0005604
cellular process	Gene Ontology	GO:0009987	22	14647	4.33e-09	1e-07	http://amigo.geneontology.org/cgi-bin/amigo/term_details?term=GO:0009987
regulation of cell motility	Gene Ontology	GO:2000145	8	714	4.36e-09	1e-07	http://amigo.geneontology.org/cgi-bin/amigo/term_details?term=GO:2000145
single-organism process	Gene Ontology	GO:0044699	21	12728	5.05e-09	1.14e-07	http://amigo.geneontology.org/cgi-bin/amigo/term_details?term=GO:0044699
regulation of locomotion	Gene Ontology	GO:0040012	8	743	5.93e-09	1.33e-07	http://amigo.geneontology.org/cgi-bin/amigo/term_details?term=GO:0040012
protein complex binding	Gene Ontology	GO:0032403	8	754	6.64e-09	1.46e-07	http://amigo.geneontology.org/cgi-bin/amigo/term_details?term=GO:0032403
regulation of cellular component movement	Gene Ontology	GO:0051270	8	773	8.04e-09	1.75e-07	http://amigo.geneontology.org/cgi-bin/amigo/term_details?term=GO:0051270
negative regulation of developmental process	Gene Ontology	GO:0051093	8	808	1.13e-08	2.43e-07	http://amigo.geneontology.org/cgi-bin/amigo/term_details?term=GO:0051093
regulation of multicellular organismal development	Gene Ontology	GO:2000026	10	1666	1.19e-08	2.51e-07	http://amigo.geneontology.org/cgi-bin/amigo/term_details?term=GO:2000026
regulation of developmental process	Gene Ontology	GO:0050793	11	2217	1.2e-08	2.51e-07	http://amigo.geneontology.org/cgi-bin/amigo/term_details?term=GO:0050793
cell-substrate adhesion	Gene Ontology	GO:0031589	6	302	1.85e-08	3.83e-07	http://amigo.geneontology.org/cgi-bin/amigo/term_details?term=GO:0031589
organic substance metabolic process	Gene Ontology	GO:0071704	19	10277	1.99e-08	4.06e-07	http://amigo.geneontology.org/cgi-bin/amigo/term_details?term=GO:0071704
negative regulation of gastrulation	Gene Ontology	GO:2000542	3	7	2.02e-08	4.07e-07	http://amigo.geneontology.org/cgi-bin/amigo/term_details?term=GO:2000542
animal organ development	Gene Ontology	GO:0048513	12	3087	2.93e-08	5.82e-07	http://amigo.geneontology.org/cgi-bin/amigo/term_details?term=GO:0048513
metabolic process	Gene Ontology	GO:0008152	19	10642	3.69e-08	7.25e-07	http://amigo.geneontology.org/cgi-bin/amigo/term_details?term=GO:0008152
organ morphogenesis	Gene Ontology	GO:0009887	8	963	4.33e-08	8.41e-07	http://amigo.geneontology.org/cgi-bin/amigo/term_details?term=GO:0009887
positive regulation of multicellular organismal process	Gene Ontology	GO:0051240	9	1407	4.65e-08	8.92e-07	http://amigo.geneontology.org/cgi-bin/amigo/term_details?term=GO:0051240
regulation of cell-substrate adhesion	Gene Ontology	GO:0010810	5	174	5.49e-08	1.04e-06	http://amigo.geneontology.org/cgi-bin/amigo/term_details?term=GO:0010810
regulation of cell differentiation	Gene Ontology	GO:0045595	9	1484	7.32e-08	1.37e-06	http://amigo.geneontology.org/cgi-bin/amigo/term_details?term=GO:0045595
cell adhesion molecule binding	Gene Ontology	GO:0050839	5	187	7.79e-08	1.44e-06	http://amigo.geneontology.org/cgi-bin/amigo/term_details?term=GO:0050839
positive regulation of biological process	Gene Ontology	GO:0048518	14	5067	7.93e-08	1.45e-06	http://amigo.geneontology.org/cgi-bin/amigo/term_details?term=GO:0048518
endoplasmic reticulum lumen	Gene Ontology	GO:0005788	5	200	1.08e-07	1.95e-06	http://amigo.geneontology.org/cgi-bin/amigo/term_details?term=GO:0005788
glycosaminoglycan binding	Gene Ontology	GO:0005539	5	202	1.13e-07	2.03e-06	http://amigo.geneontology.org/cgi-bin/amigo/term_details?term=GO:0005539
skeletal system morphogenesis	Gene Ontology	GO:0048705	5	203	1.16e-07	2.05e-06	http://amigo.geneontology.org/cgi-bin/amigo/term_details?term=GO:0048705
intracellular organelle lumen	Gene Ontology	GO:0070013	13	4356	1.31e-07	2.24e-06	http://amigo.geneontology.org/cgi-bin/amigo/term_details?term=GO:0070013
membrane-enclosed lumen	Gene Ontology	GO:0031974	13	4357	1.31e-07	2.24e-06	http://amigo.geneontology.org/cgi-bin/amigo/term_details?term=GO:0031974
organelle lumen	Gene Ontology	GO:0043233	13	4357	1.31e-07	2.24e-06	http://amigo.geneontology.org/cgi-bin/amigo/term_details?term=GO:0043233
regulation of angiogenesis	Gene Ontology	GO:0045765	5	212	1.43e-07	2.43e-06	http://amigo.geneontology.org/cgi-bin/amigo/term_details?term=GO:0045765
negative regulation of biological process	Gene Ontology	GO:0048519	13	4494	1.89e-07	3.17e-06	http://amigo.geneontology.org/cgi-bin/amigo/term_details?term=GO:0048519
positive regulation of cellular process	Gene Ontology	GO:0048522	13	4559	2.24e-07	3.71e-06	http://amigo.geneontology.org/cgi-bin/amigo/term_details?term=GO:0048522
regulation of vasculature development	Gene Ontology	GO:1901342	5	233	2.26e-07	3.72e-06	http://amigo.geneontology.org/cgi-bin/amigo/term_details?term=GO:1901342
single-organism catabolic process	Gene Ontology	GO:0044712	7	805	2.65e-07	4.31e-06	http://amigo.geneontology.org/cgi-bin/amigo/term_details?term=GO:0044712
endomembrane system	Gene Ontology	GO:0012505	12	3788	2.8e-07	4.49e-06	http://amigo.geneontology.org/cgi-bin/amigo/term_details?term=GO:0012505
macromolecular complex binding	Gene Ontology	GO:0044877	8	1232	2.81e-07	4.49e-06	http://amigo.geneontology.org/cgi-bin/amigo/term_details?term=GO:0044877
sensory organ morphogenesis	Gene Ontology	GO:0090596	5	245	2.89e-07	4.56e-06	http://amigo.geneontology.org/cgi-bin/amigo/term_details?term=GO:0090596
regulation of cell development	Gene Ontology	GO:0060284	7	818	2.95e-07	4.61e-06	http://amigo.geneontology.org/cgi-bin/amigo/term_details?term=GO:0060284
regulation of biological process	Gene Ontology	GO:0050789	18	10509	3.2e-07	4.95e-06	http://amigo.geneontology.org/cgi-bin/amigo/term_details?term=GO:0050789
sensory organ development	Gene Ontology	GO:0007423	6	500	3.45e-07	5.29e-06	http://amigo.geneontology.org/cgi-bin/amigo/term_details?term=GO:0007423
cell part	Gene Ontology	GO:0044464	21	15776	3.66e-07	5.55e-06	http://amigo.geneontology.org/cgi-bin/amigo/term_details?term=GO:0044464
cell	Gene Ontology	GO:0005623	21	15802	3.78e-07	5.68e-06	http://amigo.geneontology.org/cgi-bin/amigo/term_details?term=GO:0005623
response to stimulus	Gene Ontology	GO:0050896	16	8081	4.77e-07	7.12e-06	http://amigo.geneontology.org/cgi-bin/amigo/term_details?term=GO:0050896
integrin binding	Gene Ontology	GO:0005178	4	107	4.88e-07	7.21e-06	http://amigo.geneontology.org/cgi-bin/amigo/term_details?term=GO:0005178
catabolic process	Gene Ontology	GO:0009056	9	1889	5.59e-07	8.17e-06	http://amigo.geneontology.org/cgi-bin/amigo/term_details?term=GO:0009056
negative regulation of embryonic development	Gene Ontology	GO:0045992	3	26	6.11e-07	8.86e-06	http://amigo.geneontology.org/cgi-bin/amigo/term_details?term=GO:0045992
fibronectin binding	Gene Ontology	GO:0001968	3	27	6.78e-07	9.75e-06	http://amigo.geneontology.org/cgi-bin/amigo/term_details?term=GO:0001968
biological regulation	Gene Ontology	GO:0065007	18	11110	7.9e-07	1.13e-05	http://amigo.geneontology.org/cgi-bin/amigo/term_details?term=GO:0065007
negative regulation of cellular process	Gene Ontology	GO:0048523	12	4171	7.97e-07	1.13e-05	http://amigo.geneontology.org/cgi-bin/amigo/term_details?term=GO:0048523
response to growth factor	Gene Ontology	GO:0070848	6	627	1.27e-06	1.77e-05	http://amigo.geneontology.org/cgi-bin/amigo/term_details?term=GO:0070848
regulation of cellular process	Gene Ontology	GO:0050794	17	9997	1.29e-06	1.77e-05	http://amigo.geneontology.org/cgi-bin/amigo/term_details?term=GO:0050794
regulation of cell adhesion	Gene Ontology	GO:0030155	6	629	1.29e-06	1.77e-05	http://amigo.geneontology.org/cgi-bin/amigo/term_details?term=GO:0030155
regulation of cell morphogenesis involved in differentiation	Gene Ontology	GO:0010769	5	334	1.29e-06	1.77e-05	http://amigo.geneontology.org/cgi-bin/amigo/term_details?term=GO:0010769
regulation of gastrulation	Gene Ontology	GO:0010470	3	35	1.41e-06	1.9e-05	http://amigo.geneontology.org/cgi-bin/amigo/term_details?term=GO:0010470
epithelial cell proliferation	Gene Ontology	GO:0050673	5	341	1.43e-06	1.92e-05	http://amigo.geneontology.org/cgi-bin/amigo/term_details?term=GO:0050673
regulation of response to stimulus	Gene Ontology	GO:0048583	11	3560	1.46e-06	1.94e-05	http://amigo.geneontology.org/cgi-bin/amigo/term_details?term=GO:0048583
response to organic substance	Gene Ontology	GO:0010033	10	2810	1.53e-06	2.02e-05	http://amigo.geneontology.org/cgi-bin/amigo/term_details?term=GO:0010033
cellular response to organic substance	Gene Ontology	GO:0071310	9	2149	1.63e-06	2.14e-05	http://amigo.geneontology.org/cgi-bin/amigo/term_details?term=GO:0071310
protein complex subunit organization	Gene Ontology	GO:0071822	8	1596	1.96e-06	2.54e-05	http://amigo.geneontology.org/cgi-bin/amigo/term_details?term=GO:0071822
intracellular part	Gene Ontology	GO:0044424	19	13428	2.1e-06	2.67e-05	http://amigo.geneontology.org/cgi-bin/amigo/term_details?term=GO:0044424
heparin binding	Gene Ontology	GO:0008201	4	156	2.1e-06	2.67e-05	http://amigo.geneontology.org/cgi-bin/amigo/term_details?term=GO:0008201
membrane-bounded organelle	Gene Ontology	GO:0043227	18	11806	2.1e-06	2.67e-05	http://amigo.geneontology.org/cgi-bin/amigo/term_details?term=GO:0043227
localization	Gene Ontology	GO:0051179	13	5581	2.36e-06	2.97e-05	http://amigo.geneontology.org/cgi-bin/amigo/term_details?term=GO:0051179
positive regulation of developmental process	Gene Ontology	GO:0051094	7	1147	2.77e-06	3.44e-05	http://amigo.geneontology.org/cgi-bin/amigo/term_details?term=GO:0051094
structural molecule activity	Gene Ontology	GO:0005198	6	719	2.78e-06	3.44e-05	http://amigo.geneontology.org/cgi-bin/amigo/term_details?term=GO:0005198
cellular response to endogenous stimulus	Gene Ontology	GO:0071495	7	1170	3.15e-06	3.88e-05	http://amigo.geneontology.org/cgi-bin/amigo/term_details?term=GO:0071495
intracellular	Gene Ontology	GO:0005622	19	13775	3.25e-06	3.96e-05	http://amigo.geneontology.org/cgi-bin/amigo/term_details?term=GO:0005622
intracellular membrane-bounded organelle	Gene Ontology	GO:0043231	17	10674	3.46e-06	4.19e-05	http://amigo.geneontology.org/cgi-bin/amigo/term_details?term=GO:0043231
cellular macromolecule metabolic process	Gene Ontology	GO:0044260	15	8101	3.95e-06	4.75e-05	http://amigo.geneontology.org/cgi-bin/amigo/term_details?term=GO:0044260
extracellular matrix binding	Gene Ontology	GO:0050840	3	51	4.11e-06	4.87e-05	http://amigo.geneontology.org/cgi-bin/amigo/term_details?term=GO:0050840
regulation of localization	Gene Ontology	GO:0032879	9	2405	4.12e-06	4.87e-05	http://amigo.geneontology.org/cgi-bin/amigo/term_details?term=GO:0032879
cell-matrix adhesion	Gene Ontology	GO:0007160	4	192	4.7e-06	5.53e-05	http://amigo.geneontology.org/cgi-bin/amigo/term_details?term=GO:0007160
regulation of establishment of protein localization	Gene Ontology	GO:0070201	6	815	5.67e-06	6.62e-05	http://amigo.geneontology.org/cgi-bin/amigo/term_details?term=GO:0070201
osteoblast differentiation	Gene Ontology	GO:0001649	4	205	6.06e-06	7.02e-05	http://amigo.geneontology.org/cgi-bin/amigo/term_details?term=GO:0001649
cell development	Gene Ontology	GO:0048468	8	1870	6.3e-06	7.24e-05	http://amigo.geneontology.org/cgi-bin/amigo/term_details?term=GO:0048468
organelle	Gene Ontology	GO:0043226	18	12692	6.67e-06	7.61e-05	http://amigo.geneontology.org/cgi-bin/amigo/term_details?term=GO:0043226
cellular response to chemical stimulus	Gene Ontology	GO:0070887	9	2587	7.46e-06	8.46e-05	http://amigo.geneontology.org/cgi-bin/amigo/term_details?term=GO:0070887
cell proliferation	Gene Ontology	GO:0008283	8	1921	7.67e-06	8.64e-05	http://amigo.geneontology.org/cgi-bin/amigo/term_details?term=GO:0008283
sulfur compound binding	Gene Ontology	GO:1901681	4	224	8.54e-06	9.55e-05	http://amigo.geneontology.org/cgi-bin/amigo/term_details?term=GO:1901681
direct ossification	Gene Ontology	GO:0036072	2	6	8.93e-06	9.72e-05	http://amigo.geneontology.org/cgi-bin/amigo/term_details?term=GO:0036072
regulation of endodermal cell differentiation	Gene Ontology	GO:1903224	2	6	8.93e-06	9.72e-05	http://amigo.geneontology.org/cgi-bin/amigo/term_details?term=GO:1903224
intramembranous ossification	Gene Ontology	GO:0001957	2	6	8.93e-06	9.72e-05	http://amigo.geneontology.org/cgi-bin/amigo/term_details?term=GO:0001957
tendon development	Gene Ontology	GO:0035989	2	6	8.93e-06	9.72e-05	http://amigo.geneontology.org/cgi-bin/amigo/term_details?term=GO:0035989
regulation of epithelial to mesenchymal transition	Gene Ontology	GO:0010717	3	67	9.01e-06	9.73e-05	http://amigo.geneontology.org/cgi-bin/amigo/term_details?term=GO:0010717
neurogenesis	Gene Ontology	GO:0022008	7	1396	9.97e-06	0.000107028	http://amigo.geneontology.org/cgi-bin/amigo/term_details?term=GO:0022008
regulation of cell morphogenesis	Gene Ontology	GO:0022604	5	530	1.19e-05	0.000126769	http://amigo.geneontology.org/cgi-bin/amigo/term_details?term=GO:0022604
cellular response to ketone	Gene Ontology	GO:1901655	3	74	1.2e-05	0.000127171	http://amigo.geneontology.org/cgi-bin/amigo/term_details?term=GO:1901655
regulation of protein localization	Gene Ontology	GO:0032880	6	938	1.26e-05	0.000132091	http://amigo.geneontology.org/cgi-bin/amigo/term_details?term=GO:0032880
wound healing	Gene Ontology	GO:0042060	5	537	1.27e-05	0.000132328	http://amigo.geneontology.org/cgi-bin/amigo/term_details?term=GO:0042060
intracellular organelle	Gene Ontology	GO:0043229	17	11680	1.32e-05	0.000136732	http://amigo.geneontology.org/cgi-bin/amigo/term_details?term=GO:0043229
response to external stimulus	Gene Ontology	GO:0009605	8	2106	1.5e-05	0.00015464	http://amigo.geneontology.org/cgi-bin/amigo/term_details?term=GO:0009605
nervous system development	Gene Ontology	GO:0007399	8	2112	1.53e-05	0.000156856	http://amigo.geneontology.org/cgi-bin/amigo/term_details?term=GO:0007399
regulation of cell proliferation	Gene Ontology	GO:0042127	7	1501	1.59e-05	0.000162312	http://amigo.geneontology.org/cgi-bin/amigo/term_details?term=GO:0042127
response to stress	Gene Ontology	GO:0006950	10	3660	1.63e-05	0.00016515	http://amigo.geneontology.org/cgi-bin/amigo/term_details?term=GO:0006950
cytoplasm	Gene Ontology	GO:0005737	16	10469	1.81e-05	0.000182146	http://amigo.geneontology.org/cgi-bin/amigo/term_details?term=GO:0005737
response to endogenous stimulus	Gene Ontology	GO:0009719	7	1544	1.91e-05	0.000189525	http://amigo.geneontology.org/cgi-bin/amigo/term_details?term=GO:0009719
extracellular matrix disassembly	Gene Ontology	GO:0022617	3	87	1.92e-05	0.000189525	http://amigo.geneontology.org/cgi-bin/amigo/term_details?term=GO:0022617
lysosomal lumen	Gene Ontology	GO:0043202	3	87	1.92e-05	0.000189525	http://amigo.geneontology.org/cgi-bin/amigo/term_details?term=GO:0043202
cytoplasmic part	Gene Ontology	GO:0044444	14	7901	1.96e-05	0.000192738	http://amigo.geneontology.org/cgi-bin/amigo/term_details?term=GO:0044444
proteolysis	Gene Ontology	GO:0006508	7	1559	2.03e-05	0.000198329	http://amigo.geneontology.org/cgi-bin/amigo/term_details?term=GO:0006508
bone trabecula formation	Gene Ontology	GO:0060346	2	10	2.1e-05	0.000203939	http://amigo.geneontology.org/cgi-bin/amigo/term_details?term=GO:0060346
cellular response to growth factor stimulus	Gene Ontology	GO:0071363	5	599	2.13e-05	0.000204784	http://amigo.geneontology.org/cgi-bin/amigo/term_details?term=GO:0071363
response to acid chemical	Gene Ontology	GO:0001101	4	284	2.14e-05	0.000204784	http://amigo.geneontology.org/cgi-bin/amigo/term_details?term=GO:0001101
intracellular organelle part	Gene Ontology	GO:0044446	14	7986	2.23e-05	0.000212542	http://amigo.geneontology.org/cgi-bin/amigo/term_details?term=GO:0044446
negative regulation of cell differentiation	Gene Ontology	GO:0045596	5	607	2.27e-05	0.000214719	http://amigo.geneontology.org/cgi-bin/amigo/term_details?term=GO:0045596
chondrocyte differentiation	Gene Ontology	GO:0002062	3	95	2.48e-05	0.000232529	http://amigo.geneontology.org/cgi-bin/amigo/term_details?term=GO:0002062
platelet-derived growth factor binding	Gene Ontology	GO:0048407	2	11	2.48e-05	0.000232529	http://amigo.geneontology.org/cgi-bin/amigo/term_details?term=GO:0048407
organelle part	Gene Ontology	GO:0044422	14	8165	2.9e-05	0.000270335	http://amigo.geneontology.org/cgi-bin/amigo/term_details?term=GO:0044422
response to wounding	Gene Ontology	GO:0009611	5	646	3.05e-05	0.000281783	http://amigo.geneontology.org/cgi-bin/amigo/term_details?term=GO:0009611
single-organism metabolic process	Gene Ontology	GO:0044710	10	3962	3.27e-05	0.000300181	http://amigo.geneontology.org/cgi-bin/amigo/term_details?term=GO:0044710
macromolecular complex subunit organization	Gene Ontology	GO:0043933	8	2348	3.28e-05	0.000300181	http://amigo.geneontology.org/cgi-bin/amigo/term_details?term=GO:0043933
protease binding	Gene Ontology	GO:0002020	3	105	3.31e-05	0.000301253	http://amigo.geneontology.org/cgi-bin/amigo/term_details?term=GO:0002020
bone trabecula morphogenesis	Gene Ontology	GO:0061430	2	13	3.34e-05	0.000302256	http://amigo.geneontology.org/cgi-bin/amigo/term_details?term=GO:0061430
epithelial to mesenchymal transition	Gene Ontology	GO:0001837	3	108	3.59e-05	0.000323288	http://amigo.geneontology.org/cgi-bin/amigo/term_details?term=GO:0001837
response to chemical	Gene Ontology	GO:0042221	10	4014	3.66e-05	0.000327249	http://amigo.geneontology.org/cgi-bin/amigo/term_details?term=GO:0042221
eye development	Gene Ontology	GO:0001654	4	331	3.85e-05	0.000341583	http://amigo.geneontology.org/cgi-bin/amigo/term_details?term=GO:0001654
metal ion binding	Gene Ontology	GO:0046872	10	4039	3.86e-05	0.000341583	http://amigo.geneontology.org/cgi-bin/amigo/term_details?term=GO:0046872
positive regulation of cellular component organization	Gene Ontology	GO:0051130	6	1150	3.92e-05	0.000345197	http://amigo.geneontology.org/cgi-bin/amigo/term_details?term=GO:0051130
vacuolar lumen	Gene Ontology	GO:0005775	3	113	4.1e-05	0.000358694	http://amigo.geneontology.org/cgi-bin/amigo/term_details?term=GO:0005775
cellular response to cytokine stimulus	Gene Ontology	GO:0071345	5	689	4.13e-05	0.000359341	http://amigo.geneontology.org/cgi-bin/amigo/term_details?term=GO:0071345
cation binding	Gene Ontology	GO:0043169	10	4078	4.2e-05	0.000362091	http://amigo.geneontology.org/cgi-bin/amigo/term_details?term=GO:0043169
regulation of embryonic development	Gene Ontology	GO:0045995	3	114	4.21e-05	0.000362091	http://amigo.geneontology.org/cgi-bin/amigo/term_details?term=GO:0045995
receptor agonist activity	Gene Ontology	GO:0048018	2	16	4.86e-05	0.000414612	http://amigo.geneontology.org/cgi-bin/amigo/term_details?term=GO:0048018
cellular metabolic process	Gene Ontology	GO:0044237	15	9846	4.87e-05	0.000414612	http://amigo.geneontology.org/cgi-bin/amigo/term_details?term=GO:0044237
embryonic skeletal system development	Gene Ontology	GO:0048706	3	121	5e-05	0.000423745	http://amigo.geneontology.org/cgi-bin/amigo/term_details?term=GO:0048706
leukocyte migration	Gene Ontology	GO:0050900	4	356	5.1e-05	0.000425053	http://amigo.geneontology.org/cgi-bin/amigo/term_details?term=GO:0050900
secretory granule	Gene Ontology	GO:0030141	4	356	5.1e-05	0.000425053	http://amigo.geneontology.org/cgi-bin/amigo/term_details?term=GO:0030141
cell morphogenesis involved in differentiation	Gene Ontology	GO:0000904	5	721	5.11e-05	0.000425053	http://amigo.geneontology.org/cgi-bin/amigo/term_details?term=GO:0000904
positive regulation of angiogenesis	Gene Ontology	GO:0045766	3	122	5.12e-05	0.000425053	http://amigo.geneontology.org/cgi-bin/amigo/term_details?term=GO:0045766
embryonic appendage morphogenesis	Gene Ontology	GO:0035113	3	125	5.5e-05	0.000451487	http://amigo.geneontology.org/cgi-bin/amigo/term_details?term=GO:0035113
embryonic limb morphogenesis	Gene Ontology	GO:0030326	3	125	5.5e-05	0.000451487	http://amigo.geneontology.org/cgi-bin/amigo/term_details?term=GO:0030326
ion binding	Gene Ontology	GO:0043167	10	4228	5.73e-05	0.000468647	http://amigo.geneontology.org/cgi-bin/amigo/term_details?term=GO:0043167
regulation of protein transport	Gene Ontology	GO:0051223	5	740	5.78e-05	0.000469908	http://amigo.geneontology.org/cgi-bin/amigo/term_details?term=GO:0051223
negative regulation of bone mineralization	Gene Ontology	GO:0030502	2	18	6.04e-05	0.000488362	http://amigo.geneontology.org/cgi-bin/amigo/term_details?term=GO:0030502
regulation of nervous system development	Gene Ontology	GO:0051960	5	749	6.12e-05	0.000492388	http://amigo.geneontology.org/cgi-bin/amigo/term_details?term=GO:0051960
biomineral tissue development	Gene Ontology	GO:0031214	3	132	6.44e-05	0.000515781	http://amigo.geneontology.org/cgi-bin/amigo/term_details?term=GO:0031214
cell surface receptor signaling pathway	Gene Ontology	GO:0007166	8	2583	6.47e-05	0.000515884	http://amigo.geneontology.org/cgi-bin/amigo/term_details?term=GO:0007166
positive regulation of vasculature development	Gene Ontology	GO:1904018	3	135	6.87e-05	0.000542973	http://amigo.geneontology.org/cgi-bin/amigo/term_details?term=GO:1904018
regulation of peptidase activity	Gene Ontology	GO:0052547	4	385	6.88e-05	0.000542973	http://amigo.geneontology.org/cgi-bin/amigo/term_details?term=GO:0052547
positive regulation of response to stimulus	Gene Ontology	GO:0048584	7	1903	7.22e-05	0.000564914	http://amigo.geneontology.org/cgi-bin/amigo/term_details?term=GO:0048584
positive regulation of cell migration	Gene Ontology	GO:0030335	4	390	7.23e-05	0.000564914	http://amigo.geneontology.org/cgi-bin/amigo/term_details?term=GO:0030335
negative regulation of biomineral tissue development	Gene Ontology	GO:0070168	2	20	7.33e-05	0.000570397	http://amigo.geneontology.org/cgi-bin/amigo/term_details?term=GO:0070168
eye morphogenesis	Gene Ontology	GO:0048592	3	140	7.64e-05	0.000591347	http://amigo.geneontology.org/cgi-bin/amigo/term_details?term=GO:0048592
regulation of signal transduction	Gene Ontology	GO:0009966	8	2663	8.03e-05	0.000618485	http://amigo.geneontology.org/cgi-bin/amigo/term_details?term=GO:0009966
positive regulation of cell motility	Gene Ontology	GO:2000147	4	402	8.12e-05	0.000622229	http://amigo.geneontology.org/cgi-bin/amigo/term_details?term=GO:2000147
response to cytokine	Gene Ontology	GO:0034097	5	797	8.18e-05	0.00062444	http://amigo.geneontology.org/cgi-bin/amigo/term_details?term=GO:0034097
limb morphogenesis	Gene Ontology	GO:0035108	3	146	8.63e-05	0.000652328	http://amigo.geneontology.org/cgi-bin/amigo/term_details?term=GO:0035108
appendage morphogenesis	Gene Ontology	GO:0035107	3	146	8.63e-05	0.000652328	http://amigo.geneontology.org/cgi-bin/amigo/term_details?term=GO:0035107
membrane-bounded vesicle	Gene Ontology	GO:0031988	9	3520	8.68e-05	0.000652671	http://amigo.geneontology.org/cgi-bin/amigo/term_details?term=GO:0031988
positive regulation of locomotion	Gene Ontology	GO:0040017	4	413	9e-05	0.000671637	http://amigo.geneontology.org/cgi-bin/amigo/term_details?term=GO:0040017
positive regulation of cell differentiation	Gene Ontology	GO:0045597	5	814	9.03e-05	0.000671637	http://amigo.geneontology.org/cgi-bin/amigo/term_details?term=GO:0045597
positive regulation of cellular component movement	Gene Ontology	GO:0051272	4	414	9.08e-05	0.000671637	http://amigo.geneontology.org/cgi-bin/amigo/term_details?term=GO:0051272
response to BMP	Gene Ontology	GO:0071772	3	149	9.16e-05	0.000671637	http://amigo.geneontology.org/cgi-bin/amigo/term_details?term=GO:0071772
cellular response to BMP stimulus	Gene Ontology	GO:0071773	3	149	9.16e-05	0.000671637	http://amigo.geneontology.org/cgi-bin/amigo/term_details?term=GO:0071773
establishment of protein localization	Gene Ontology	GO:0045184	7	1977	9.18e-05	0.000671637	http://amigo.geneontology.org/cgi-bin/amigo/term_details?term=GO:0045184
endothelial cell migration	Gene Ontology	GO:0043542	3	151	9.52e-05	0.000693306	http://amigo.geneontology.org/cgi-bin/amigo/term_details?term=GO:0043542
negative regulation of response to stimulus	Gene Ontology	GO:0048585	6	1355	9.7e-05	0.000703436	http://amigo.geneontology.org/cgi-bin/amigo/term_details?term=GO:0048585
positive regulation of cell proliferation	Gene Ontology	GO:0008284	5	829	9.84e-05	0.00071015	http://amigo.geneontology.org/cgi-bin/amigo/term_details?term=GO:0008284
cellular response to acid chemical	Gene Ontology	GO:0071229	3	154	0.000100763	0.000724234	http://amigo.geneontology.org/cgi-bin/amigo/term_details?term=GO:0071229
trabecula formation	Gene Ontology	GO:0060343	2	25	0.000111238	0.000792447	http://amigo.geneontology.org/cgi-bin/amigo/term_details?term=GO:0060343
chondrocyte development	Gene Ontology	GO:0002063	2	25	0.000111238	0.000792447	http://amigo.geneontology.org/cgi-bin/amigo/term_details?term=GO:0002063
vesicle	Gene Ontology	GO:0031982	9	3652	0.000115472	0.000818987	http://amigo.geneontology.org/cgi-bin/amigo/term_details?term=GO:0031982
cellular response to stimulus	Gene Ontology	GO:0051716	12	6741	0.000119502	0.000843855	http://amigo.geneontology.org/cgi-bin/amigo/term_details?term=GO:0051716
regulation of macromolecule metabolic process	Gene Ontology	GO:0060255	11	5638	0.000120675	0.000848417	http://amigo.geneontology.org/cgi-bin/amigo/term_details?term=GO:0060255
positive regulation of protein transport	Gene Ontology	GO:0051222	4	454	0.000129058	0.000900168	http://amigo.geneontology.org/cgi-bin/amigo/term_details?term=GO:0051222
appendage development	Gene Ontology	GO:0048736	3	168	0.000129714	0.000900168	http://amigo.geneontology.org/cgi-bin/amigo/term_details?term=GO:0048736
limb development	Gene Ontology	GO:0060173	3	168	0.000129714	0.000900168	http://amigo.geneontology.org/cgi-bin/amigo/term_details?term=GO:0060173
mesenchymal cell development	Gene Ontology	GO:0014031	3	171	0.000136548	0.000943532	http://amigo.geneontology.org/cgi-bin/amigo/term_details?term=GO:0014031
bone development	Gene Ontology	GO:0060348	3	172	0.000138878	0.000955526	http://amigo.geneontology.org/cgi-bin/amigo/term_details?term=GO:0060348
secretory vesicle	Gene Ontology	GO:0099503	4	465	0.000141358	0.000968453	http://amigo.geneontology.org/cgi-bin/amigo/term_details?term=GO:0099503
receptor binding	Gene Ontology	GO:0005102	6	1458	0.000144702	0.000987162	http://amigo.geneontology.org/cgi-bin/amigo/term_details?term=GO:0005102
regulation of ossification	Gene Ontology	GO:0030278	3	177	0.000150913	0.00102145	http://amigo.geneontology.org/cgi-bin/amigo/term_details?term=GO:0030278
cellular response to oxygen-containing compound	Gene Ontology	GO:1901701	5	909	0.000150996	0.00102145	http://amigo.geneontology.org/cgi-bin/amigo/term_details?term=GO:1901701
response to corticosteroid	Gene Ontology	GO:0031960	3	179	0.000155911	0.00104827	http://amigo.geneontology.org/cgi-bin/amigo/term_details?term=GO:0031960
laminin binding	Gene Ontology	GO:0043236	2	30	0.000156915	0.00104827	http://amigo.geneontology.org/cgi-bin/amigo/term_details?term=GO:0043236
proteoglycan binding	Gene Ontology	GO:0043394	2	30	0.000156915	0.00104827	http://amigo.geneontology.org/cgi-bin/amigo/term_details?term=GO:0043394
carbohydrate derivative binding	Gene Ontology	GO:0097367	7	2174	0.000165877	0.00108841	http://amigo.geneontology.org/cgi-bin/amigo/term_details?term=GO:0097367
response to organic cyclic compound	Gene Ontology	GO:0014070	5	928	0.000166188	0.00108841	http://amigo.geneontology.org/cgi-bin/amigo/term_details?term=GO:0014070
mesenchymal cell differentiation	Gene Ontology	GO:0048762	3	183	0.000166227	0.00108841	http://amigo.geneontology.org/cgi-bin/amigo/term_details?term=GO:0048762
regulation of cell communication	Gene Ontology	GO:0010646	8	2955	0.000166266	0.00108841	http://amigo.geneontology.org/cgi-bin/amigo/term_details?term=GO:0010646
substrate-dependent cell migration	Gene Ontology	GO:0006929	2	31	0.00016698	0.00108841	http://amigo.geneontology.org/cgi-bin/amigo/term_details?term=GO:0006929
cellular response to vitamin	Gene Ontology	GO:0071295	2	31	0.00016698	0.00108841	http://amigo.geneontology.org/cgi-bin/amigo/term_details?term=GO:0071295
response to ketone	Gene Ontology	GO:1901654	3	184	0.000168874	0.00109632	http://amigo.geneontology.org/cgi-bin/amigo/term_details?term=GO:1901654
cell growth	Gene Ontology	GO:0016049	4	488	0.000169795	0.00109787	http://amigo.geneontology.org/cgi-bin/amigo/term_details?term=GO:0016049
heart development	Gene Ontology	GO:0007507	4	493	0.000176487	0.00113657	http://amigo.geneontology.org/cgi-bin/amigo/term_details?term=GO:0007507
receptor activator activity	Gene Ontology	GO:0030546	2	32	0.000177353	0.00113761	http://amigo.geneontology.org/cgi-bin/amigo/term_details?term=GO:0030546
enzyme regulator activity	Gene Ontology	GO:0030234	5	949	0.000184316	0.00117757	http://amigo.geneontology.org/cgi-bin/amigo/term_details?term=GO:0030234
regulation of signaling	Gene Ontology	GO:0023051	8	3006	0.000187208	0.00119132	http://amigo.geneontology.org/cgi-bin/amigo/term_details?term=GO:0023051
cellular response to extracellular stimulus	Gene Ontology	GO:0031668	3	192	0.000191038	0.00121091	http://amigo.geneontology.org/cgi-bin/amigo/term_details?term=GO:0031668
negative regulation of cellular protein metabolic process	Gene Ontology	GO:0032269	5	961	0.000195334	0.00123329	http://amigo.geneontology.org/cgi-bin/amigo/term_details?term=GO:0032269
positive regulation of establishment of protein localization	Gene Ontology	GO:1904951	4	511	0.000202165	0.00127143	http://amigo.geneontology.org/cgi-bin/amigo/term_details?term=GO:1904951
regulation of metabolic process	Gene Ontology	GO:0019222	11	5989	0.000209841	0.0013125	http://amigo.geneontology.org/cgi-bin/amigo/term_details?term=GO:0019222
sulfur compound catabolic process	Gene Ontology	GO:0044273	2	35	0.000210326	0.0013125	http://amigo.geneontology.org/cgi-bin/amigo/term_details?term=GO:0044273
response to nutrient	Gene Ontology	GO:0007584	3	199	0.000211913	0.0013173	http://amigo.geneontology.org/cgi-bin/amigo/term_details?term=GO:0007584
negative regulation of cell migration	Gene Ontology	GO:0030336	3	203	0.00022448	0.00139005	http://amigo.geneontology.org/cgi-bin/amigo/term_details?term=GO:0030336
peptidase regulator activity	Gene Ontology	GO:0061134	3	207	0.000237521	0.00146517	http://amigo.geneontology.org/cgi-bin/amigo/term_details?term=GO:0061134
cellular response to transforming growth factor beta stimulus	Gene Ontology	GO:0071560	3	208	0.000240856	0.00147444	http://amigo.geneontology.org/cgi-bin/amigo/term_details?term=GO:0071560
visual perception	Gene Ontology	GO:0007601	3	208	0.000240856	0.00147444	http://amigo.geneontology.org/cgi-bin/amigo/term_details?term=GO:0007601
developmental growth involved in morphogenesis	Gene Ontology	GO:0060560	3	209	0.000244221	0.00148936	http://amigo.geneontology.org/cgi-bin/amigo/term_details?term=GO:0060560
collagen biosynthetic process	Gene Ontology	GO:0032964	2	38	0.000246068	0.00148936	http://amigo.geneontology.org/cgi-bin/amigo/term_details?term=GO:0032964
peptidase activator activity	Gene Ontology	GO:0016504	2	38	0.000246068	0.00148936	http://amigo.geneontology.org/cgi-bin/amigo/term_details?term=GO:0016504
primary metabolic process	Gene Ontology	GO:0044238	14	9824	0.000249149	0.00150236	http://amigo.geneontology.org/cgi-bin/amigo/term_details?term=GO:0044238
response to mechanical stimulus	Gene Ontology	GO:0009612	3	211	0.000251042	0.00150252	http://amigo.geneontology.org/cgi-bin/amigo/term_details?term=GO:0009612
response to transforming growth factor beta	Gene Ontology	GO:0071559	3	211	0.000251042	0.00150252	http://amigo.geneontology.org/cgi-bin/amigo/term_details?term=GO:0071559
sensory perception of light stimulus	Gene Ontology	GO:0050953	3	212	0.000254499	0.00151338	http://amigo.geneontology.org/cgi-bin/amigo/term_details?term=GO:0050953
negative regulation of protein metabolic process	Gene Ontology	GO:0051248	5	1018	0.000254737	0.00151338	http://amigo.geneontology.org/cgi-bin/amigo/term_details?term=GO:0051248
regulation of cellular protein localization	Gene Ontology	GO:1903827	4	544	0.000256103	0.0015159	http://amigo.geneontology.org/cgi-bin/amigo/term_details?term=GO:1903827
positive regulation of gene expression	Gene Ontology	GO:0010628	6	1623	0.000258456	0.00152423	http://amigo.geneontology.org/cgi-bin/amigo/term_details?term=GO:0010628
negative regulation of cell motility	Gene Ontology	GO:2000146	3	215	0.000265053	0.00155743	http://amigo.geneontology.org/cgi-bin/amigo/term_details?term=GO:2000146
regulation of neuron differentiation	Gene Ontology	GO:0045664	4	551	0.000268757	0.00157345	http://amigo.geneontology.org/cgi-bin/amigo/term_details?term=GO:0045664
chordate embryonic development	Gene Ontology	GO:0043009	4	554	0.000274316	0.00159776	http://amigo.geneontology.org/cgi-bin/amigo/term_details?term=GO:0043009
epithelial cell migration	Gene Ontology	GO:0010631	3	218	0.000275887	0.00159776	http://amigo.geneontology.org/cgi-bin/amigo/term_details?term=GO:0010631
heart morphogenesis	Gene Ontology	GO:0003007	3	218	0.000275887	0.00159776	http://amigo.geneontology.org/cgi-bin/amigo/term_details?term=GO:0003007
trabecula morphogenesis	Gene Ontology	GO:0061383	2	41	0.00028457	0.00164202	http://amigo.geneontology.org/cgi-bin/amigo/term_details?term=GO:0061383
muscle structure development	Gene Ontology	GO:0061061	4	560	0.000285681	0.00164202	http://amigo.geneontology.org/cgi-bin/amigo/term_details?term=GO:0061061
epithelium migration	Gene Ontology	GO:0090132	3	221	0.000287004	0.00164202	http://amigo.geneontology.org/cgi-bin/amigo/term_details?term=GO:0090132
embryo development ending in birth or egg hatching	Gene Ontology	GO:0009792	4	561	0.000287608	0.00164202	http://amigo.geneontology.org/cgi-bin/amigo/term_details?term=GO:0009792
protein localization	Gene Ontology	GO:0008104	7	2383	0.000291865	0.00166043	http://amigo.geneontology.org/cgi-bin/amigo/term_details?term=GO:0008104
tissue migration	Gene Ontology	GO:0090130	3	227	0.000310098	0.00175506	http://amigo.geneontology.org/cgi-bin/amigo/term_details?term=GO:0090130
glial cell migration	Gene Ontology	GO:0008347	2	43	0.000311768	0.00175506	http://amigo.geneontology.org/cgi-bin/amigo/term_details?term=GO:0008347
negative regulation of BMP signaling pathway	Gene Ontology	GO:0030514	2	43	0.000311768	0.00175506	http://amigo.geneontology.org/cgi-bin/amigo/term_details?term=GO:0030514
protein metabolic process	Gene Ontology	GO:0019538	10	5191	0.00032462	0.00182104	http://amigo.geneontology.org/cgi-bin/amigo/term_details?term=GO:0019538
cellular response to nutrient	Gene Ontology	GO:0031670	2	44	0.000325825	0.00182145	http://amigo.geneontology.org/cgi-bin/amigo/term_details?term=GO:0031670
receptor regulator activity	Gene Ontology	GO:0030545	2	45	0.000340186	0.00189516	http://amigo.geneontology.org/cgi-bin/amigo/term_details?term=GO:0030545
regulation of gene expression	Gene Ontology	GO:0010468	9	4211	0.000343022	0.00190437	http://amigo.geneontology.org/cgi-bin/amigo/term_details?term=GO:0010468
negative regulation of cellular component organization	Gene Ontology	GO:0051129	4	589	0.00034545	0.00190638	http://amigo.geneontology.org/cgi-bin/amigo/term_details?term=GO:0051129
regulation of canonical Wnt signaling pathway	Gene Ontology	GO:0060828	3	236	0.000346938	0.00190638	http://amigo.geneontology.org/cgi-bin/amigo/term_details?term=GO:0060828
mesenchyme development	Gene Ontology	GO:0060485	3	236	0.000346938	0.00190638	http://amigo.geneontology.org/cgi-bin/amigo/term_details?term=GO:0060485
negative regulation of peptidase activity	Gene Ontology	GO:0010466	3	239	0.000359816	0.00197042	http://amigo.geneontology.org/cgi-bin/amigo/term_details?term=GO:0010466
skin development	Gene Ontology	GO:0043588	3	241	0.000368571	0.00201153	http://amigo.geneontology.org/cgi-bin/amigo/term_details?term=GO:0043588
tissue morphogenesis	Gene Ontology	GO:0048729	4	604	0.000379659	0.00206361	http://amigo.geneontology.org/cgi-bin/amigo/term_details?term=GO:0048729
negative regulation of locomotion	Gene Ontology	GO:0040013	3	244	0.00038196	0.00206361	http://amigo.geneontology.org/cgi-bin/amigo/term_details?term=GO:0040013
negative regulation of cellular component movement	Gene Ontology	GO:0051271	3	244	0.00038196	0.00206361	http://amigo.geneontology.org/cgi-bin/amigo/term_details?term=GO:0051271
response to abiotic stimulus	Gene Ontology	GO:0009628	5	1122	0.000397655	0.00214122	http://amigo.geneontology.org/cgi-bin/amigo/term_details?term=GO:0009628
cell adhesion mediated by integrin	Gene Ontology	GO:0033627	2	50	0.000416554	0.00223551	http://amigo.geneontology.org/cgi-bin/amigo/term_details?term=GO:0033627
regulation of transcription from RNA polymerase II promoter	Gene Ontology	GO:0006357	6	1782	0.000426111	0.0022792	http://amigo.geneontology.org/cgi-bin/amigo/term_details?term=GO:0006357
positive regulation of intracellular protein transport	Gene Ontology	GO:0090316	3	254	0.000428842	0.00228621	http://amigo.geneontology.org/cgi-bin/amigo/term_details?term=GO:0090316
negative regulation of response to external stimulus	Gene Ontology	GO:0032102	3	258	0.000448583	0.00238356	http://amigo.geneontology.org/cgi-bin/amigo/term_details?term=GO:0032102
endoplasmic reticulum part	Gene Ontology	GO:0044432	5	1158	0.000459135	0.0024316	http://amigo.geneontology.org/cgi-bin/amigo/term_details?term=GO:0044432
cytoplasmic, membrane-bounded vesicle	Gene Ontology	GO:0016023	5	1159	0.00046094	0.00243316	http://amigo.geneontology.org/cgi-bin/amigo/term_details?term=GO:0016023
negative regulation of cell-substrate adhesion	Gene Ontology	GO:0010812	2	53	0.000466011	0.00244911	http://amigo.geneontology.org/cgi-bin/amigo/term_details?term=GO:0010812
protein transport	Gene Ontology	GO:0015031	6	1813	0.000467003	0.00244911	http://amigo.geneontology.org/cgi-bin/amigo/term_details?term=GO:0015031
negative regulation of cell proliferation	Gene Ontology	GO:0008285	4	640	0.000471598	0.00246517	http://amigo.geneontology.org/cgi-bin/amigo/term_details?term=GO:0008285
cell morphogenesis	Gene Ontology	GO:0000902	5	1170	0.00048115	0.00250696	http://amigo.geneontology.org/cgi-bin/amigo/term_details?term=GO:0000902
cellular response to external stimulus	Gene Ontology	GO:0071496	3	268	0.000500471	0.00259097	http://amigo.geneontology.org/cgi-bin/amigo/term_details?term=GO:0071496
cellular response to amino acid stimulus	Gene Ontology	GO:0071230	2	55	0.000500492	0.00259097	http://amigo.geneontology.org/cgi-bin/amigo/term_details?term=GO:0071230
neuron differentiation	Gene Ontology	GO:0030182	5	1195	0.000529579	0.00273276	http://amigo.geneontology.org/cgi-bin/amigo/term_details?term=GO:0030182
regulation of neurogenesis	Gene Ontology	GO:0050767	4	663	0.000538076	0.00276774	http://amigo.geneontology.org/cgi-bin/amigo/term_details?term=GO:0050767
signal transduction	Gene Ontology	GO:0007165	10	5542	0.000555287	0.00284717	http://amigo.geneontology.org/cgi-bin/amigo/term_details?term=GO:0007165
regulation of proteolysis	Gene Ontology	GO:0030162	4	675	0.000575295	0.0029404	http://amigo.geneontology.org/cgi-bin/amigo/term_details?term=GO:0030162
regulation of epithelial cell proliferation	Gene Ontology	GO:0050678	3	283	0.000585289	0.00298201	http://amigo.geneontology.org/cgi-bin/amigo/term_details?term=GO:0050678
positive regulation of intracellular transport	Gene Ontology	GO:0032388	3	284	0.000591249	0.00299703	http://amigo.geneontology.org/cgi-bin/amigo/term_details?term=GO:0032388
glycosaminoglycan catabolic process	Gene Ontology	GO:0006027	2	60	0.000591961	0.00299703	http://amigo.geneontology.org/cgi-bin/amigo/term_details?term=GO:0006027
regulation of primary metabolic process	Gene Ontology	GO:0080090	10	5629	0.000630184	0.00317294	http://amigo.geneontology.org/cgi-bin/amigo/term_details?term=GO:0080090
cardiac ventricle morphogenesis	Gene Ontology	GO:0003208	2	62	0.000630647	0.00317294	http://amigo.geneontology.org/cgi-bin/amigo/term_details?term=GO:0003208
canonical Wnt signaling pathway	Gene Ontology	GO:0060070	3	291	0.00063406	0.00318018	http://amigo.geneontology.org/cgi-bin/amigo/term_details?term=GO:0060070
cellular component morphogenesis	Gene Ontology	GO:0032989	5	1250	0.000649057	0.00324529	http://amigo.geneontology.org/cgi-bin/amigo/term_details?term=GO:0032989
cytoplasmic vesicle	Gene Ontology	GO:0031410	5	1258	0.000667999	0.00332966	http://amigo.geneontology.org/cgi-bin/amigo/term_details?term=GO:0031410
macromolecule localization	Gene Ontology	GO:0033036	7	2734	0.000670354	0.00333108	http://amigo.geneontology.org/cgi-bin/amigo/term_details?term=GO:0033036
intracellular vesicle	Gene Ontology	GO:0097708	5	1260	0.0006728	0.00333294	http://amigo.geneontology.org/cgi-bin/amigo/term_details?term=GO:0097708
extracellular exosome	Gene Ontology	GO:0070062	7	2738	0.000676244	0.00333973	http://amigo.geneontology.org/cgi-bin/amigo/term_details?term=GO:0070062
regulation of cellular metabolic process	Gene Ontology	GO:0031323	10	5685	0.000682771	0.00336165	http://amigo.geneontology.org/cgi-bin/amigo/term_details?term=GO:0031323
cellular response to retinoic acid	Gene Ontology	GO:0071300	2	65	0.000690918	0.00338109	http://amigo.geneontology.org/cgi-bin/amigo/term_details?term=GO:0071300
aminoglycan catabolic process	Gene Ontology	GO:0006026	2	65	0.000690918	0.00338109	http://amigo.geneontology.org/cgi-bin/amigo/term_details?term=GO:0006026
extracellular vesicle	Gene Ontology	GO:1903561	7	2751	0.000695671	0.00339114	http://amigo.geneontology.org/cgi-bin/amigo/term_details?term=GO:1903561
extracellular organelle	Gene Ontology	GO:0043230	7	2752	0.000697184	0.00339114	http://amigo.geneontology.org/cgi-bin/amigo/term_details?term=GO:0043230
negative regulation of proteolysis	Gene Ontology	GO:0045861	3	304	0.000718731	0.00348541	http://amigo.geneontology.org/cgi-bin/amigo/term_details?term=GO:0045861
regulation of protein targeting	Gene Ontology	GO:1903533	3	306	0.000732365	0.00354086	http://amigo.geneontology.org/cgi-bin/amigo/term_details?term=GO:1903533
regulation of Wnt signaling pathway	Gene Ontology	GO:0030111	3	307	0.000739243	0.00356342	http://amigo.geneontology.org/cgi-bin/amigo/term_details?term=GO:0030111
transcription from RNA polymerase II promoter	Gene Ontology	GO:0006366	6	1985	0.000753309	0.00362038	http://amigo.geneontology.org/cgi-bin/amigo/term_details?term=GO:0006366
positive regulation of transcription, DNA-templated	Gene Ontology	GO:0045893	5	1299	0.00077171	0.00368282	http://amigo.geneontology.org/cgi-bin/amigo/term_details?term=GO:0045893
positive regulation of nucleic acid-templated transcription	Gene Ontology	GO:1903508	5	1299	0.00077171	0.00368282	http://amigo.geneontology.org/cgi-bin/amigo/term_details?term=GO:1903508
regulation of bone mineralization	Gene Ontology	GO:0030500	2	69	0.00077545	0.00368282	http://amigo.geneontology.org/cgi-bin/amigo/term_details?term=GO:0030500
negative regulation of ossification	Gene Ontology	GO:0030279	2	69	0.00077545	0.00368282	http://amigo.geneontology.org/cgi-bin/amigo/term_details?term=GO:0030279
ameboidal-type cell migration	Gene Ontology	GO:0001667	3	316	0.000803012	0.00379714	http://amigo.geneontology.org/cgi-bin/amigo/term_details?term=GO:0001667
generation of neurons	Gene Ontology	GO:0048699	5	1311	0.000804238	0.00379714	http://amigo.geneontology.org/cgi-bin/amigo/term_details?term=GO:0048699
cellular protein metabolic process	Gene Ontology	GO:0044267	9	4725	0.000808559	0.00380637	http://amigo.geneontology.org/cgi-bin/amigo/term_details?term=GO:0044267
positive regulation of RNA biosynthetic process	Gene Ontology	GO:1902680	5	1317	0.000820884	0.00385313	http://amigo.geneontology.org/cgi-bin/amigo/term_details?term=GO:1902680
negative regulation of angiogenesis	Gene Ontology	GO:0016525	2	72	0.000841966	0.0039406	http://amigo.geneontology.org/cgi-bin/amigo/term_details?term=GO:0016525
regulation of response to stress	Gene Ontology	GO:0080134	5	1337	0.000878248	0.00409849	http://amigo.geneontology.org/cgi-bin/amigo/term_details?term=GO:0080134
molecular function regulator	Gene Ontology	GO:0098772	5	1341	0.000890073	0.00414167	http://amigo.geneontology.org/cgi-bin/amigo/term_details?term=GO:0098772
negative regulation of blood vessel morphogenesis	Gene Ontology	GO:2000181	2	75	0.000911143	0.00419126	http://amigo.geneontology.org/cgi-bin/amigo/term_details?term=GO:2000181
bone remodeling	Gene Ontology	GO:0046849	2	75	0.000911143	0.00419126	http://amigo.geneontology.org/cgi-bin/amigo/term_details?term=GO:0046849
platelet alpha granule	Gene Ontology	GO:0031091	2	75	0.000911143	0.00419126	http://amigo.geneontology.org/cgi-bin/amigo/term_details?term=GO:0031091
regulation of biomineral tissue development	Gene Ontology	GO:0070167	2	75	0.000911143	0.00419126	http://amigo.geneontology.org/cgi-bin/amigo/term_details?term=GO:0070167
positive regulation of RNA metabolic process	Gene Ontology	GO:0051254	5	1359	0.000944771	0.00433357	http://amigo.geneontology.org/cgi-bin/amigo/term_details?term=GO:0051254
regulation of BMP signaling pathway	Gene Ontology	GO:0030510	2	78	0.000982973	0.00449598	http://amigo.geneontology.org/cgi-bin/amigo/term_details?term=GO:0030510
bone morphogenesis	Gene Ontology	GO:0060349	2	79	0.0010075	0.00458215	http://amigo.geneontology.org/cgi-bin/amigo/term_details?term=GO:0060349
substrate adhesion-dependent cell spreading	Gene Ontology	GO:0034446	2	79	0.0010075	0.00458215	http://amigo.geneontology.org/cgi-bin/amigo/term_details?term=GO:0034446
single organism signaling	Gene Ontology	GO:0044700	10	5972	0.0010141	0.00459916	http://amigo.geneontology.org/cgi-bin/amigo/term_details?term=GO:0044700
signaling	Gene Ontology	GO:0023052	10	5978	0.00102226	0.00461583	http://amigo.geneontology.org/cgi-bin/amigo/term_details?term=GO:0023052
muscle organ development	Gene Ontology	GO:0007517	3	344	0.00102351	0.00461583	http://amigo.geneontology.org/cgi-bin/amigo/term_details?term=GO:0007517
positive regulation of signal transduction	Gene Ontology	GO:0009967	5	1385	0.00102819	0.00462396	http://amigo.geneontology.org/cgi-bin/amigo/term_details?term=GO:0009967
negative regulation of vasculature development	Gene Ontology	GO:1901343	2	80	0.00103233	0.00462966	http://amigo.geneontology.org/cgi-bin/amigo/term_details?term=GO:1901343
regulation of response to external stimulus	Gene Ontology	GO:0032101	4	794	0.00104999	0.00469457	http://amigo.geneontology.org/cgi-bin/amigo/term_details?term=GO:0032101
cell communication	Gene Ontology	GO:0007154	10	6000	0.00105263	0.00469457	http://amigo.geneontology.org/cgi-bin/amigo/term_details?term=GO:0007154
protein localization to nucleus	Gene Ontology	GO:0034504	3	351	0.00108404	0.00480993	http://amigo.geneontology.org/cgi-bin/amigo/term_details?term=GO:0034504
neuron projection development	Gene Ontology	GO:0031175	4	801	0.00108447	0.00480993	http://amigo.geneontology.org/cgi-bin/amigo/term_details?term=GO:0031175
protein complex	Gene Ontology	GO:0043234	8	3913	0.00111335	0.00492446	http://amigo.geneontology.org/cgi-bin/amigo/term_details?term=GO:0043234
positive regulation of cellular protein localization	Gene Ontology	GO:1903829	3	355	0.00111962	0.00493859	http://amigo.geneontology.org/cgi-bin/amigo/term_details?term=GO:1903829
regulation of cellular localization	Gene Ontology	GO:0060341	4	810	0.00112998	0.00497068	http://amigo.geneontology.org/cgi-bin/amigo/term_details?term=GO:0060341
secretory granule lumen	Gene Ontology	GO:0034774	2	85	0.00116084	0.00506493	http://amigo.geneontology.org/cgi-bin/amigo/term_details?term=GO:0034774
cell-substrate junction assembly	Gene Ontology	GO:0007044	2	85	0.00116084	0.00506493	http://amigo.geneontology.org/cgi-bin/amigo/term_details?term=GO:0007044
proteoglycan metabolic process	Gene Ontology	GO:0006029	2	85	0.00116084	0.00506493	http://amigo.geneontology.org/cgi-bin/amigo/term_details?term=GO:0006029
negative regulation of catalytic activity	Gene Ontology	GO:0043086	4	820	0.0011821	0.00514375	http://amigo.geneontology.org/cgi-bin/amigo/term_details?term=GO:0043086
macromolecule biosynthetic process	Gene Ontology	GO:0009059	9	4981	0.0011884	0.00515721	http://amigo.geneontology.org/cgi-bin/amigo/term_details?term=GO:0009059
regulation of intracellular protein transport	Gene Ontology	GO:0033157	3	373	0.00128889	0.00557828	http://amigo.geneontology.org/cgi-bin/amigo/term_details?term=GO:0033157
regulation of cell-matrix adhesion	Gene Ontology	GO:0001952	2	90	0.00129665	0.0055968	http://amigo.geneontology.org/cgi-bin/amigo/term_details?term=GO:0001952
positive regulation of cell adhesion	Gene Ontology	GO:0045785	3	377	0.00132858	0.00571929	http://amigo.geneontology.org/cgi-bin/amigo/term_details?term=GO:0045785
embryonic skeletal system morphogenesis	Gene Ontology	GO:0048704	2	92	0.00135301	0.00580605	http://amigo.geneontology.org/cgi-bin/amigo/term_details?term=GO:0048704
response to oxygen-containing compound	Gene Ontology	GO:1901700	5	1474	0.00135595	0.00580605	http://amigo.geneontology.org/cgi-bin/amigo/term_details?term=GO:1901700
regulation of cell death	Gene Ontology	GO:0010941	5	1480	0.00138054	0.00588467	http://amigo.geneontology.org/cgi-bin/amigo/term_details?term=GO:0010941
Golgi lumen	Gene Ontology	GO:0005796	2	93	0.00138162	0.00588467	http://amigo.geneontology.org/cgi-bin/amigo/term_details?term=GO:0005796
negative regulation of protein phosphorylation	Gene Ontology	GO:0001933	3	384	0.00139987	0.00594668	http://amigo.geneontology.org/cgi-bin/amigo/term_details?term=GO:0001933
inner ear morphogenesis	Gene Ontology	GO:0042472	2	94	0.00141052	0.00597614	http://amigo.geneontology.org/cgi-bin/amigo/term_details?term=GO:0042472
regulation of cell growth	Gene Ontology	GO:0001558	3	387	0.00143115	0.00604764	http://amigo.geneontology.org/cgi-bin/amigo/term_details?term=GO:0001558
response to steroid hormone	Gene Ontology	GO:0048545	3	390	0.00146286	0.00615987	http://amigo.geneontology.org/cgi-bin/amigo/term_details?term=GO:0048545
protein localization to organelle	Gene Ontology	GO:0033365	4	870	0.00146841	0.00615987	http://amigo.geneontology.org/cgi-bin/amigo/term_details?term=GO:0033365
response to amino acid	Gene Ontology	GO:0043200	2	96	0.00146919	0.00615987	http://amigo.geneontology.org/cgi-bin/amigo/term_details?term=GO:0043200
negative regulation of hydrolase activity	Gene Ontology	GO:0051346	3	391	0.00147353	0.00616205	http://amigo.geneontology.org/cgi-bin/amigo/term_details?term=GO:0051346
negative regulation of macromolecule metabolic process	Gene Ontology	GO:0010605	6	2269	0.00150775	0.00628882	http://amigo.geneontology.org/cgi-bin/amigo/term_details?term=GO:0010605
positive regulation of cell communication	Gene Ontology	GO:0010647	5	1513	0.00152179	0.00633095	http://amigo.geneontology.org/cgi-bin/amigo/term_details?term=GO:0010647
negative regulation of cell death	Gene Ontology	GO:0060548	4	881	0.00153737	0.0063793	http://amigo.geneontology.org/cgi-bin/amigo/term_details?term=GO:0060548
positive regulation of signaling	Gene Ontology	GO:0023056	5	1518	0.00154409	0.00639071	http://amigo.geneontology.org/cgi-bin/amigo/term_details?term=GO:0023056
regulation of catalytic activity	Gene Ontology	GO:0050790	6	2289	0.00157718	0.00646429	http://amigo.geneontology.org/cgi-bin/amigo/term_details?term=GO:0050790
negative regulation of cellular metabolic process	Gene Ontology	GO:0031324	6	2290	0.00158072	0.00646429	http://amigo.geneontology.org/cgi-bin/amigo/term_details?term=GO:0031324
gene expression	Gene Ontology	GO:0010467	9	5182	0.00158074	0.00646429	http://amigo.geneontology.org/cgi-bin/amigo/term_details?term=GO:0010467
bone mineralization	Gene Ontology	GO:0030282	2	100	0.00158998	0.00646429	http://amigo.geneontology.org/cgi-bin/amigo/term_details?term=GO:0030282
positive regulation of protein import into nucleus	Gene Ontology	GO:0042307	2	100	0.00158998	0.00646429	http://amigo.geneontology.org/cgi-bin/amigo/term_details?term=GO:0042307
positive regulation of cell-substrate adhesion	Gene Ontology	GO:0010811	2	100	0.00158998	0.00646429	http://amigo.geneontology.org/cgi-bin/amigo/term_details?term=GO:0010811
glycoprotein binding	Gene Ontology	GO:0001948	2	100	0.00158998	0.00646429	http://amigo.geneontology.org/cgi-bin/amigo/term_details?term=GO:0001948
endopeptidase activity	Gene Ontology	GO:0004175	3	402	0.00159415	0.00646494	http://amigo.geneontology.org/cgi-bin/amigo/term_details?term=GO:0004175
regulation of cellular protein metabolic process	Gene Ontology	GO:0032268	6	2295	0.00159848	0.00646622	http://amigo.geneontology.org/cgi-bin/amigo/term_details?term=GO:0032268
response to lipid	Gene Ontology	GO:0033993	4	893	0.00161516	0.00650732	http://amigo.geneontology.org/cgi-bin/amigo/term_details?term=GO:0033993
regulation of neuron projection development	Gene Ontology	GO:0010975	3	404	0.00161673	0.00650732	http://amigo.geneontology.org/cgi-bin/amigo/term_details?term=GO:0010975
positive regulation of macromolecule biosynthetic process	Gene Ontology	GO:0010557	5	1538	0.00163574	0.00656745	http://amigo.geneontology.org/cgi-bin/amigo/term_details?term=GO:0010557
negative regulation of transmembrane receptor protein serine/threonine kinase signaling pathway	Gene Ontology	GO:0090101	2	102	0.00165209	0.00660998	http://amigo.geneontology.org/cgi-bin/amigo/term_details?term=GO:0090101
cellular protein localization	Gene Ontology	GO:0034613	5	1542	0.00165455	0.00660998	http://amigo.geneontology.org/cgi-bin/amigo/term_details?term=GO:0034613
positive regulation of protein import	Gene Ontology	GO:1904591	2	103	0.00168358	0.00670932	http://amigo.geneontology.org/cgi-bin/amigo/term_details?term=GO:1904591
cellular macromolecule localization	Gene Ontology	GO:0070727	5	1550	0.00169264	0.00672875	http://amigo.geneontology.org/cgi-bin/amigo/term_details?term=GO:0070727
cardiac chamber morphogenesis	Gene Ontology	GO:0003206	2	104	0.00171536	0.00678556	http://amigo.geneontology.org/cgi-bin/amigo/term_details?term=GO:0003206
cytoplasmic membrane-bounded vesicle lumen	Gene Ontology	GO:0060205	2	104	0.00171536	0.00678556	http://amigo.geneontology.org/cgi-bin/amigo/term_details?term=GO:0060205
response to vitamin	Gene Ontology	GO:0033273	2	105	0.00174742	0.00689544	http://amigo.geneontology.org/cgi-bin/amigo/term_details?term=GO:0033273
cardiac ventricle development	Gene Ontology	GO:0003231	2	106	0.00177976	0.00697181	http://amigo.geneontology.org/cgi-bin/amigo/term_details?term=GO:0003231
platelet degranulation	Gene Ontology	GO:0002576	2	106	0.00177976	0.00697181	http://amigo.geneontology.org/cgi-bin/amigo/term_details?term=GO:0002576
vesicle lumen	Gene Ontology	GO:0031983	2	106	0.00177976	0.00697181	http://amigo.geneontology.org/cgi-bin/amigo/term_details?term=GO:0031983
negative regulation of phosphorylation	Gene Ontology	GO:0042326	3	419	0.00179248	0.00700458	http://amigo.geneontology.org/cgi-bin/amigo/term_details?term=GO:0042326
response to nutrient levels	Gene Ontology	GO:0031667	3	422	0.00182901	0.00713002	http://amigo.geneontology.org/cgi-bin/amigo/term_details?term=GO:0031667
response to retinoic acid	Gene Ontology	GO:0032526	2	108	0.00184531	0.00717619	http://amigo.geneontology.org/cgi-bin/amigo/term_details?term=GO:0032526
positive regulation of transport	Gene Ontology	GO:0051050	4	928	0.00185776	0.0072072	http://amigo.geneontology.org/cgi-bin/amigo/term_details?term=GO:0051050
neuron development	Gene Ontology	GO:0048666	4	936	0.00191658	0.00740962	http://amigo.geneontology.org/cgi-bin/amigo/term_details?term=GO:0048666
positive regulation of nucleobase-containing compound metabolic process	Gene Ontology	GO:0045935	5	1595	0.00191914	0.00740962	http://amigo.geneontology.org/cgi-bin/amigo/term_details?term=GO:0045935
glycosaminoglycan biosynthetic process	Gene Ontology	GO:0006024	2	111	0.00194576	0.00747653	http://amigo.geneontology.org/cgi-bin/amigo/term_details?term=GO:0006024
metalloendopeptidase activity	Gene Ontology	GO:0004222	2	111	0.00194576	0.00747653	http://amigo.geneontology.org/cgi-bin/amigo/term_details?term=GO:0004222
aminoglycan biosynthetic process	Gene Ontology	GO:0006023	2	112	0.00197981	0.00758926	http://amigo.geneontology.org/cgi-bin/amigo/term_details?term=GO:0006023
mucopolysaccharide metabolic process	Gene Ontology	GO:1903510	2	113	0.00201414	0.00768428	http://amigo.geneontology.org/cgi-bin/amigo/term_details?term=GO:1903510
cellular response to glucose stimulus	Gene Ontology	GO:0071333	2	113	0.00201414	0.00768428	http://amigo.geneontology.org/cgi-bin/amigo/term_details?term=GO:0071333
growth	Gene Ontology	GO:0040007	4	951	0.00203037	0.00771474	http://amigo.geneontology.org/cgi-bin/amigo/term_details?term=GO:0040007
positive regulation of nervous system development	Gene Ontology	GO:0051962	3	438	0.00203171	0.00771474	http://amigo.geneontology.org/cgi-bin/amigo/term_details?term=GO:0051962
ear morphogenesis	Gene Ontology	GO:0042471	2	114	0.00204876	0.00776117	http://amigo.geneontology.org/cgi-bin/amigo/term_details?term=GO:0042471
immune system process	Gene Ontology	GO:0002376	6	2414	0.00206869	0.00778349	http://amigo.geneontology.org/cgi-bin/amigo/term_details?term=GO:0002376
endoplasmic reticulum	Gene Ontology	GO:0005783	5	1623	0.00207093	0.00778349	http://amigo.geneontology.org/cgi-bin/amigo/term_details?term=GO:0005783
cellular response to monosaccharide stimulus	Gene Ontology	GO:0071326	2	115	0.00208366	0.00778349	http://amigo.geneontology.org/cgi-bin/amigo/term_details?term=GO:0071326
negative regulation of epithelial cell proliferation	Gene Ontology	GO:0050680	2	115	0.00208366	0.00778349	http://amigo.geneontology.org/cgi-bin/amigo/term_details?term=GO:0050680
cellular response to hexose stimulus	Gene Ontology	GO:0071331	2	115	0.00208366	0.00778349	http://amigo.geneontology.org/cgi-bin/amigo/term_details?term=GO:0071331
embryonic epithelial tube formation	Gene Ontology	GO:0001838	2	115	0.00208366	0.00778349	http://amigo.geneontology.org/cgi-bin/amigo/term_details?term=GO:0001838
epithelial tube formation	Gene Ontology	GO:0072175	2	116	0.00211884	0.00787836	http://amigo.geneontology.org/cgi-bin/amigo/term_details?term=GO:0072175
negative regulation of cell morphogenesis involved in differentiation	Gene Ontology	GO:0010771	2	116	0.00211884	0.00787836	http://amigo.geneontology.org/cgi-bin/amigo/term_details?term=GO:0010771
response to extracellular stimulus	Gene Ontology	GO:0009991	3	449	0.00217889	0.00808299	http://amigo.geneontology.org/cgi-bin/amigo/term_details?term=GO:0009991
regulation of protein metabolic process	Gene Ontology	GO:0051246	6	2443	0.00219786	0.00813461	http://amigo.geneontology.org/cgi-bin/amigo/term_details?term=GO:0051246
positive regulation of canonical Wnt signaling pathway	Gene Ontology	GO:0090263	2	119	0.00222607	0.00822013	http://amigo.geneontology.org/cgi-bin/amigo/term_details?term=GO:0090263
positive regulation of nucleocytoplasmic transport	Gene Ontology	GO:0046824	2	120	0.00226238	0.00833508	http://amigo.geneontology.org/cgi-bin/amigo/term_details?term=GO:0046824
regulation of intracellular signal transduction	Gene Ontology	GO:1902531	5	1662	0.00229691	0.00841556	http://amigo.geneontology.org/cgi-bin/amigo/term_details?term=GO:1902531
negative regulation of cellular response to growth factor stimulus	Gene Ontology	GO:0090288	2	121	0.00229897	0.00841556	http://amigo.geneontology.org/cgi-bin/amigo/term_details?term=GO:0090288
negative regulation of metabolic process	Gene Ontology	GO:0009892	6	2465	0.0022999	0.00841556	http://amigo.geneontology.org/cgi-bin/amigo/term_details?term=GO:0009892
regulation of biological quality	Gene Ontology	GO:0065008	7	3386	0.0023493	0.0085768	http://amigo.geneontology.org/cgi-bin/amigo/term_details?term=GO:0065008
positive regulation of cellular biosynthetic process	Gene Ontology	GO:0031328	5	1673	0.00236381	0.00861025	http://amigo.geneontology.org/cgi-bin/amigo/term_details?term=GO:0031328
regulation of intracellular transport	Gene Ontology	GO:0032386	3	465	0.00240461	0.00873908	http://amigo.geneontology.org/cgi-bin/amigo/term_details?term=GO:0032386
cellular response to carbohydrate stimulus	Gene Ontology	GO:0071322	2	124	0.00241041	0.00874045	http://amigo.geneontology.org/cgi-bin/amigo/term_details?term=GO:0071322
positive regulation of cell development	Gene Ontology	GO:0010720	3	467	0.0024338	0.00880543	http://amigo.geneontology.org/cgi-bin/amigo/term_details?term=GO:0010720
growth factor binding	Gene Ontology	GO:0019838	2	125	0.00244812	0.00881891	http://amigo.geneontology.org/cgi-bin/amigo/term_details?term=GO:0019838
Wnt signaling pathway	Gene Ontology	GO:0016055	3	468	0.00244848	0.00881891	http://amigo.geneontology.org/cgi-bin/amigo/term_details?term=GO:0016055
cell-cell signaling by wnt	Gene Ontology	GO:0198738	3	469	0.00246322	0.00885218	http://amigo.geneontology.org/cgi-bin/amigo/term_details?term=GO:0198738
positive regulation of transcription from RNA polymerase II promoter	Gene Ontology	GO:0045944	4	1005	0.00247899	0.00888903	http://amigo.geneontology.org/cgi-bin/amigo/term_details?term=GO:0045944
enzyme activator activity	Gene Ontology	GO:0008047	3	471	0.00249285	0.00891887	http://amigo.geneontology.org/cgi-bin/amigo/term_details?term=GO:0008047
cellular glucose homeostasis	Gene Ontology	GO:0001678	2	127	0.00252437	0.00896358	http://amigo.geneontology.org/cgi-bin/amigo/term_details?term=GO:0001678
positive regulation of protein localization to nucleus	Gene Ontology	GO:1900182	2	127	0.00252437	0.00896358	http://amigo.geneontology.org/cgi-bin/amigo/term_details?term=GO:1900182
growth factor receptor binding	Gene Ontology	GO:0070851	2	127	0.00252437	0.00896358	http://amigo.geneontology.org/cgi-bin/amigo/term_details?term=GO:0070851
positive regulation of nitrogen compound metabolic process	Gene Ontology	GO:0051173	5	1699	0.00252762	0.00896358	http://amigo.geneontology.org/cgi-bin/amigo/term_details?term=GO:0051173
cellular response to fibroblast growth factor stimulus	Gene Ontology	GO:0044344	2	128	0.00256291	0.00906181	http://amigo.geneontology.org/cgi-bin/amigo/term_details?term=GO:0044344
positive regulation of biosynthetic process	Gene Ontology	GO:0009891	5	1705	0.00256658	0.00906181	http://amigo.geneontology.org/cgi-bin/amigo/term_details?term=GO:0009891
tube formation	Gene Ontology	GO:0035148	2	131	0.00268021	0.00944233	http://amigo.geneontology.org/cgi-bin/amigo/term_details?term=GO:0035148
regulation of transcription, DNA-templated	Gene Ontology	GO:0006355	7	3490	0.00279254	0.00981656	http://amigo.geneontology.org/cgi-bin/amigo/term_details?term=GO:0006355
response to fibroblast growth factor	Gene Ontology	GO:0071774	2	134	0.00280001	0.00982139	http://amigo.geneontology.org/cgi-bin/amigo/term_details?term=GO:0071774
regulation of nucleic acid-templated transcription	Gene Ontology	GO:1903506	7	3509	0.00288014	0.0100805	http://amigo.geneontology.org/cgi-bin/amigo/term_details?term=GO:1903506
organic substance transport	Gene Ontology	GO:0071702	6	2585	0.00292179	0.0102041	http://amigo.geneontology.org/cgi-bin/amigo/term_details?term=GO:0071702
BMP signaling pathway	Gene Ontology	GO:0030509	2	138	0.0029636	0.0102884	http://amigo.geneontology.org/cgi-bin/amigo/term_details?term=GO:0030509
cellular response to metal ion	Gene Ontology	GO:0071248	2	138	0.0029636	0.0102884	http://amigo.geneontology.org/cgi-bin/amigo/term_details?term=GO:0071248
regulation of RNA biosynthetic process	Gene Ontology	GO:2001141	7	3527	0.0029651	0.0102884	http://amigo.geneontology.org/cgi-bin/amigo/term_details?term=GO:2001141
cellular response to lipid	Gene Ontology	GO:0071396	3	504	0.00301422	0.0104363	http://amigo.geneontology.org/cgi-bin/amigo/term_details?term=GO:0071396
response to inorganic substance	Gene Ontology	GO:0010035	3	505	0.00303099	0.0104719	http://amigo.geneontology.org/cgi-bin/amigo/term_details?term=GO:0010035
regulation of transport	Gene Ontology	GO:0051049	5	1774	0.00304691	0.0104824	http://amigo.geneontology.org/cgi-bin/amigo/term_details?term=GO:0051049
sensory perception of sound	Gene Ontology	GO:0007605	2	140	0.00304705	0.0104824	http://amigo.geneontology.org/cgi-bin/amigo/term_details?term=GO:0007605
morphogenesis of an epithelium	Gene Ontology	GO:0002009	3	507	0.0030647	0.0105206	http://amigo.geneontology.org/cgi-bin/amigo/term_details?term=GO:0002009
establishment of localization	Gene Ontology	GO:0051234	8	4583	0.00308896	0.0105373	http://amigo.geneontology.org/cgi-bin/amigo/term_details?term=GO:0051234
tissue remodeling	Gene Ontology	GO:0048771	2	141	0.00308919	0.0105373	http://amigo.geneontology.org/cgi-bin/amigo/term_details?term=GO:0048771
morphogenesis of embryonic epithelium	Gene Ontology	GO:0016331	2	141	0.00308919	0.0105373	http://amigo.geneontology.org/cgi-bin/amigo/term_details?term=GO:0016331
negative regulation of molecular function	Gene Ontology	GO:0044092	4	1072	0.00312576	0.0106395	http://amigo.geneontology.org/cgi-bin/amigo/term_details?term=GO:0044092
macromolecular complex	Gene Ontology	GO:0032991	8	4606	0.00318823	0.0108292	http://amigo.geneontology.org/cgi-bin/amigo/term_details?term=GO:0032991
lysosome	Gene Ontology	GO:0005764	3	515	0.00320184	0.0108297	http://amigo.geneontology.org/cgi-bin/amigo/term_details?term=GO:0005764
lytic vacuole	Gene Ontology	GO:0000323	3	515	0.00320184	0.0108297	http://amigo.geneontology.org/cgi-bin/amigo/term_details?term=GO:0000323
cardiac chamber development	Gene Ontology	GO:0003205	2	144	0.00321725	0.0108591	http://amigo.geneontology.org/cgi-bin/amigo/term_details?term=GO:0003205
neuron projection extension	Gene Ontology	GO:1990138	2	145	0.00326048	0.010982	http://amigo.geneontology.org/cgi-bin/amigo/term_details?term=GO:1990138
negative regulation of signal transduction	Gene Ontology	GO:0009968	4	1086	0.00327424	0.0110053	http://amigo.geneontology.org/cgi-bin/amigo/term_details?term=GO:0009968
regulation of cytokine secretion	Gene Ontology	GO:0050707	2	146	0.00330399	0.0110821	http://amigo.geneontology.org/cgi-bin/amigo/term_details?term=GO:0050707
branching morphogenesis of an epithelial tube	Gene Ontology	GO:0048754	2	147	0.00334776	0.0112056	http://amigo.geneontology.org/cgi-bin/amigo/term_details?term=GO:0048754
positive regulation of cell growth	Gene Ontology	GO:0030307	2	148	0.00339181	0.0112441	http://amigo.geneontology.org/cgi-bin/amigo/term_details?term=GO:0030307
response to estradiol	Gene Ontology	GO:0032355	2	148	0.00339181	0.0112441	http://amigo.geneontology.org/cgi-bin/amigo/term_details?term=GO:0032355
receptor-mediated virion attachment to host cell	Gene Ontology	GO:0046813	1	5	0.00346403	0.0112441	http://amigo.geneontology.org/cgi-bin/amigo/term_details?term=GO:0046813
regulation of osteoclast proliferation	Gene Ontology	GO:0090289	1	5	0.00346403	0.0112441	http://amigo.geneontology.org/cgi-bin/amigo/term_details?term=GO:0090289
response to vitamin K	Gene Ontology	GO:0032571	1	5	0.00346403	0.0112441	http://amigo.geneontology.org/cgi-bin/amigo/term_details?term=GO:0032571
regulation of bone mineralization involved in bone maturation	Gene Ontology	GO:1900157	1	5	0.00346403	0.0112441	http://amigo.geneontology.org/cgi-bin/amigo/term_details?term=GO:1900157
collagen binding involved in cell-matrix adhesion	Gene Ontology	GO:0098639	1	5	0.00346403	0.0112441	http://amigo.geneontology.org/cgi-bin/amigo/term_details?term=GO:0098639
interleukin-2 receptor binding	Gene Ontology	GO:0005134	1	5	0.00346403	0.0112441	http://amigo.geneontology.org/cgi-bin/amigo/term_details?term=GO:0005134
negative regulation of non-canonical Wnt signaling pathway	Gene Ontology	GO:2000051	1	5	0.00346403	0.0112441	http://amigo.geneontology.org/cgi-bin/amigo/term_details?term=GO:2000051
negative regulation of monocyte chemotaxis	Gene Ontology	GO:0090027	1	5	0.00346403	0.0112441	http://amigo.geneontology.org/cgi-bin/amigo/term_details?term=GO:0090027
cellular response to cobalt ion	Gene Ontology	GO:0071279	1	5	0.00346403	0.0112441	http://amigo.geneontology.org/cgi-bin/amigo/term_details?term=GO:0071279
positive regulation of chemokine (C-X-C motif) ligand 2 production	Gene Ontology	GO:2000343	1	5	0.00346403	0.0112441	http://amigo.geneontology.org/cgi-bin/amigo/term_details?term=GO:2000343
positive regulation of transcription from RNA polymerase II promoter involved in heart development	Gene Ontology	GO:1901228	1	5	0.00346403	0.0112441	http://amigo.geneontology.org/cgi-bin/amigo/term_details?term=GO:1901228
sclerotome development	Gene Ontology	GO:0061056	1	5	0.00346403	0.0112441	http://amigo.geneontology.org/cgi-bin/amigo/term_details?term=GO:0061056
substrate-dependent cell migration, cell attachment to substrate	Gene Ontology	GO:0006931	1	5	0.00346403	0.0112441	http://amigo.geneontology.org/cgi-bin/amigo/term_details?term=GO:0006931
protein phosphorylation	Gene Ontology	GO:0006468	5	1832	0.00349895	0.0113346	http://amigo.geneontology.org/cgi-bin/amigo/term_details?term=GO:0006468
regulation of leukocyte migration	Gene Ontology	GO:0002685	2	151	0.0035256	0.0113819	http://amigo.geneontology.org/cgi-bin/amigo/term_details?term=GO:0002685
regulation of RNA metabolic process	Gene Ontology	GO:0051252	7	3637	0.00352769	0.0113819	http://amigo.geneontology.org/cgi-bin/amigo/term_details?term=GO:0051252
regulation of cell projection organization	Gene Ontology	GO:0031344	3	534	0.00354258	0.0114071	http://amigo.geneontology.org/cgi-bin/amigo/term_details?term=GO:0031344
negative regulation of phosphate metabolic process	Gene Ontology	GO:0045936	3	535	0.00356111	0.0114211	http://amigo.geneontology.org/cgi-bin/amigo/term_details?term=GO:0045936
negative regulation of phosphorus metabolic process	Gene Ontology	GO:0010563	3	535	0.00356111	0.0114211	http://amigo.geneontology.org/cgi-bin/amigo/term_details?term=GO:0010563
positive regulation of Wnt signaling pathway	Gene Ontology	GO:0030177	2	152	0.00357073	0.0114292	http://amigo.geneontology.org/cgi-bin/amigo/term_details?term=GO:0030177
transcription, DNA-templated	Gene Ontology	GO:0006351	7	3648	0.00358821	0.0114623	http://amigo.geneontology.org/cgi-bin/amigo/term_details?term=GO:0006351
positive regulation of peptidase activity	Gene Ontology	GO:0010952	2	153	0.00361614	0.0115287	http://amigo.geneontology.org/cgi-bin/amigo/term_details?term=GO:0010952
nucleic acid-templated transcription	Gene Ontology	GO:0097659	7	3662	0.00366641	0.0116658	http://amigo.geneontology.org/cgi-bin/amigo/term_details?term=GO:0097659
sensory perception of mechanical stimulus	Gene Ontology	GO:0050954	2	155	0.00370777	0.0117742	http://amigo.geneontology.org/cgi-bin/amigo/term_details?term=GO:0050954
cellular response to inorganic substance	Gene Ontology	GO:0071241	2	159	0.00389426	0.0123072	http://amigo.geneontology.org/cgi-bin/amigo/term_details?term=GO:0071241
cell surface receptor signaling pathway involved in cell-cell signaling	Gene Ontology	GO:1905114	3	556	0.00396403	0.0123072	http://amigo.geneontology.org/cgi-bin/amigo/term_details?term=GO:1905114
glycosaminoglycan metabolic process	Gene Ontology	GO:0030203	2	161	0.00398912	0.0123072	http://amigo.geneontology.org/cgi-bin/amigo/term_details?term=GO:0030203
macromolecule catabolic process	Gene Ontology	GO:0009057	4	1149	0.00400269	0.0123072	http://amigo.geneontology.org/cgi-bin/amigo/term_details?term=GO:0009057
positive regulation of cell morphogenesis involved in differentiation	Gene Ontology	GO:0010770	2	162	0.00403696	0.0123072	http://amigo.geneontology.org/cgi-bin/amigo/term_details?term=GO:0010770
negative regulation of canonical Wnt signaling pathway	Gene Ontology	GO:0090090	2	162	0.00403696	0.0123072	http://amigo.geneontology.org/cgi-bin/amigo/term_details?term=GO:0090090
negative regulation of cell fate specification	Gene Ontology	GO:0009996	1	6	0.00404025	0.0123072	http://amigo.geneontology.org/cgi-bin/amigo/term_details?term=GO:0009996
protein binding involved in cell-matrix adhesion	Gene Ontology	GO:0098634	1	6	0.00404025	0.0123072	http://amigo.geneontology.org/cgi-bin/amigo/term_details?term=GO:0098634
ureteric bud formation	Gene Ontology	GO:0060676	1	6	0.00404025	0.0123072	http://amigo.geneontology.org/cgi-bin/amigo/term_details?term=GO:0060676
integrin biosynthetic process	Gene Ontology	GO:0045112	1	6	0.00404025	0.0123072	http://amigo.geneontology.org/cgi-bin/amigo/term_details?term=GO:0045112
midbrain morphogenesis	Gene Ontology	GO:1904693	1	6	0.00404025	0.0123072	http://amigo.geneontology.org/cgi-bin/amigo/term_details?term=GO:1904693
negative regulation of epithelial cell proliferation involved in prostate gland development	Gene Ontology	GO:0060770	1	6	0.00404025	0.0123072	http://amigo.geneontology.org/cgi-bin/amigo/term_details?term=GO:0060770
vascular endothelial growth factor receptor 2 binding	Gene Ontology	GO:0043184	1	6	0.00404025	0.0123072	http://amigo.geneontology.org/cgi-bin/amigo/term_details?term=GO:0043184
positive regulation of transforming growth factor beta1 production	Gene Ontology	GO:0032914	1	6	0.00404025	0.0123072	http://amigo.geneontology.org/cgi-bin/amigo/term_details?term=GO:0032914
invadopodium membrane	Gene Ontology	GO:0071438	1	6	0.00404025	0.0123072	http://amigo.geneontology.org/cgi-bin/amigo/term_details?term=GO:0071438
negative regulation of extracellular matrix organization	Gene Ontology	GO:1903054	1	6	0.00404025	0.0123072	http://amigo.geneontology.org/cgi-bin/amigo/term_details?term=GO:1903054
planar cell polarity pathway involved in axis elongation	Gene Ontology	GO:0003402	1	6	0.00404025	0.0123072	http://amigo.geneontology.org/cgi-bin/amigo/term_details?term=GO:0003402
transmembrane receptor protein tyrosine kinase activator activity	Gene Ontology	GO:0030297	1	6	0.00404025	0.0123072	http://amigo.geneontology.org/cgi-bin/amigo/term_details?term=GO:0030297
endopeptidase activator activity	Gene Ontology	GO:0061133	1	6	0.00404025	0.0123072	http://amigo.geneontology.org/cgi-bin/amigo/term_details?term=GO:0061133
negative regulation of mesonephros development	Gene Ontology	GO:0061218	1	6	0.00404025	0.0123072	http://amigo.geneontology.org/cgi-bin/amigo/term_details?term=GO:0061218
positive regulation of cellular metabolic process	Gene Ontology	GO:0031325	6	2759	0.00404097	0.0123072	http://amigo.geneontology.org/cgi-bin/amigo/term_details?term=GO:0031325
regulation of cytokine production	Gene Ontology	GO:0001817	3	560	0.00404381	0.0123072	http://amigo.geneontology.org/cgi-bin/amigo/term_details?term=GO:0001817
positive regulation of macromolecule metabolic process	Gene Ontology	GO:0010604	6	2767	0.00409921	0.0124523	http://amigo.geneontology.org/cgi-bin/amigo/term_details?term=GO:0010604
regulation of molecular function	Gene Ontology	GO:0065009	6	2773	0.0041433	0.0125438	http://amigo.geneontology.org/cgi-bin/amigo/term_details?term=GO:0065009
developmental growth	Gene Ontology	GO:0048589	3	565	0.0041449	0.0125438	http://amigo.geneontology.org/cgi-bin/amigo/term_details?term=GO:0048589
negative regulation of protein modification process	Gene Ontology	GO:0031400	3	566	0.00416531	0.0125819	http://amigo.geneontology.org/cgi-bin/amigo/term_details?term=GO:0031400
cell death	Gene Ontology	GO:0008219	5	1914	0.00421886	0.0127198	http://amigo.geneontology.org/cgi-bin/amigo/term_details?term=GO:0008219
cellular response to nutrient levels	Gene Ontology	GO:0031669	2	166	0.00423097	0.0127324	http://amigo.geneontology.org/cgi-bin/amigo/term_details?term=GO:0031669
cellular macromolecule biosynthetic process	Gene Ontology	GO:0034645	8	4820	0.00423895	0.0127327	http://amigo.geneontology.org/cgi-bin/amigo/term_details?term=GO:0034645
system process	Gene Ontology	GO:0003008	5	1918	0.00425652	0.0127616	http://amigo.geneontology.org/cgi-bin/amigo/term_details?term=GO:0003008
cytokine secretion	Gene Ontology	GO:0050663	2	167	0.00428014	0.0127848	http://amigo.geneontology.org/cgi-bin/amigo/term_details?term=GO:0050663
response to glucocorticoid	Gene Ontology	GO:0051384	2	167	0.00428014	0.0127848	http://amigo.geneontology.org/cgi-bin/amigo/term_details?term=GO:0051384
cardiac muscle tissue development	Gene Ontology	GO:0048738	2	168	0.00432957	0.0128609	http://amigo.geneontology.org/cgi-bin/amigo/term_details?term=GO:0048738
endopeptidase regulator activity	Gene Ontology	GO:0061135	2	168	0.00432957	0.0128609	http://amigo.geneontology.org/cgi-bin/amigo/term_details?term=GO:0061135
aminoglycan metabolic process	Gene Ontology	GO:0006022	2	168	0.00432957	0.0128609	http://amigo.geneontology.org/cgi-bin/amigo/term_details?term=GO:0006022
organic substance biosynthetic process	Gene Ontology	GO:1901576	9	5991	0.00437608	0.0129607	http://amigo.geneontology.org/cgi-bin/amigo/term_details?term=GO:1901576
negative regulation of cell growth	Gene Ontology	GO:0030308	2	169	0.00437928	0.0129607	http://amigo.geneontology.org/cgi-bin/amigo/term_details?term=GO:0030308
RNA biosynthetic process	Gene Ontology	GO:0032774	7	3783	0.00439875	0.0129945	http://amigo.geneontology.org/cgi-bin/amigo/term_details?term=GO:0032774
carbohydrate derivative catabolic process	Gene Ontology	GO:1901136	2	170	0.00442924	0.0130606	http://amigo.geneontology.org/cgi-bin/amigo/term_details?term=GO:1901136
protein kinase regulator activity	Gene Ontology	GO:0019887	2	171	0.00447948	0.0131846	http://amigo.geneontology.org/cgi-bin/amigo/term_details?term=GO:0019887
inner ear development	Gene Ontology	GO:0048839	2	172	0.00452998	0.0132714	http://amigo.geneontology.org/cgi-bin/amigo/term_details?term=GO:0048839
negative regulation of cell communication	Gene Ontology	GO:0010648	4	1190	0.00453205	0.0132714	http://amigo.geneontology.org/cgi-bin/amigo/term_details?term=GO:0010648
negative regulation of signaling	Gene Ontology	GO:0023057	4	1194	0.00458612	0.0132714	http://amigo.geneontology.org/cgi-bin/amigo/term_details?term=GO:0023057
negative regulation of mesoderm development	Gene Ontology	GO:2000381	1	7	0.00461615	0.0132714	http://amigo.geneontology.org/cgi-bin/amigo/term_details?term=GO:2000381
regulation of chemokine (C-X-C motif) ligand 2 production	Gene Ontology	GO:2000341	1	7	0.00461615	0.0132714	http://amigo.geneontology.org/cgi-bin/amigo/term_details?term=GO:2000341
network-forming collagen trimer	Gene Ontology	GO:0098642	1	7	0.00461615	0.0132714	http://amigo.geneontology.org/cgi-bin/amigo/term_details?term=GO:0098642
axon hillock	Gene Ontology	GO:0043203	1	7	0.00461615	0.0132714	http://amigo.geneontology.org/cgi-bin/amigo/term_details?term=GO:0043203
collagen network	Gene Ontology	GO:0098645	1	7	0.00461615	0.0132714	http://amigo.geneontology.org/cgi-bin/amigo/term_details?term=GO:0098645
regulation of dopaminergic neuron differentiation	Gene Ontology	GO:1904338	1	7	0.00461615	0.0132714	http://amigo.geneontology.org/cgi-bin/amigo/term_details?term=GO:1904338
response to ozone	Gene Ontology	GO:0010193	1	7	0.00461615	0.0132714	http://amigo.geneontology.org/cgi-bin/amigo/term_details?term=GO:0010193
regulation of transcription from RNA polymerase II promoter involved in myocardial precursor cell differentiation	Gene Ontology	GO:0003256	1	7	0.00461615	0.0132714	http://amigo.geneontology.org/cgi-bin/amigo/term_details?term=GO:0003256
convergent extension involved in axis elongation	Gene Ontology	GO:0060028	1	7	0.00461615	0.0132714	http://amigo.geneontology.org/cgi-bin/amigo/term_details?term=GO:0060028
regulation of mesodermal cell fate specification	Gene Ontology	GO:0042661	1	7	0.00461615	0.0132714	http://amigo.geneontology.org/cgi-bin/amigo/term_details?term=GO:0042661
regulation of morphogenesis of an epithelium	Gene Ontology	GO:1905330	2	174	0.00463177	0.0132926	http://amigo.geneontology.org/cgi-bin/amigo/term_details?term=GO:1905330
peptidase activity, acting on L-amino acid peptides	Gene Ontology	GO:0070011	3	597	0.00482862	0.0137877	http://amigo.geneontology.org/cgi-bin/amigo/term_details?term=GO:0070011
single-organism localization	Gene Ontology	GO:1902578	6	2861	0.00483191	0.0137877	http://amigo.geneontology.org/cgi-bin/amigo/term_details?term=GO:1902578
response to glucose	Gene Ontology	GO:0009749	2	178	0.00483853	0.0137877	http://amigo.geneontology.org/cgi-bin/amigo/term_details?term=GO:0009749
regulation of protein import into nucleus	Gene Ontology	GO:0042306	2	178	0.00483853	0.0137877	http://amigo.geneontology.org/cgi-bin/amigo/term_details?term=GO:0042306
biosynthetic process	Gene Ontology	GO:0009058	9	6087	0.00487856	0.0138772	http://amigo.geneontology.org/cgi-bin/amigo/term_details?term=GO:0009058
morphogenesis of a branching epithelium	Gene Ontology	GO:0061138	2	179	0.00489087	0.0138877	http://amigo.geneontology.org/cgi-bin/amigo/term_details?term=GO:0061138
cell projection organization	Gene Ontology	GO:0030030	4	1217	0.00490555	0.0139048	http://amigo.geneontology.org/cgi-bin/amigo/term_details?term=GO:0030030
regulation of cellular macromolecule biosynthetic process	Gene Ontology	GO:2000112	7	3865	0.00495597	0.014023	http://amigo.geneontology.org/cgi-bin/amigo/term_details?term=GO:2000112
serine-type endopeptidase activity	Gene Ontology	GO:0004252	2	181	0.00499636	0.0141125	http://amigo.geneontology.org/cgi-bin/amigo/term_details?term=GO:0004252
neurological system process	Gene Ontology	GO:0050877	4	1227	0.00504902	0.0141632	http://amigo.geneontology.org/cgi-bin/amigo/term_details?term=GO:0050877
positive regulation of I-kappaB kinase/NF-kappaB signaling	Gene Ontology	GO:0043123	2	182	0.00504949	0.0141632	http://amigo.geneontology.org/cgi-bin/amigo/term_details?term=GO:0043123
regulation of chemotaxis	Gene Ontology	GO:0050920	2	182	0.00504949	0.0141632	http://amigo.geneontology.org/cgi-bin/amigo/term_details?term=GO:0050920
regulation of protein import	Gene Ontology	GO:1904589	2	182	0.00504949	0.0141632	http://amigo.geneontology.org/cgi-bin/amigo/term_details?term=GO:1904589
response to hexose	Gene Ontology	GO:0009746	2	183	0.00510289	0.0142386	http://amigo.geneontology.org/cgi-bin/amigo/term_details?term=GO:0009746
metallopeptidase activity	Gene Ontology	GO:0008237	2	183	0.00510289	0.0142386	http://amigo.geneontology.org/cgi-bin/amigo/term_details?term=GO:0008237
regeneration	Gene Ontology	GO:0031099	2	183	0.00510289	0.0142386	http://amigo.geneontology.org/cgi-bin/amigo/term_details?term=GO:0031099
short-term memory	Gene Ontology	GO:0007614	1	8	0.00519173	0.0143867	http://amigo.geneontology.org/cgi-bin/amigo/term_details?term=GO:0007614
morphogen activity	Gene Ontology	GO:0016015	1	8	0.00519173	0.0143867	http://amigo.geneontology.org/cgi-bin/amigo/term_details?term=GO:0016015
osteoclast proliferation	Gene Ontology	GO:0002158	1	8	0.00519173	0.0143867	http://amigo.geneontology.org/cgi-bin/amigo/term_details?term=GO:0002158
basement membrane collagen trimer	Gene Ontology	GO:0098651	1	8	0.00519173	0.0143867	http://amigo.geneontology.org/cgi-bin/amigo/term_details?term=GO:0098651
developmental cell growth	Gene Ontology	GO:0048588	2	186	0.00526465	0.0145637	http://amigo.geneontology.org/cgi-bin/amigo/term_details?term=GO:0048588
peptidase activity	Gene Ontology	GO:0008233	3	617	0.00528873	0.0146052	http://amigo.geneontology.org/cgi-bin/amigo/term_details?term=GO:0008233
cytokine production	Gene Ontology	GO:0001816	3	619	0.00533615	0.014711	http://amigo.geneontology.org/cgi-bin/amigo/term_details?term=GO:0001816
cell junction assembly	Gene Ontology	GO:0034329	2	189	0.00542876	0.0149152	http://amigo.geneontology.org/cgi-bin/amigo/term_details?term=GO:0034329
kinase regulator activity	Gene Ontology	GO:0019207	2	189	0.00542876	0.0149152	http://amigo.geneontology.org/cgi-bin/amigo/term_details?term=GO:0019207
response to monosaccharide	Gene Ontology	GO:0034284	2	190	0.00548399	0.0150413	http://amigo.geneontology.org/cgi-bin/amigo/term_details?term=GO:0034284
regulation of growth	Gene Ontology	GO:0040008	3	629	0.00557712	0.0152461	http://amigo.geneontology.org/cgi-bin/amigo/term_details?term=GO:0040008
morphogenesis of a branching structure	Gene Ontology	GO:0001763	2	193	0.00565122	0.0152461	http://amigo.geneontology.org/cgi-bin/amigo/term_details?term=GO:0001763
positive regulation of metabolic process	Gene Ontology	GO:0009893	6	2962	0.00572418	0.0152461	http://amigo.geneontology.org/cgi-bin/amigo/term_details?term=GO:0009893
cellular component disassembly	Gene Ontology	GO:0022411	3	635	0.00572481	0.0152461	http://amigo.geneontology.org/cgi-bin/amigo/term_details?term=GO:0022411
regulation of nucleobase-containing compound metabolic process	Gene Ontology	GO:0019219	7	3972	0.00576304	0.0152461	http://amigo.geneontology.org/cgi-bin/amigo/term_details?term=GO:0019219
mesonephric tubule formation	Gene Ontology	GO:0072172	1	9	0.005767	0.0152461	http://amigo.geneontology.org/cgi-bin/amigo/term_details?term=GO:0072172
fibrinogen complex	Gene Ontology	GO:0005577	1	9	0.005767	0.0152461	http://amigo.geneontology.org/cgi-bin/amigo/term_details?term=GO:0005577
determination of dorsal/ventral asymmetry	Gene Ontology	GO:0048262	1	9	0.005767	0.0152461	http://amigo.geneontology.org/cgi-bin/amigo/term_details?term=GO:0048262
negative regulation of osteoblast proliferation	Gene Ontology	GO:0033689	1	9	0.005767	0.0152461	http://amigo.geneontology.org/cgi-bin/amigo/term_details?term=GO:0033689
adhesion of symbiont to host cell	Gene Ontology	GO:0044650	1	9	0.005767	0.0152461	http://amigo.geneontology.org/cgi-bin/amigo/term_details?term=GO:0044650
virion attachment to host cell	Gene Ontology	GO:0019062	1	9	0.005767	0.0152461	http://amigo.geneontology.org/cgi-bin/amigo/term_details?term=GO:0019062
transforming growth factor beta1 production	Gene Ontology	GO:0032905	1	9	0.005767	0.0152461	http://amigo.geneontology.org/cgi-bin/amigo/term_details?term=GO:0032905
determination of dorsal identity	Gene Ontology	GO:0048263	1	9	0.005767	0.0152461	http://amigo.geneontology.org/cgi-bin/amigo/term_details?term=GO:0048263
negative regulation of bone development	Gene Ontology	GO:1903011	1	9	0.005767	0.0152461	http://amigo.geneontology.org/cgi-bin/amigo/term_details?term=GO:1903011
chemokine (C-X-C motif) ligand 2 production	Gene Ontology	GO:0072567	1	9	0.005767	0.0152461	http://amigo.geneontology.org/cgi-bin/amigo/term_details?term=GO:0072567
neuron fate determination	Gene Ontology	GO:0048664	1	9	0.005767	0.0152461	http://amigo.geneontology.org/cgi-bin/amigo/term_details?term=GO:0048664
skin morphogenesis	Gene Ontology	GO:0043589	1	9	0.005767	0.0152461	http://amigo.geneontology.org/cgi-bin/amigo/term_details?term=GO:0043589
regulation of transforming growth factor beta1 production	Gene Ontology	GO:0032908	1	9	0.005767	0.0152461	http://amigo.geneontology.org/cgi-bin/amigo/term_details?term=GO:0032908
regulation of epithelial cell proliferation involved in prostate gland development	Gene Ontology	GO:0060768	1	9	0.005767	0.0152461	http://amigo.geneontology.org/cgi-bin/amigo/term_details?term=GO:0060768
cellular response to X-ray	Gene Ontology	GO:0071481	1	9	0.005767	0.0152461	http://amigo.geneontology.org/cgi-bin/amigo/term_details?term=GO:0071481
Wnt signaling pathway involved in somitogenesis	Gene Ontology	GO:0090244	1	9	0.005767	0.0152461	http://amigo.geneontology.org/cgi-bin/amigo/term_details?term=GO:0090244
contact inhibition	Gene Ontology	GO:0060242	1	9	0.005767	0.0152461	http://amigo.geneontology.org/cgi-bin/amigo/term_details?term=GO:0060242
regulation of macromolecule biosynthetic process	Gene Ontology	GO:0010556	7	3978	0.00581111	0.0153375	http://amigo.geneontology.org/cgi-bin/amigo/term_details?term=GO:0010556
negative regulation of Wnt signaling pathway	Gene Ontology	GO:0030178	2	196	0.00582077	0.0153379	http://amigo.geneontology.org/cgi-bin/amigo/term_details?term=GO:0030178
regulation of protein phosphorylation	Gene Ontology	GO:0001932	4	1281	0.00587319	0.0154376	http://amigo.geneontology.org/cgi-bin/amigo/term_details?term=GO:0001932
sulfur compound biosynthetic process	Gene Ontology	GO:0044272	2	197	0.00587781	0.0154376	http://amigo.geneontology.org/cgi-bin/amigo/term_details?term=GO:0044272
ear development	Gene Ontology	GO:0043583	2	198	0.0059351	0.0155627	http://amigo.geneontology.org/cgi-bin/amigo/term_details?term=GO:0043583
inflammatory response	Gene Ontology	GO:0006954	3	644	0.00595076	0.0155784	http://amigo.geneontology.org/cgi-bin/amigo/term_details?term=GO:0006954
establishment of protein localization to organelle	Gene Ontology	GO:0072594	3	649	0.00607858	0.0158872	http://amigo.geneontology.org/cgi-bin/amigo/term_details?term=GO:0072594
negative regulation of cell fate commitment	Gene Ontology	GO:0010454	1	10	0.00634194	0.0163666	http://amigo.geneontology.org/cgi-bin/amigo/term_details?term=GO:0010454
vascular endothelial growth factor receptor binding	Gene Ontology	GO:0005172	1	10	0.00634194	0.0163666	http://amigo.geneontology.org/cgi-bin/amigo/term_details?term=GO:0005172
BMP binding	Gene Ontology	GO:0036122	1	10	0.00634194	0.0163666	http://amigo.geneontology.org/cgi-bin/amigo/term_details?term=GO:0036122
regulation of transcription from RNA polymerase II promoter involved in heart development	Gene Ontology	GO:1901213	1	10	0.00634194	0.0163666	http://amigo.geneontology.org/cgi-bin/amigo/term_details?term=GO:1901213
epithelial cell proliferation involved in prostate gland development	Gene Ontology	GO:0060767	1	10	0.00634194	0.0163666	http://amigo.geneontology.org/cgi-bin/amigo/term_details?term=GO:0060767
bone mineralization involved in bone maturation	Gene Ontology	GO:0035630	1	10	0.00634194	0.0163666	http://amigo.geneontology.org/cgi-bin/amigo/term_details?term=GO:0035630
regulation of transmembrane receptor protein serine/threonine kinase signaling pathway	Gene Ontology	GO:0090092	2	205	0.00634334	0.0163666	http://amigo.geneontology.org/cgi-bin/amigo/term_details?term=GO:0090092
serine-type peptidase activity	Gene Ontology	GO:0008236	2	205	0.00634334	0.0163666	http://amigo.geneontology.org/cgi-bin/amigo/term_details?term=GO:0008236
regulation of hydrolase activity	Gene Ontology	GO:0051336	4	1316	0.0064532	0.0166202	http://amigo.geneontology.org/cgi-bin/amigo/term_details?term=GO:0051336
serine hydrolase activity	Gene Ontology	GO:0017171	2	207	0.00646228	0.0166202	http://amigo.geneontology.org/cgi-bin/amigo/term_details?term=GO:0017171
negative regulation of establishment of protein localization	Gene Ontology	GO:1904950	2	211	0.00670322	0.0172124	http://amigo.geneontology.org/cgi-bin/amigo/term_details?term=GO:1904950
glucose homeostasis	Gene Ontology	GO:0042593	2	214	0.00688659	0.0175089	http://amigo.geneontology.org/cgi-bin/amigo/term_details?term=GO:0042593
carbohydrate homeostasis	Gene Ontology	GO:0033500	2	214	0.00688659	0.0175089	http://amigo.geneontology.org/cgi-bin/amigo/term_details?term=GO:0033500
response to carbohydrate	Gene Ontology	GO:0009743	2	214	0.00688659	0.0175089	http://amigo.geneontology.org/cgi-bin/amigo/term_details?term=GO:0009743
positive regulation of catenin import into nucleus	Gene Ontology	GO:0035413	1	11	0.00691657	0.0175089	http://amigo.geneontology.org/cgi-bin/amigo/term_details?term=GO:0035413
keratan sulfate catabolic process	Gene Ontology	GO:0042340	1	11	0.00691657	0.0175089	http://amigo.geneontology.org/cgi-bin/amigo/term_details?term=GO:0042340
cardiac muscle cell myoblast differentiation	Gene Ontology	GO:0060379	1	11	0.00691657	0.0175089	http://amigo.geneontology.org/cgi-bin/amigo/term_details?term=GO:0060379
negative regulation of pathway-restricted SMAD protein phosphorylation	Gene Ontology	GO:0060394	1	11	0.00691657	0.0175089	http://amigo.geneontology.org/cgi-bin/amigo/term_details?term=GO:0060394
dipeptidyl-peptidase activity	Gene Ontology	GO:0008239	1	11	0.00691657	0.0175089	http://amigo.geneontology.org/cgi-bin/amigo/term_details?term=GO:0008239
positive regulation of chemokine secretion	Gene Ontology	GO:0090197	1	11	0.00691657	0.0175089	http://amigo.geneontology.org/cgi-bin/amigo/term_details?term=GO:0090197
response to reactive oxygen species	Gene Ontology	GO:0000302	2	215	0.00694822	0.0175614	http://amigo.geneontology.org/cgi-bin/amigo/term_details?term=GO:0000302
protein targeting	Gene Ontology	GO:0006605	3	682	0.00696378	0.0175732	http://amigo.geneontology.org/cgi-bin/amigo/term_details?term=GO:0006605
regulation of protein localization to nucleus	Gene Ontology	GO:1900180	2	216	0.0070101	0.0176348	http://amigo.geneontology.org/cgi-bin/amigo/term_details?term=GO:1900180
regulation of peptidyl-tyrosine phosphorylation	Gene Ontology	GO:0050730	2	216	0.0070101	0.0176348	http://amigo.geneontology.org/cgi-bin/amigo/term_details?term=GO:0050730
regulation of nucleocytoplasmic transport	Gene Ontology	GO:0046822	2	218	0.00713462	0.01792	http://amigo.geneontology.org/cgi-bin/amigo/term_details?term=GO:0046822
vacuolar part	Gene Ontology	GO:0044437	3	690	0.00718937	0.0180294	http://amigo.geneontology.org/cgi-bin/amigo/term_details?term=GO:0044437
negative regulation of cell adhesion	Gene Ontology	GO:0007162	2	220	0.00726014	0.0181786	http://amigo.geneontology.org/cgi-bin/amigo/term_details?term=GO:0007162
regulation of cellular biosynthetic process	Gene Ontology	GO:0031326	7	4157	0.00739171	0.0184127	http://amigo.geneontology.org/cgi-bin/amigo/term_details?term=GO:0031326
phosphorylation	Gene Ontology	GO:0016310	5	2190	0.00743352	0.0184127	http://amigo.geneontology.org/cgi-bin/amigo/term_details?term=GO:0016310
regulation of phosphorylation	Gene Ontology	GO:0042325	4	1371	0.00744042	0.0184127	http://amigo.geneontology.org/cgi-bin/amigo/term_details?term=GO:0042325
regulation of immune system process	Gene Ontology	GO:0002682	4	1372	0.00745925	0.0184127	http://amigo.geneontology.org/cgi-bin/amigo/term_details?term=GO:0002682
dermatan sulfate biosynthetic process	Gene Ontology	GO:0030208	1	12	0.00749088	0.0184127	http://amigo.geneontology.org/cgi-bin/amigo/term_details?term=GO:0030208
invadopodium	Gene Ontology	GO:0071437	1	12	0.00749088	0.0184127	http://amigo.geneontology.org/cgi-bin/amigo/term_details?term=GO:0071437
activation of transmembrane receptor protein tyrosine kinase activity	Gene Ontology	GO:0007171	1	12	0.00749088	0.0184127	http://amigo.geneontology.org/cgi-bin/amigo/term_details?term=GO:0007171
adhesion of symbiont to host	Gene Ontology	GO:0044406	1	12	0.00749088	0.0184127	http://amigo.geneontology.org/cgi-bin/amigo/term_details?term=GO:0044406
cardiac left ventricle morphogenesis	Gene Ontology	GO:0003214	1	12	0.00749088	0.0184127	http://amigo.geneontology.org/cgi-bin/amigo/term_details?term=GO:0003214
regulation of chemokine secretion	Gene Ontology	GO:0090196	1	12	0.00749088	0.0184127	http://amigo.geneontology.org/cgi-bin/amigo/term_details?term=GO:0090196
positive regulation of execution phase of apoptosis	Gene Ontology	GO:1900119	1	12	0.00749088	0.0184127	http://amigo.geneontology.org/cgi-bin/amigo/term_details?term=GO:1900119
regulation of Wnt signaling pathway, planar cell polarity pathway	Gene Ontology	GO:2000095	1	12	0.00749088	0.0184127	http://amigo.geneontology.org/cgi-bin/amigo/term_details?term=GO:2000095
regulation of apoptotic process	Gene Ontology	GO:0042981	4	1379	0.00759194	0.0186326	http://amigo.geneontology.org/cgi-bin/amigo/term_details?term=GO:0042981
regulation of cellular response to growth factor stimulus	Gene Ontology	GO:0090287	2	228	0.00777226	0.0190462	http://amigo.geneontology.org/cgi-bin/amigo/term_details?term=GO:0090287
regulation of programmed cell death	Gene Ontology	GO:0043067	4	1391	0.00782304	0.0191229	http://amigo.geneontology.org/cgi-bin/amigo/term_details?term=GO:0043067
negative regulation of endopeptidase activity	Gene Ontology	GO:0010951	2	229	0.0078374	0.0191229	http://amigo.geneontology.org/cgi-bin/amigo/term_details?term=GO:0010951
regulation of biosynthetic process	Gene Ontology	GO:0009889	7	4212	0.00793745	0.0191229	http://amigo.geneontology.org/cgi-bin/amigo/term_details?term=GO:0009889
regulation of protein kinase activity	Gene Ontology	GO:0045859	3	716	0.00795255	0.0191229	http://amigo.geneontology.org/cgi-bin/amigo/term_details?term=GO:0045859
gliogenesis	Gene Ontology	GO:0042063	2	231	0.00796842	0.0191229	http://amigo.geneontology.org/cgi-bin/amigo/term_details?term=GO:0042063
striated muscle cell differentiation	Gene Ontology	GO:0051146	2	231	0.00796842	0.0191229	http://amigo.geneontology.org/cgi-bin/amigo/term_details?term=GO:0051146
nucleobase-containing compound biosynthetic process	Gene Ontology	GO:0034654	7	4221	0.00802958	0.0191229	http://amigo.geneontology.org/cgi-bin/amigo/term_details?term=GO:0034654
positive regulation of neuron projection development	Gene Ontology	GO:0010976	2	232	0.0080343	0.0191229	http://amigo.geneontology.org/cgi-bin/amigo/term_details?term=GO:0010976
extracellular fibril organization	Gene Ontology	GO:0043206	1	13	0.00806488	0.0191229	http://amigo.geneontology.org/cgi-bin/amigo/term_details?term=GO:0043206
negative regulation of establishment of protein localization to plasma membrane	Gene Ontology	GO:0090005	1	13	0.00806488	0.0191229	http://amigo.geneontology.org/cgi-bin/amigo/term_details?term=GO:0090005
mitotic cell cycle arrest	Gene Ontology	GO:0071850	1	13	0.00806488	0.0191229	http://amigo.geneontology.org/cgi-bin/amigo/term_details?term=GO:0071850
mesenchymal to epithelial transition involved in metanephros morphogenesis	Gene Ontology	GO:0003337	1	13	0.00806488	0.0191229	http://amigo.geneontology.org/cgi-bin/amigo/term_details?term=GO:0003337
negative regulation of substrate adhesion-dependent cell spreading	Gene Ontology	GO:1900025	1	13	0.00806488	0.0191229	http://amigo.geneontology.org/cgi-bin/amigo/term_details?term=GO:1900025
planar cell polarity pathway involved in neural tube closure	Gene Ontology	GO:0090179	1	13	0.00806488	0.0191229	http://amigo.geneontology.org/cgi-bin/amigo/term_details?term=GO:0090179
regulation of cell fate specification	Gene Ontology	GO:0042659	1	13	0.00806488	0.0191229	http://amigo.geneontology.org/cgi-bin/amigo/term_details?term=GO:0042659
response to cobalt ion	Gene Ontology	GO:0032025	1	13	0.00806488	0.0191229	http://amigo.geneontology.org/cgi-bin/amigo/term_details?term=GO:0032025
negative regulation of bone remodeling	Gene Ontology	GO:0046851	1	13	0.00806488	0.0191229	http://amigo.geneontology.org/cgi-bin/amigo/term_details?term=GO:0046851
chemokine secretion	Gene Ontology	GO:0090195	1	13	0.00806488	0.0191229	http://amigo.geneontology.org/cgi-bin/amigo/term_details?term=GO:0090195
dermatan sulfate metabolic process	Gene Ontology	GO:0030205	1	13	0.00806488	0.0191229	http://amigo.geneontology.org/cgi-bin/amigo/term_details?term=GO:0030205
negative regulation of cardiac muscle cell apoptotic process	Gene Ontology	GO:0010667	1	13	0.00806488	0.0191229	http://amigo.geneontology.org/cgi-bin/amigo/term_details?term=GO:0010667
detection of mechanical stimulus involved in sensory perception of sound	Gene Ontology	GO:0050910	1	13	0.00806488	0.0191229	http://amigo.geneontology.org/cgi-bin/amigo/term_details?term=GO:0050910
positive regulation of cardiac muscle cell differentiation	Gene Ontology	GO:2000727	1	13	0.00806488	0.0191229	http://amigo.geneontology.org/cgi-bin/amigo/term_details?term=GO:2000727
negative regulation of protein kinase activity	Gene Ontology	GO:0006469	2	234	0.00816681	0.0193361	http://amigo.geneontology.org/cgi-bin/amigo/term_details?term=GO:0006469
negative regulation of growth	Gene Ontology	GO:0045926	2	235	0.00823343	0.0194652	http://amigo.geneontology.org/cgi-bin/amigo/term_details?term=GO:0045926
regulation of I-kappaB kinase/NF-kappaB signaling	Gene Ontology	GO:0043122	2	236	0.0083003	0.0195946	http://amigo.geneontology.org/cgi-bin/amigo/term_details?term=GO:0043122
positive regulation of growth	Gene Ontology	GO:0045927	2	238	0.00843478	0.0198829	http://amigo.geneontology.org/cgi-bin/amigo/term_details?term=GO:0045927
regulation of nitrogen compound metabolic process	Gene Ontology	GO:0051171	7	4264	0.008481	0.0199626	http://amigo.geneontology.org/cgi-bin/amigo/term_details?term=GO:0051171
heterocycle biosynthetic process	Gene Ontology	GO:0018130	7	4274	0.00858868	0.0200116	http://amigo.geneontology.org/cgi-bin/amigo/term_details?term=GO:0018130
Golgi apparatus	Gene Ontology	GO:0005794	4	1431	0.00862716	0.0200116	http://amigo.geneontology.org/cgi-bin/amigo/term_details?term=GO:0005794
negative regulation of JUN kinase activity	Gene Ontology	GO:0043508	1	14	0.00863855	0.0200116	http://amigo.geneontology.org/cgi-bin/amigo/term_details?term=GO:0043508
protein heterotrimerization	Gene Ontology	GO:0070208	1	14	0.00863855	0.0200116	http://amigo.geneontology.org/cgi-bin/amigo/term_details?term=GO:0070208
negative regulation of leukocyte chemotaxis	Gene Ontology	GO:0002689	1	14	0.00863855	0.0200116	http://amigo.geneontology.org/cgi-bin/amigo/term_details?term=GO:0002689
platelet dense granule lumen	Gene Ontology	GO:0031089	1	14	0.00863855	0.0200116	http://amigo.geneontology.org/cgi-bin/amigo/term_details?term=GO:0031089
chondroitin sulfate catabolic process	Gene Ontology	GO:0030207	1	14	0.00863855	0.0200116	http://amigo.geneontology.org/cgi-bin/amigo/term_details?term=GO:0030207
regulation of extracellular matrix disassembly	Gene Ontology	GO:0010715	1	14	0.00863855	0.0200116	http://amigo.geneontology.org/cgi-bin/amigo/term_details?term=GO:0010715
mesodermal cell fate specification	Gene Ontology	GO:0007501	1	14	0.00863855	0.0200116	http://amigo.geneontology.org/cgi-bin/amigo/term_details?term=GO:0007501
regulation of fibrinolysis	Gene Ontology	GO:0051917	1	14	0.00863855	0.0200116	http://amigo.geneontology.org/cgi-bin/amigo/term_details?term=GO:0051917
regulation of establishment of planar polarity involved in neural tube closure	Gene Ontology	GO:0090178	1	14	0.00863855	0.0200116	http://amigo.geneontology.org/cgi-bin/amigo/term_details?term=GO:0090178
aromatic compound biosynthetic process	Gene Ontology	GO:0019438	7	4287	0.00873019	0.0201948	http://amigo.geneontology.org/cgi-bin/amigo/term_details?term=GO:0019438
regulation of organ morphogenesis	Gene Ontology	GO:2000027	2	243	0.00877528	0.020212	http://amigo.geneontology.org/cgi-bin/amigo/term_details?term=GO:2000027
cell junction organization	Gene Ontology	GO:0034330	2	243	0.00877528	0.020212	http://amigo.geneontology.org/cgi-bin/amigo/term_details?term=GO:0034330
cell fate commitment	Gene Ontology	GO:0045165	2	243	0.00877528	0.020212	http://amigo.geneontology.org/cgi-bin/amigo/term_details?term=GO:0045165
cellular response to tumor necrosis factor	Gene Ontology	GO:0071356	2	247	0.00905208	0.0208198	http://amigo.geneontology.org/cgi-bin/amigo/term_details?term=GO:0071356
negative regulation of gene expression	Gene Ontology	GO:0010629	4	1452	0.00907046	0.0208323	http://amigo.geneontology.org/cgi-bin/amigo/term_details?term=GO:0010629
establishment of planar polarity involved in neural tube closure	Gene Ontology	GO:0090177	1	15	0.00921191	0.0210073	http://amigo.geneontology.org/cgi-bin/amigo/term_details?term=GO:0090177
response to vitamin E	Gene Ontology	GO:0033197	1	15	0.00921191	0.0210073	http://amigo.geneontology.org/cgi-bin/amigo/term_details?term=GO:0033197
regulation of mesoderm development	Gene Ontology	GO:2000380	1	15	0.00921191	0.0210073	http://amigo.geneontology.org/cgi-bin/amigo/term_details?term=GO:2000380
dermatan sulfate proteoglycan biosynthetic process	Gene Ontology	GO:0050651	1	15	0.00921191	0.0210073	http://amigo.geneontology.org/cgi-bin/amigo/term_details?term=GO:0050651
convergent extension	Gene Ontology	GO:0060026	1	15	0.00921191	0.0210073	http://amigo.geneontology.org/cgi-bin/amigo/term_details?term=GO:0060026
negative regulation of kinase activity	Gene Ontology	GO:0033673	2	250	0.00926224	0.0210922	http://amigo.geneontology.org/cgi-bin/amigo/term_details?term=GO:0033673
regulation of kinase activity	Gene Ontology	GO:0043549	3	769	0.00965288	0.0219508	http://amigo.geneontology.org/cgi-bin/amigo/term_details?term=GO:0043549
plasma membrane organization	Gene Ontology	GO:0007009	2	257	0.00976109	0.0220332	http://amigo.geneontology.org/cgi-bin/amigo/term_details?term=GO:0007009
wound healing, spreading of epidermal cells	Gene Ontology	GO:0035313	1	16	0.00978495	0.0220332	http://amigo.geneontology.org/cgi-bin/amigo/term_details?term=GO:0035313
positive regulation of transforming growth factor beta production	Gene Ontology	GO:0071636	1	16	0.00978495	0.0220332	http://amigo.geneontology.org/cgi-bin/amigo/term_details?term=GO:0071636
endolysosome	Gene Ontology	GO:0036019	1	16	0.00978495	0.0220332	http://amigo.geneontology.org/cgi-bin/amigo/term_details?term=GO:0036019
dermatan sulfate proteoglycan metabolic process	Gene Ontology	GO:0050655	1	16	0.00978495	0.0220332	http://amigo.geneontology.org/cgi-bin/amigo/term_details?term=GO:0050655
response to mercury ion	Gene Ontology	GO:0046689	1	16	0.00978495	0.0220332	http://amigo.geneontology.org/cgi-bin/amigo/term_details?term=GO:0046689
metanephric renal vesicle morphogenesis	Gene Ontology	GO:0072283	1	16	0.00978495	0.0220332	http://amigo.geneontology.org/cgi-bin/amigo/term_details?term=GO:0072283
organic cyclic compound biosynthetic process	Gene Ontology	GO:1901362	7	4388	0.00989046	0.0222397	http://amigo.geneontology.org/cgi-bin/amigo/term_details?term=GO:1901362
kidney development	Gene Ontology	GO:0001822	2	262	0.0101246	0.0227345	http://amigo.geneontology.org/cgi-bin/amigo/term_details?term=GO:0001822
I-kappaB kinase/NF-kappaB signaling	Gene Ontology	GO:0007249	2	263	0.0101981	0.0228675	http://amigo.geneontology.org/cgi-bin/amigo/term_details?term=GO:0007249
negative regulation of kidney development	Gene Ontology	GO:0090185	1	17	0.0103577	0.022875	http://amigo.geneontology.org/cgi-bin/amigo/term_details?term=GO:0090185
protein tyrosine kinase activator activity	Gene Ontology	GO:0030296	1	17	0.0103577	0.022875	http://amigo.geneontology.org/cgi-bin/amigo/term_details?term=GO:0030296
cellular response to platelet-derived growth factor stimulus	Gene Ontology	GO:0036120	1	17	0.0103577	0.022875	http://amigo.geneontology.org/cgi-bin/amigo/term_details?term=GO:0036120
negative regulation of striated muscle cell apoptotic process	Gene Ontology	GO:0010664	1	17	0.0103577	0.022875	http://amigo.geneontology.org/cgi-bin/amigo/term_details?term=GO:0010664
protein binding involved in cell adhesion	Gene Ontology	GO:0098631	1	17	0.0103577	0.022875	http://amigo.geneontology.org/cgi-bin/amigo/term_details?term=GO:0098631
negative regulation of tissue remodeling	Gene Ontology	GO:0034104	1	17	0.0103577	0.022875	http://amigo.geneontology.org/cgi-bin/amigo/term_details?term=GO:0034104
ossification involved in bone maturation	Gene Ontology	GO:0043931	1	17	0.0103577	0.022875	http://amigo.geneontology.org/cgi-bin/amigo/term_details?term=GO:0043931
establishment of planar polarity of embryonic epithelium	Gene Ontology	GO:0042249	1	17	0.0103577	0.022875	http://amigo.geneontology.org/cgi-bin/amigo/term_details?term=GO:0042249
integrin activation	Gene Ontology	GO:0033622	1	17	0.0103577	0.022875	http://amigo.geneontology.org/cgi-bin/amigo/term_details?term=GO:0033622
negative regulation of morphogenesis of an epithelium	Gene Ontology	GO:1905331	1	17	0.0103577	0.022875	http://amigo.geneontology.org/cgi-bin/amigo/term_details?term=GO:1905331
positive regulation of cell adhesion mediated by integrin	Gene Ontology	GO:0033630	1	17	0.0103577	0.022875	http://amigo.geneontology.org/cgi-bin/amigo/term_details?term=GO:0033630
cellular catabolic process	Gene Ontology	GO:0044248	4	1513	0.010443	0.0230318	http://amigo.geneontology.org/cgi-bin/amigo/term_details?term=GO:0044248
response to tumor necrosis factor	Gene Ontology	GO:0034612	2	269	0.0106436	0.0234422	http://amigo.geneontology.org/cgi-bin/amigo/term_details?term=GO:0034612
cellular localization	Gene Ontology	GO:0051641	5	2394	0.0107206	0.0235777	http://amigo.geneontology.org/cgi-bin/amigo/term_details?term=GO:0051641
transport	Gene Ontology	GO:0006810	7	4456	0.0107344	0.0235777	http://amigo.geneontology.org/cgi-bin/amigo/term_details?term=GO:0006810
regulated exocytosis	Gene Ontology	GO:0045055	2	271	0.0107941	0.0236763	http://amigo.geneontology.org/cgi-bin/amigo/term_details?term=GO:0045055
HMG box domain binding	Gene Ontology	GO:0071837	1	18	0.0109301	0.0237803	http://amigo.geneontology.org/cgi-bin/amigo/term_details?term=GO:0071837
regulation of cardiac muscle cell differentiation	Gene Ontology	GO:2000725	1	18	0.0109301	0.0237803	http://amigo.geneontology.org/cgi-bin/amigo/term_details?term=GO:2000725
response to platelet-derived growth factor	Gene Ontology	GO:0036119	1	18	0.0109301	0.0237803	http://amigo.geneontology.org/cgi-bin/amigo/term_details?term=GO:0036119
regulation of epithelial tube formation	Gene Ontology	GO:1905276	1	18	0.0109301	0.0237803	http://amigo.geneontology.org/cgi-bin/amigo/term_details?term=GO:1905276
post-anal tail morphogenesis	Gene Ontology	GO:0036342	1	18	0.0109301	0.0237803	http://amigo.geneontology.org/cgi-bin/amigo/term_details?term=GO:0036342
cellular response to prostaglandin E stimulus	Gene Ontology	GO:0071380	1	18	0.0109301	0.0237803	http://amigo.geneontology.org/cgi-bin/amigo/term_details?term=GO:0071380
defense response	Gene Ontology	GO:0006952	4	1535	0.0109696	0.0238341	http://amigo.geneontology.org/cgi-bin/amigo/term_details?term=GO:0006952
negative regulation of apoptotic process	Gene Ontology	GO:0043066	3	808	0.0110305	0.0239341	http://amigo.geneontology.org/cgi-bin/amigo/term_details?term=GO:0043066
cytokine receptor binding	Gene Ontology	GO:0005126	2	275	0.0110978	0.0239459	http://amigo.geneontology.org/cgi-bin/amigo/term_details?term=GO:0005126
protein import into nucleus	Gene Ontology	GO:0006606	2	275	0.0110978	0.0239459	http://amigo.geneontology.org/cgi-bin/amigo/term_details?term=GO:0006606
single-organism nuclear import	Gene Ontology	GO:1902593	2	275	0.0110978	0.0239459	http://amigo.geneontology.org/cgi-bin/amigo/term_details?term=GO:1902593
protein targeting to nucleus	Gene Ontology	GO:0044744	2	275	0.0110978	0.0239459	http://amigo.geneontology.org/cgi-bin/amigo/term_details?term=GO:0044744
RNA metabolic process	Gene Ontology	GO:0016070	7	4485	0.0111103	0.0239459	http://amigo.geneontology.org/cgi-bin/amigo/term_details?term=GO:0016070
renal system development	Gene Ontology	GO:0072001	2	277	0.011251	0.0242168	http://amigo.geneontology.org/cgi-bin/amigo/term_details?term=GO:0072001
negative regulation of programmed cell death	Gene Ontology	GO:0043069	3	819	0.0114387	0.0243025	http://amigo.geneontology.org/cgi-bin/amigo/term_details?term=GO:0043069
mesenchymal to epithelial transition	Gene Ontology	GO:0060231	1	19	0.0115022	0.0243025	http://amigo.geneontology.org/cgi-bin/amigo/term_details?term=GO:0060231
renal vesicle morphogenesis	Gene Ontology	GO:0072077	1	19	0.0115022	0.0243025	http://amigo.geneontology.org/cgi-bin/amigo/term_details?term=GO:0072077
neuronal stem cell population maintenance	Gene Ontology	GO:0097150	1	19	0.0115022	0.0243025	http://amigo.geneontology.org/cgi-bin/amigo/term_details?term=GO:0097150
bone maturation	Gene Ontology	GO:0070977	1	19	0.0115022	0.0243025	http://amigo.geneontology.org/cgi-bin/amigo/term_details?term=GO:0070977
lamellipodium membrane	Gene Ontology	GO:0031258	1	19	0.0115022	0.0243025	http://amigo.geneontology.org/cgi-bin/amigo/term_details?term=GO:0031258
cardioblast differentiation	Gene Ontology	GO:0010002	1	19	0.0115022	0.0243025	http://amigo.geneontology.org/cgi-bin/amigo/term_details?term=GO:0010002
mesodermal cell fate commitment	Gene Ontology	GO:0001710	1	19	0.0115022	0.0243025	http://amigo.geneontology.org/cgi-bin/amigo/term_details?term=GO:0001710
regulation of cardiac muscle cell apoptotic process	Gene Ontology	GO:0010665	1	19	0.0115022	0.0243025	http://amigo.geneontology.org/cgi-bin/amigo/term_details?term=GO:0010665
regulation of bone development	Gene Ontology	GO:1903010	1	19	0.0115022	0.0243025	http://amigo.geneontology.org/cgi-bin/amigo/term_details?term=GO:1903010
positive regulation of cardiocyte differentiation	Gene Ontology	GO:1905209	1	19	0.0115022	0.0243025	http://amigo.geneontology.org/cgi-bin/amigo/term_details?term=GO:1905209
positive regulation of branching involved in ureteric bud morphogenesis	Gene Ontology	GO:0090190	1	19	0.0115022	0.0243025	http://amigo.geneontology.org/cgi-bin/amigo/term_details?term=GO:0090190
negative regulation of protein localization to plasma membrane	Gene Ontology	GO:1903077	1	19	0.0115022	0.0243025	http://amigo.geneontology.org/cgi-bin/amigo/term_details?term=GO:1903077
nephron tubule formation	Gene Ontology	GO:0072079	1	19	0.0115022	0.0243025	http://amigo.geneontology.org/cgi-bin/amigo/term_details?term=GO:0072079
embryonic organ morphogenesis	Gene Ontology	GO:0048562	2	281	0.0115604	0.0243934	http://amigo.geneontology.org/cgi-bin/amigo/term_details?term=GO:0048562
regulation of immune response	Gene Ontology	GO:0050776	3	824	0.0116271	0.0245022	http://amigo.geneontology.org/cgi-bin/amigo/term_details?term=GO:0050776
camera-type eye development	Gene Ontology	GO:0043010	2	285	0.0118734	0.0249886	http://amigo.geneontology.org/cgi-bin/amigo/term_details?term=GO:0043010
cellular response to abiotic stimulus	Gene Ontology	GO:0071214	2	287	0.0120314	0.0250181	http://amigo.geneontology.org/cgi-bin/amigo/term_details?term=GO:0071214
negative regulation of protein localization to cell periphery	Gene Ontology	GO:1904376	1	20	0.0120739	0.0250181	http://amigo.geneontology.org/cgi-bin/amigo/term_details?term=GO:1904376
regulation of non-canonical Wnt signaling pathway	Gene Ontology	GO:2000050	1	20	0.0120739	0.0250181	http://amigo.geneontology.org/cgi-bin/amigo/term_details?term=GO:2000050
tooth mineralization	Gene Ontology	GO:0034505	1	20	0.0120739	0.0250181	http://amigo.geneontology.org/cgi-bin/amigo/term_details?term=GO:0034505
hematopoietic stem cell proliferation	Gene Ontology	GO:0071425	1	20	0.0120739	0.0250181	http://amigo.geneontology.org/cgi-bin/amigo/term_details?term=GO:0071425
platelet dense granule	Gene Ontology	GO:0042827	1	20	0.0120739	0.0250181	http://amigo.geneontology.org/cgi-bin/amigo/term_details?term=GO:0042827
renal vesicle development	Gene Ontology	GO:0072087	1	20	0.0120739	0.0250181	http://amigo.geneontology.org/cgi-bin/amigo/term_details?term=GO:0072087
negative regulation of chondrocyte differentiation	Gene Ontology	GO:0032331	1	20	0.0120739	0.0250181	http://amigo.geneontology.org/cgi-bin/amigo/term_details?term=GO:0032331
middle ear morphogenesis	Gene Ontology	GO:0042474	1	20	0.0120739	0.0250181	http://amigo.geneontology.org/cgi-bin/amigo/term_details?term=GO:0042474
regulation of neuron projection regeneration	Gene Ontology	GO:0070570	1	20	0.0120739	0.0250181	http://amigo.geneontology.org/cgi-bin/amigo/term_details?term=GO:0070570
response to muscle activity	Gene Ontology	GO:0014850	1	20	0.0120739	0.0250181	http://amigo.geneontology.org/cgi-bin/amigo/term_details?term=GO:0014850
Wnt-activated receptor activity	Gene Ontology	GO:0042813	1	20	0.0120739	0.0250181	http://amigo.geneontology.org/cgi-bin/amigo/term_details?term=GO:0042813
regulation of developmental growth	Gene Ontology	GO:0048638	2	288	0.0121107	0.025062	http://amigo.geneontology.org/cgi-bin/amigo/term_details?term=GO:0048638
regulation of phosphate metabolic process	Gene Ontology	GO:0019220	4	1595	0.0124936	0.0258211	http://amigo.geneontology.org/cgi-bin/amigo/term_details?term=GO:0019220
regulation of phosphorus metabolic process	Gene Ontology	GO:0051174	4	1596	0.0125201	0.0258364	http://amigo.geneontology.org/cgi-bin/amigo/term_details?term=GO:0051174
nuclear import	Gene Ontology	GO:0051170	2	294	0.0125915	0.0258364	http://amigo.geneontology.org/cgi-bin/amigo/term_details?term=GO:0051170
hyaluronic acid binding	Gene Ontology	GO:0005540	1	21	0.0126454	0.0258364	http://amigo.geneontology.org/cgi-bin/amigo/term_details?term=GO:0005540
basal lamina	Gene Ontology	GO:0005605	1	21	0.0126454	0.0258364	http://amigo.geneontology.org/cgi-bin/amigo/term_details?term=GO:0005605
response to acidic pH	Gene Ontology	GO:0010447	1	21	0.0126454	0.0258364	http://amigo.geneontology.org/cgi-bin/amigo/term_details?term=GO:0010447
cell aggregation	Gene Ontology	GO:0098743	1	21	0.0126454	0.0258364	http://amigo.geneontology.org/cgi-bin/amigo/term_details?term=GO:0098743
cartilage condensation	Gene Ontology	GO:0001502	1	21	0.0126454	0.0258364	http://amigo.geneontology.org/cgi-bin/amigo/term_details?term=GO:0001502
regulation of monocyte chemotaxis	Gene Ontology	GO:0090025	1	21	0.0126454	0.0258364	http://amigo.geneontology.org/cgi-bin/amigo/term_details?term=GO:0090025
cartilage development involved in endochondral bone morphogenesis	Gene Ontology	GO:0060351	1	21	0.0126454	0.0258364	http://amigo.geneontology.org/cgi-bin/amigo/term_details?term=GO:0060351
response to hormone	Gene Ontology	GO:0009725	3	852	0.0127159	0.0259475	http://amigo.geneontology.org/cgi-bin/amigo/term_details?term=GO:0009725
negative regulation of cell development	Gene Ontology	GO:0010721	2	296	0.0127536	0.0259915	http://amigo.geneontology.org/cgi-bin/amigo/term_details?term=GO:0010721
positive regulation of protein autophosphorylation	Gene Ontology	GO:0031954	1	22	0.0132165	0.0267993	http://amigo.geneontology.org/cgi-bin/amigo/term_details?term=GO:0031954
positive regulation of mesonephros development	Gene Ontology	GO:0061213	1	22	0.0132165	0.0267993	http://amigo.geneontology.org/cgi-bin/amigo/term_details?term=GO:0061213
regulation of striated muscle cell apoptotic process	Gene Ontology	GO:0010662	1	22	0.0132165	0.0267993	http://amigo.geneontology.org/cgi-bin/amigo/term_details?term=GO:0010662
fibril organization	Gene Ontology	GO:0097435	1	22	0.0132165	0.0267993	http://amigo.geneontology.org/cgi-bin/amigo/term_details?term=GO:0097435
epithelial tube morphogenesis	Gene Ontology	GO:0060562	2	302	0.0132454	0.0268241	http://amigo.geneontology.org/cgi-bin/amigo/term_details?term=GO:0060562
positive regulation of cell projection organization	Gene Ontology	GO:0031346	2	307	0.0136616	0.0275974	http://amigo.geneontology.org/cgi-bin/amigo/term_details?term=GO:0031346
positive regulation of neuron differentiation	Gene Ontology	GO:0045666	2	307	0.0136616	0.0275974	http://amigo.geneontology.org/cgi-bin/amigo/term_details?term=GO:0045666
transmembrane receptor protein serine/threonine kinase signaling pathway	Gene Ontology	GO:0007178	2	308	0.0137455	0.027609	http://amigo.geneontology.org/cgi-bin/amigo/term_details?term=GO:0007178
regulation of protein modification process	Gene Ontology	GO:0031399	4	1641	0.0137508	0.027609	http://amigo.geneontology.org/cgi-bin/amigo/term_details?term=GO:0031399
negative regulation of epithelial to mesenchymal transition	Gene Ontology	GO:0010719	1	23	0.0137874	0.027609	http://amigo.geneontology.org/cgi-bin/amigo/term_details?term=GO:0010719
regulation of osteoblast proliferation	Gene Ontology	GO:0033688	1	23	0.0137874	0.027609	http://amigo.geneontology.org/cgi-bin/amigo/term_details?term=GO:0033688
regulation of execution phase of apoptosis	Gene Ontology	GO:1900117	1	23	0.0137874	0.027609	http://amigo.geneontology.org/cgi-bin/amigo/term_details?term=GO:1900117
regulation of branching involved in ureteric bud morphogenesis	Gene Ontology	GO:0090189	1	23	0.0137874	0.027609	http://amigo.geneontology.org/cgi-bin/amigo/term_details?term=GO:0090189
organ maturation	Gene Ontology	GO:0048799	1	23	0.0137874	0.027609	http://amigo.geneontology.org/cgi-bin/amigo/term_details?term=GO:0048799
Golgi apparatus part	Gene Ontology	GO:0044431	3	886	0.0141148	0.0282164	http://amigo.geneontology.org/cgi-bin/amigo/term_details?term=GO:0044431
cellular biosynthetic process	Gene Ontology	GO:0044249	8	5886	0.0141257	0.0282164	http://amigo.geneontology.org/cgi-bin/amigo/term_details?term=GO:0044249
urogenital system development	Gene Ontology	GO:0001655	2	314	0.0142537	0.0283983	http://amigo.geneontology.org/cgi-bin/amigo/term_details?term=GO:0001655
signal transducer activity	Gene Ontology	GO:0004871	4	1662	0.014351	0.0283983	http://amigo.geneontology.org/cgi-bin/amigo/term_details?term=GO:0004871
endosome lumen	Gene Ontology	GO:0031904	1	24	0.0143579	0.0283983	http://amigo.geneontology.org/cgi-bin/amigo/term_details?term=GO:0031904
regulation of T cell migration	Gene Ontology	GO:2000404	1	24	0.0143579	0.0283983	http://amigo.geneontology.org/cgi-bin/amigo/term_details?term=GO:2000404
cellular response to prostaglandin stimulus	Gene Ontology	GO:0071379	1	24	0.0143579	0.0283983	http://amigo.geneontology.org/cgi-bin/amigo/term_details?term=GO:0071379
positive regulation of smoothened signaling pathway	Gene Ontology	GO:0045880	1	24	0.0143579	0.0283983	http://amigo.geneontology.org/cgi-bin/amigo/term_details?term=GO:0045880
cardiac muscle cell apoptotic process	Gene Ontology	GO:0010659	1	24	0.0143579	0.0283983	http://amigo.geneontology.org/cgi-bin/amigo/term_details?term=GO:0010659
positive regulation of receptor internalization	Gene Ontology	GO:0002092	1	24	0.0143579	0.0283983	http://amigo.geneontology.org/cgi-bin/amigo/term_details?term=GO:0002092
intracellular signal transduction	Gene Ontology	GO:0035556	5	2598	0.0149076	0.0293411	http://amigo.geneontology.org/cgi-bin/amigo/term_details?term=GO:0035556
endochondral ossification	Gene Ontology	GO:0001958	1	25	0.0149281	0.0293411	http://amigo.geneontology.org/cgi-bin/amigo/term_details?term=GO:0001958
chondroitin sulfate biosynthetic process	Gene Ontology	GO:0030206	1	25	0.0149281	0.0293411	http://amigo.geneontology.org/cgi-bin/amigo/term_details?term=GO:0030206
replacement ossification	Gene Ontology	GO:0036075	1	25	0.0149281	0.0293411	http://amigo.geneontology.org/cgi-bin/amigo/term_details?term=GO:0036075
regulation of transforming growth factor beta production	Gene Ontology	GO:0071634	1	25	0.0149281	0.0293411	http://amigo.geneontology.org/cgi-bin/amigo/term_details?term=GO:0071634
protein import	Gene Ontology	GO:0017038	2	322	0.0149439	0.0293411	http://amigo.geneontology.org/cgi-bin/amigo/term_details?term=GO:0017038
sensory perception	Gene Ontology	GO:0007600	3	908	0.0150653	0.0295435	http://amigo.geneontology.org/cgi-bin/amigo/term_details?term=GO:0007600
response to oxygen levels	Gene Ontology	GO:0070482	2	325	0.0152065	0.0297839	http://amigo.geneontology.org/cgi-bin/amigo/term_details?term=GO:0070482
striated muscle tissue development	Gene Ontology	GO:0014706	2	326	0.0152944	0.0298465	http://amigo.geneontology.org/cgi-bin/amigo/term_details?term=GO:0014706
wound healing, spreading of cells	Gene Ontology	GO:0044319	1	26	0.015498	0.0298465	http://amigo.geneontology.org/cgi-bin/amigo/term_details?term=GO:0044319
negative regulation of cartilage development	Gene Ontology	GO:0061037	1	26	0.015498	0.0298465	http://amigo.geneontology.org/cgi-bin/amigo/term_details?term=GO:0061037
osteoblast proliferation	Gene Ontology	GO:0033687	1	26	0.015498	0.0298465	http://amigo.geneontology.org/cgi-bin/amigo/term_details?term=GO:0033687
regulation of catenin import into nucleus	Gene Ontology	GO:0035412	1	26	0.015498	0.0298465	http://amigo.geneontology.org/cgi-bin/amigo/term_details?term=GO:0035412
response to prostaglandin E	Gene Ontology	GO:0034695	1	26	0.015498	0.0298465	http://amigo.geneontology.org/cgi-bin/amigo/term_details?term=GO:0034695
cellular response to epidermal growth factor stimulus	Gene Ontology	GO:0071364	1	26	0.015498	0.0298465	http://amigo.geneontology.org/cgi-bin/amigo/term_details?term=GO:0071364
metanephric nephron morphogenesis	Gene Ontology	GO:0072273	1	26	0.015498	0.0298465	http://amigo.geneontology.org/cgi-bin/amigo/term_details?term=GO:0072273
regulation of type 2 immune response	Gene Ontology	GO:0002828	1	26	0.015498	0.0298465	http://amigo.geneontology.org/cgi-bin/amigo/term_details?term=GO:0002828
transforming growth factor beta production	Gene Ontology	GO:0071604	1	26	0.015498	0.0298465	http://amigo.geneontology.org/cgi-bin/amigo/term_details?term=GO:0071604
regulation of mesonephros development	Gene Ontology	GO:0061217	1	26	0.015498	0.0298465	http://amigo.geneontology.org/cgi-bin/amigo/term_details?term=GO:0061217
detection of mechanical stimulus involved in sensory perception	Gene Ontology	GO:0050974	1	26	0.015498	0.0298465	http://amigo.geneontology.org/cgi-bin/amigo/term_details?term=GO:0050974
epiboly involved in wound healing	Gene Ontology	GO:0090505	1	26	0.015498	0.0298465	http://amigo.geneontology.org/cgi-bin/amigo/term_details?term=GO:0090505
regulation of cell fate commitment	Gene Ontology	GO:0010453	1	26	0.015498	0.0298465	http://amigo.geneontology.org/cgi-bin/amigo/term_details?term=GO:0010453
regionalization	Gene Ontology	GO:0003002	2	329	0.0155596	0.0299295	http://amigo.geneontology.org/cgi-bin/amigo/term_details?term=GO:0003002
cellular nitrogen compound biosynthetic process	Gene Ontology	GO:0044271	7	4795	0.0157677	0.0302935	http://amigo.geneontology.org/cgi-bin/amigo/term_details?term=GO:0044271
regulation of transferase activity	Gene Ontology	GO:0051338	3	926	0.0158697	0.030398	http://amigo.geneontology.org/cgi-bin/amigo/term_details?term=GO:0051338
organonitrogen compound catabolic process	Gene Ontology	GO:1901565	2	334	0.016006	0.030398	http://amigo.geneontology.org/cgi-bin/amigo/term_details?term=GO:1901565
fibrinolysis	Gene Ontology	GO:0042730	1	27	0.0160675	0.030398	http://amigo.geneontology.org/cgi-bin/amigo/term_details?term=GO:0042730
epiboly	Gene Ontology	GO:0090504	1	27	0.0160675	0.030398	http://amigo.geneontology.org/cgi-bin/amigo/term_details?term=GO:0090504
cellular response to dexamethasone stimulus	Gene Ontology	GO:0071549	1	27	0.0160675	0.030398	http://amigo.geneontology.org/cgi-bin/amigo/term_details?term=GO:0071549
response to increased oxygen levels	Gene Ontology	GO:0036296	1	27	0.0160675	0.030398	http://amigo.geneontology.org/cgi-bin/amigo/term_details?term=GO:0036296
keratan sulfate biosynthetic process	Gene Ontology	GO:0018146	1	27	0.0160675	0.030398	http://amigo.geneontology.org/cgi-bin/amigo/term_details?term=GO:0018146
positive regulation of NF-kappaB import into nucleus	Gene Ontology	GO:0042346	1	27	0.0160675	0.030398	http://amigo.geneontology.org/cgi-bin/amigo/term_details?term=GO:0042346
response to hyperoxia	Gene Ontology	GO:0055093	1	27	0.0160675	0.030398	http://amigo.geneontology.org/cgi-bin/amigo/term_details?term=GO:0055093
positive regulation of mesenchymal cell proliferation	Gene Ontology	GO:0002053	1	27	0.0160675	0.030398	http://amigo.geneontology.org/cgi-bin/amigo/term_details?term=GO:0002053
regulation of cardiocyte differentiation	Gene Ontology	GO:1905207	1	27	0.0160675	0.030398	http://amigo.geneontology.org/cgi-bin/amigo/term_details?term=GO:1905207
negative regulation of intrinsic apoptotic signaling pathway in response to DNA damage	Gene Ontology	GO:1902230	1	27	0.0160675	0.030398	http://amigo.geneontology.org/cgi-bin/amigo/term_details?term=GO:1902230
striated muscle cell apoptotic process	Gene Ontology	GO:0010658	1	27	0.0160675	0.030398	http://amigo.geneontology.org/cgi-bin/amigo/term_details?term=GO:0010658
single-organism transport	Gene Ontology	GO:0044765	5	2654	0.0162283	0.0306662	http://amigo.geneontology.org/cgi-bin/amigo/term_details?term=GO:0044765
response to metal ion	Gene Ontology	GO:0010038	2	338	0.0163671	0.0308921	http://amigo.geneontology.org/cgi-bin/amigo/term_details?term=GO:0010038
tube morphogenesis	Gene Ontology	GO:0035239	2	339	0.0164579	0.0309692	http://amigo.geneontology.org/cgi-bin/amigo/term_details?term=GO:0035239
muscle tissue development	Gene Ontology	GO:0060537	2	339	0.0164579	0.0309692	http://amigo.geneontology.org/cgi-bin/amigo/term_details?term=GO:0060537
secretion by cell	Gene Ontology	GO:0032940	3	939	0.0164656	0.0309692	http://amigo.geneontology.org/cgi-bin/amigo/term_details?term=GO:0032940
muscle cell differentiation	Gene Ontology	GO:0042692	2	340	0.0165489	0.0310896	http://amigo.geneontology.org/cgi-bin/amigo/term_details?term=GO:0042692
positive regulation of telomerase activity	Gene Ontology	GO:0051973	1	28	0.0166368	0.0311818	http://amigo.geneontology.org/cgi-bin/amigo/term_details?term=GO:0051973
catenin import into nucleus	Gene Ontology	GO:0035411	1	28	0.0166368	0.0311818	http://amigo.geneontology.org/cgi-bin/amigo/term_details?term=GO:0035411
response to arsenic-containing substance	Gene Ontology	GO:0046685	1	29	0.0172057	0.0320987	http://amigo.geneontology.org/cgi-bin/amigo/term_details?term=GO:0046685
positive regulation of morphogenesis of an epithelium	Gene Ontology	GO:1905332	1	29	0.0172057	0.0320987	http://amigo.geneontology.org/cgi-bin/amigo/term_details?term=GO:1905332
positive regulation of cardiac muscle tissue development	Gene Ontology	GO:0055025	1	29	0.0172057	0.0320987	http://amigo.geneontology.org/cgi-bin/amigo/term_details?term=GO:0055025
regulation of extracellular matrix organization	Gene Ontology	GO:1903053	1	29	0.0172057	0.0320987	http://amigo.geneontology.org/cgi-bin/amigo/term_details?term=GO:1903053
sulfur compound metabolic process	Gene Ontology	GO:0006790	2	351	0.0175647	0.0326927	http://amigo.geneontology.org/cgi-bin/amigo/term_details?term=GO:0006790
negative regulation of transferase activity	Gene Ontology	GO:0051348	2	351	0.0175647	0.0326927	http://amigo.geneontology.org/cgi-bin/amigo/term_details?term=GO:0051348
blood coagulation	Gene Ontology	GO:0007596	2	353	0.0177522	0.0327797	http://amigo.geneontology.org/cgi-bin/amigo/term_details?term=GO:0007596
positive regulation of proteolysis	Gene Ontology	GO:0045862	2	353	0.0177522	0.0327797	http://amigo.geneontology.org/cgi-bin/amigo/term_details?term=GO:0045862
negative regulation of muscle cell apoptotic process	Gene Ontology	GO:0010656	1	30	0.0177743	0.0327797	http://amigo.geneontology.org/cgi-bin/amigo/term_details?term=GO:0010656
positive regulation of smooth muscle cell migration	Gene Ontology	GO:0014911	1	30	0.0177743	0.0327797	http://amigo.geneontology.org/cgi-bin/amigo/term_details?term=GO:0014911
protein complex involved in cell adhesion	Gene Ontology	GO:0098636	1	30	0.0177743	0.0327797	http://amigo.geneontology.org/cgi-bin/amigo/term_details?term=GO:0098636
negative regulation of cell-matrix adhesion	Gene Ontology	GO:0001953	1	30	0.0177743	0.0327797	http://amigo.geneontology.org/cgi-bin/amigo/term_details?term=GO:0001953
integrin complex	Gene Ontology	GO:0008305	1	30	0.0177743	0.0327797	http://amigo.geneontology.org/cgi-bin/amigo/term_details?term=GO:0008305
chondroitin sulfate proteoglycan biosynthetic process	Gene Ontology	GO:0050650	1	30	0.0177743	0.0327797	http://amigo.geneontology.org/cgi-bin/amigo/term_details?term=GO:0050650
peptidyl-tyrosine phosphorylation	Gene Ontology	GO:0018108	2	358	0.0182247	0.0334446	http://amigo.geneontology.org/cgi-bin/amigo/term_details?term=GO:0018108
hemostasis	Gene Ontology	GO:0007599	2	358	0.0182247	0.0334446	http://amigo.geneontology.org/cgi-bin/amigo/term_details?term=GO:0007599
coagulation	Gene Ontology	GO:0050817	2	358	0.0182247	0.0334446	http://amigo.geneontology.org/cgi-bin/amigo/term_details?term=GO:0050817
apoptotic process	Gene Ontology	GO:0006915	4	1786	0.0182396	0.0334446	http://amigo.geneontology.org/cgi-bin/amigo/term_details?term=GO:0006915
organic substance catabolic process	Gene Ontology	GO:1901575	4	1789	0.0183411	0.0334446	http://amigo.geneontology.org/cgi-bin/amigo/term_details?term=GO:1901575
stem cell division	Gene Ontology	GO:0017145	1	31	0.0183426	0.0334446	http://amigo.geneontology.org/cgi-bin/amigo/term_details?term=GO:0017145
face morphogenesis	Gene Ontology	GO:0060325	1	31	0.0183426	0.0334446	http://amigo.geneontology.org/cgi-bin/amigo/term_details?term=GO:0060325
Wnt-protein binding	Gene Ontology	GO:0017147	1	31	0.0183426	0.0334446	http://amigo.geneontology.org/cgi-bin/amigo/term_details?term=GO:0017147
response to epidermal growth factor	Gene Ontology	GO:0070849	1	31	0.0183426	0.0334446	http://amigo.geneontology.org/cgi-bin/amigo/term_details?term=GO:0070849
response to ischemia	Gene Ontology	GO:0002931	1	31	0.0183426	0.0334446	http://amigo.geneontology.org/cgi-bin/amigo/term_details?term=GO:0002931
apical part of cell	Gene Ontology	GO:0045177	2	360	0.0184152	0.0335011	http://amigo.geneontology.org/cgi-bin/amigo/term_details?term=GO:0045177
peptidyl-tyrosine modification	Gene Ontology	GO:0018212	2	360	0.0184152	0.0335011	http://amigo.geneontology.org/cgi-bin/amigo/term_details?term=GO:0018212
regulation of endopeptidase activity	Gene Ontology	GO:0052548	2	365	0.0188952	0.0340942	http://amigo.geneontology.org/cgi-bin/amigo/term_details?term=GO:0052548
proximal/distal pattern formation	Gene Ontology	GO:0009954	1	32	0.0189106	0.0340942	http://amigo.geneontology.org/cgi-bin/amigo/term_details?term=GO:0009954
axis elongation	Gene Ontology	GO:0003401	1	32	0.0189106	0.0340942	http://amigo.geneontology.org/cgi-bin/amigo/term_details?term=GO:0003401
patterning of blood vessels	Gene Ontology	GO:0001569	1	32	0.0189106	0.0340942	http://amigo.geneontology.org/cgi-bin/amigo/term_details?term=GO:0001569
keratan sulfate metabolic process	Gene Ontology	GO:0042339	1	32	0.0189106	0.0340942	http://amigo.geneontology.org/cgi-bin/amigo/term_details?term=GO:0042339
response to X-ray	Gene Ontology	GO:0010165	1	32	0.0189106	0.0340942	http://amigo.geneontology.org/cgi-bin/amigo/term_details?term=GO:0010165
mesodermal cell differentiation	Gene Ontology	GO:0048333	1	32	0.0189106	0.0340942	http://amigo.geneontology.org/cgi-bin/amigo/term_details?term=GO:0048333
negative regulation of JNK cascade	Gene Ontology	GO:0046329	1	32	0.0189106	0.0340942	http://amigo.geneontology.org/cgi-bin/amigo/term_details?term=GO:0046329
programmed cell death	Gene Ontology	GO:0012501	4	1808	0.0189925	0.0342035	http://amigo.geneontology.org/cgi-bin/amigo/term_details?term=GO:0012501
nucleic acid metabolic process	Gene Ontology	GO:0090304	7	4975	0.0190552	0.034278	http://amigo.geneontology.org/cgi-bin/amigo/term_details?term=GO:0090304
enzyme inhibitor activity	Gene Ontology	GO:0004857	2	368	0.0191857	0.0344743	http://amigo.geneontology.org/cgi-bin/amigo/term_details?term=GO:0004857
response to dexamethasone	Gene Ontology	GO:0071548	1	33	0.0194783	0.0348058	http://amigo.geneontology.org/cgi-bin/amigo/term_details?term=GO:0071548
cell migration involved in sprouting angiogenesis	Gene Ontology	GO:0002042	1	33	0.0194783	0.0348058	http://amigo.geneontology.org/cgi-bin/amigo/term_details?term=GO:0002042
negative regulation of leukocyte migration	Gene Ontology	GO:0002686	1	33	0.0194783	0.0348058	http://amigo.geneontology.org/cgi-bin/amigo/term_details?term=GO:0002686
type 2 immune response	Gene Ontology	GO:0042092	1	33	0.0194783	0.0348058	http://amigo.geneontology.org/cgi-bin/amigo/term_details?term=GO:0042092
metanephros morphogenesis	Gene Ontology	GO:0003338	1	33	0.0194783	0.0348058	http://amigo.geneontology.org/cgi-bin/amigo/term_details?term=GO:0003338
positive regulation of epithelial to mesenchymal transition	Gene Ontology	GO:0010718	1	34	0.0200456	0.035585	http://amigo.geneontology.org/cgi-bin/amigo/term_details?term=GO:0010718
negative regulation of extrinsic apoptotic signaling pathway via death domain receptors	Gene Ontology	GO:1902042	1	34	0.0200456	0.035585	http://amigo.geneontology.org/cgi-bin/amigo/term_details?term=GO:1902042
regulation of mesenchymal cell proliferation	Gene Ontology	GO:0010464	1	34	0.0200456	0.035585	http://amigo.geneontology.org/cgi-bin/amigo/term_details?term=GO:0010464
dopaminergic neuron differentiation	Gene Ontology	GO:0071542	1	34	0.0200456	0.035585	http://amigo.geneontology.org/cgi-bin/amigo/term_details?term=GO:0071542
regulation of intrinsic apoptotic signaling pathway in response to DNA damage	Gene Ontology	GO:1902229	1	34	0.0200456	0.035585	http://amigo.geneontology.org/cgi-bin/amigo/term_details?term=GO:1902229
intracellular protein transport	Gene Ontology	GO:0006886	3	1012	0.0200469	0.035585	http://amigo.geneontology.org/cgi-bin/amigo/term_details?term=GO:0006886
positive regulation of neurogenesis	Gene Ontology	GO:0050769	2	379	0.0202672	0.0359362	http://amigo.geneontology.org/cgi-bin/amigo/term_details?term=GO:0050769
glycoprotein metabolic process	Gene Ontology	GO:0009100	2	382	0.0205665	0.0363886	http://amigo.geneontology.org/cgi-bin/amigo/term_details?term=GO:0009100
cell fate commitment involved in formation of primary germ layer	Gene Ontology	GO:0060795	1	35	0.0206127	0.0363886	http://amigo.geneontology.org/cgi-bin/amigo/term_details?term=GO:0060795
brain morphogenesis	Gene Ontology	GO:0048854	1	35	0.0206127	0.0363886	http://amigo.geneontology.org/cgi-bin/amigo/term_details?term=GO:0048854
response to prostaglandin	Gene Ontology	GO:0034694	1	35	0.0206127	0.0363886	http://amigo.geneontology.org/cgi-bin/amigo/term_details?term=GO:0034694
positive regulation of cytokine production	Gene Ontology	GO:0001819	2	383	0.0206667	0.036444	http://amigo.geneontology.org/cgi-bin/amigo/term_details?term=GO:0001819
regulation of protein secretion	Gene Ontology	GO:0050708	2	385	0.0208677	0.0367582	http://amigo.geneontology.org/cgi-bin/amigo/term_details?term=GO:0050708
exocytosis	Gene Ontology	GO:0006887	2	386	0.0209685	0.0368954	http://amigo.geneontology.org/cgi-bin/amigo/term_details?term=GO:0006887
response to oxidative stress	Gene Ontology	GO:0006979	2	387	0.0210695	0.0370237	http://amigo.geneontology.org/cgi-bin/amigo/term_details?term=GO:0006979
focal adhesion	Gene Ontology	GO:0005925	2	388	0.0211708	0.0370237	http://amigo.geneontology.org/cgi-bin/amigo/term_details?term=GO:0005925
T cell migration	Gene Ontology	GO:0072678	1	36	0.0211794	0.0370237	http://amigo.geneontology.org/cgi-bin/amigo/term_details?term=GO:0072678
head morphogenesis	Gene Ontology	GO:0060323	1	36	0.0211794	0.0370237	http://amigo.geneontology.org/cgi-bin/amigo/term_details?term=GO:0060323
positive regulation of axon extension	Gene Ontology	GO:0045773	1	36	0.0211794	0.0370237	http://amigo.geneontology.org/cgi-bin/amigo/term_details?term=GO:0045773
RNA polymerase II transcription coactivator activity	Gene Ontology	GO:0001105	1	36	0.0211794	0.0370237	http://amigo.geneontology.org/cgi-bin/amigo/term_details?term=GO:0001105
cell-substrate adherens junction	Gene Ontology	GO:0005924	2	391	0.0214757	0.0375009	http://amigo.geneontology.org/cgi-bin/amigo/term_details?term=GO:0005924
epithelium development	Gene Ontology	GO:0060429	3	1042	0.021635	0.0377383	http://amigo.geneontology.org/cgi-bin/amigo/term_details?term=GO:0060429
regulation of collagen metabolic process	Gene Ontology	GO:0010712	1	37	0.0217458	0.0378495	http://amigo.geneontology.org/cgi-bin/amigo/term_details?term=GO:0010712
regulation of receptor internalization	Gene Ontology	GO:0002090	1	37	0.0217458	0.0378495	http://amigo.geneontology.org/cgi-bin/amigo/term_details?term=GO:0002090
cell-substrate junction	Gene Ontology	GO:0030055	2	395	0.0218851	0.0380508	http://amigo.geneontology.org/cgi-bin/amigo/term_details?term=GO:0030055
myoblast fusion	Gene Ontology	GO:0007520	1	38	0.0223119	0.0386676	http://amigo.geneontology.org/cgi-bin/amigo/term_details?term=GO:0007520
regulation of protein autophosphorylation	Gene Ontology	GO:0031952	1	38	0.0223119	0.0386676	http://amigo.geneontology.org/cgi-bin/amigo/term_details?term=GO:0031952
regulation of multicellular organismal metabolic process	Gene Ontology	GO:0044246	1	38	0.0223119	0.0386676	http://amigo.geneontology.org/cgi-bin/amigo/term_details?term=GO:0044246
ventricular cardiac muscle tissue morphogenesis	Gene Ontology	GO:0055010	1	39	0.0228777	0.0393937	http://amigo.geneontology.org/cgi-bin/amigo/term_details?term=GO:0055010
positive regulation of protein tyrosine kinase activity	Gene Ontology	GO:0061098	1	39	0.0228777	0.0393937	http://amigo.geneontology.org/cgi-bin/amigo/term_details?term=GO:0061098
regulation of cell adhesion mediated by integrin	Gene Ontology	GO:0033628	1	39	0.0228777	0.0393937	http://amigo.geneontology.org/cgi-bin/amigo/term_details?term=GO:0033628
negative regulation of endothelial cell migration	Gene Ontology	GO:0010596	1	39	0.0228777	0.0393937	http://amigo.geneontology.org/cgi-bin/amigo/term_details?term=GO:0010596
regulation of lymphocyte migration	Gene Ontology	GO:2000401	1	39	0.0228777	0.0393937	http://amigo.geneontology.org/cgi-bin/amigo/term_details?term=GO:2000401
negative regulation of peptidyl-tyrosine phosphorylation	Gene Ontology	GO:0050732	1	39	0.0228777	0.0393937	http://amigo.geneontology.org/cgi-bin/amigo/term_details?term=GO:0050732
secretion	Gene Ontology	GO:0046903	3	1066	0.0229545	0.0394838	http://amigo.geneontology.org/cgi-bin/amigo/term_details?term=GO:0046903
embryonic organ development	Gene Ontology	GO:0048568	2	409	0.0233438	0.040025	http://amigo.geneontology.org/cgi-bin/amigo/term_details?term=GO:0048568
protein trimerization	Gene Ontology	GO:0070206	1	40	0.0234432	0.040025	http://amigo.geneontology.org/cgi-bin/amigo/term_details?term=GO:0070206
negative regulation of stress-activated protein kinase signaling cascade	Gene Ontology	GO:0070303	1	40	0.0234432	0.040025	http://amigo.geneontology.org/cgi-bin/amigo/term_details?term=GO:0070303
aminopeptidase activity	Gene Ontology	GO:0004177	1	40	0.0234432	0.040025	http://amigo.geneontology.org/cgi-bin/amigo/term_details?term=GO:0004177
cellular response to vascular endothelial growth factor stimulus	Gene Ontology	GO:0035924	1	40	0.0234432	0.040025	http://amigo.geneontology.org/cgi-bin/amigo/term_details?term=GO:0035924
negative regulation of stress-activated MAPK cascade	Gene Ontology	GO:0032873	1	40	0.0234432	0.040025	http://amigo.geneontology.org/cgi-bin/amigo/term_details?term=GO:0032873
negative regulation of cytokine-mediated signaling pathway	Gene Ontology	GO:0001960	1	40	0.0234432	0.040025	http://amigo.geneontology.org/cgi-bin/amigo/term_details?term=GO:0001960
single-organism cellular localization	Gene Ontology	GO:1902580	3	1077	0.0235739	0.0402055	http://amigo.geneontology.org/cgi-bin/amigo/term_details?term=GO:1902580
regulation of telomerase activity	Gene Ontology	GO:0051972	1	41	0.0240084	0.0407737	http://amigo.geneontology.org/cgi-bin/amigo/term_details?term=GO:0051972
metanephric nephron development	Gene Ontology	GO:0072210	1	41	0.0240084	0.0407737	http://amigo.geneontology.org/cgi-bin/amigo/term_details?term=GO:0072210
chondroitin sulfate metabolic process	Gene Ontology	GO:0030204	1	41	0.0240084	0.0407737	http://amigo.geneontology.org/cgi-bin/amigo/term_details?term=GO:0030204
positive regulation of kidney development	Gene Ontology	GO:0090184	1	41	0.0240084	0.0407737	http://amigo.geneontology.org/cgi-bin/amigo/term_details?term=GO:0090184
reproductive structure development	Gene Ontology	GO:0048608	2	419	0.0244099	0.0414119	http://amigo.geneontology.org/cgi-bin/amigo/term_details?term=GO:0048608
mesenchymal cell proliferation	Gene Ontology	GO:0010463	1	42	0.0245732	0.0416452	http://amigo.geneontology.org/cgi-bin/amigo/term_details?term=GO:0010463
reproductive system development	Gene Ontology	GO:0061458	2	424	0.0249503	0.0421581	http://amigo.geneontology.org/cgi-bin/amigo/term_details?term=GO:0061458
peptidyl-tyrosine autophosphorylation	Gene Ontology	GO:0038083	1	43	0.0251378	0.0421581	http://amigo.geneontology.org/cgi-bin/amigo/term_details?term=GO:0038083
response to pH	Gene Ontology	GO:0009268	1	43	0.0251378	0.0421581	http://amigo.geneontology.org/cgi-bin/amigo/term_details?term=GO:0009268
regulation of bone remodeling	Gene Ontology	GO:0046850	1	43	0.0251378	0.0421581	http://amigo.geneontology.org/cgi-bin/amigo/term_details?term=GO:0046850
chondroitin sulfate proteoglycan metabolic process	Gene Ontology	GO:0050654	1	43	0.0251378	0.0421581	http://amigo.geneontology.org/cgi-bin/amigo/term_details?term=GO:0050654
regulation of substrate adhesion-dependent cell spreading	Gene Ontology	GO:1900024	1	43	0.0251378	0.0421581	http://amigo.geneontology.org/cgi-bin/amigo/term_details?term=GO:1900024
detection of mechanical stimulus	Gene Ontology	GO:0050982	1	43	0.0251378	0.0421581	http://amigo.geneontology.org/cgi-bin/amigo/term_details?term=GO:0050982
regulation of mitophagy	Gene Ontology	GO:1903146	1	43	0.0251378	0.0421581	http://amigo.geneontology.org/cgi-bin/amigo/term_details?term=GO:1903146
regulation of muscle cell apoptotic process	Gene Ontology	GO:0010660	1	43	0.0251378	0.0421581	http://amigo.geneontology.org/cgi-bin/amigo/term_details?term=GO:0010660
cell fate determination	Gene Ontology	GO:0001709	1	43	0.0251378	0.0421581	http://amigo.geneontology.org/cgi-bin/amigo/term_details?term=GO:0001709
negative regulation of transcription, DNA-templated	Gene Ontology	GO:0045892	3	1111	0.0255463	0.0427986	http://amigo.geneontology.org/cgi-bin/amigo/term_details?term=GO:0045892
negative regulation of JAK-STAT cascade	Gene Ontology	GO:0046426	1	44	0.025702	0.0428811	http://amigo.geneontology.org/cgi-bin/amigo/term_details?term=GO:0046426
negative regulation of STAT cascade	Gene Ontology	GO:1904893	1	44	0.025702	0.0428811	http://amigo.geneontology.org/cgi-bin/amigo/term_details?term=GO:1904893
negative regulation of cytokine secretion	Gene Ontology	GO:0050710	1	44	0.025702	0.0428811	http://amigo.geneontology.org/cgi-bin/amigo/term_details?term=GO:0050710
negative regulation of response to cytokine stimulus	Gene Ontology	GO:0060761	1	44	0.025702	0.0428811	http://amigo.geneontology.org/cgi-bin/amigo/term_details?term=GO:0060761
response to drug	Gene Ontology	GO:0042493	2	434	0.0260461	0.0434101	http://amigo.geneontology.org/cgi-bin/amigo/term_details?term=GO:0042493
pattern specification process	Gene Ontology	GO:0007389	2	435	0.0261567	0.0435495	http://amigo.geneontology.org/cgi-bin/amigo/term_details?term=GO:0007389
positive regulation of receptor-mediated endocytosis	Gene Ontology	GO:0048260	1	45	0.0262659	0.0435511	http://amigo.geneontology.org/cgi-bin/amigo/term_details?term=GO:0048260
ventricular cardiac muscle tissue development	Gene Ontology	GO:0003229	1	45	0.0262659	0.0435511	http://amigo.geneontology.org/cgi-bin/amigo/term_details?term=GO:0003229
endochondral bone morphogenesis	Gene Ontology	GO:0060350	1	45	0.0262659	0.0435511	http://amigo.geneontology.org/cgi-bin/amigo/term_details?term=GO:0060350
positive regulation of receptor activity	Gene Ontology	GO:2000273	1	45	0.0262659	0.0435511	http://amigo.geneontology.org/cgi-bin/amigo/term_details?term=GO:2000273
phosphate-containing compound metabolic process	Gene Ontology	GO:0006796	5	3008	0.0264509	0.0438127	http://amigo.geneontology.org/cgi-bin/amigo/term_details?term=GO:0006796
phosphorus metabolic process	Gene Ontology	GO:0006793	5	3016	0.0267213	0.0442151	http://amigo.geneontology.org/cgi-bin/amigo/term_details?term=GO:0006793
embryonic cranial skeleton morphogenesis	Gene Ontology	GO:0048701	1	46	0.0268295	0.0442577	http://amigo.geneontology.org/cgi-bin/amigo/term_details?term=GO:0048701
epithelial cell morphogenesis	Gene Ontology	GO:0003382	1	46	0.0268295	0.0442577	http://amigo.geneontology.org/cgi-bin/amigo/term_details?term=GO:0003382
regulation of chondrocyte differentiation	Gene Ontology	GO:0032330	1	46	0.0268295	0.0442577	http://amigo.geneontology.org/cgi-bin/amigo/term_details?term=GO:0032330
negative regulation of intracellular signal transduction	Gene Ontology	GO:1902532	2	444	0.0271613	0.0447592	http://amigo.geneontology.org/cgi-bin/amigo/term_details?term=GO:1902532
syncytium formation by plasma membrane fusion	Gene Ontology	GO:0000768	1	47	0.0273928	0.0449566	http://amigo.geneontology.org/cgi-bin/amigo/term_details?term=GO:0000768
prostate gland development	Gene Ontology	GO:0030850	1	47	0.0273928	0.0449566	http://amigo.geneontology.org/cgi-bin/amigo/term_details?term=GO:0030850
regulation of cardiac muscle tissue development	Gene Ontology	GO:0055024	1	47	0.0273928	0.0449566	http://amigo.geneontology.org/cgi-bin/amigo/term_details?term=GO:0055024
morphogenesis of an epithelial sheet	Gene Ontology	GO:0002011	1	47	0.0273928	0.0449566	http://amigo.geneontology.org/cgi-bin/amigo/term_details?term=GO:0002011
regulation of establishment of protein localization to plasma membrane	Gene Ontology	GO:0090003	1	48	0.0279558	0.0455555	http://amigo.geneontology.org/cgi-bin/amigo/term_details?term=GO:0090003
body morphogenesis	Gene Ontology	GO:0010171	1	48	0.0279558	0.0455555	http://amigo.geneontology.org/cgi-bin/amigo/term_details?term=GO:0010171
regulation of focal adhesion assembly	Gene Ontology	GO:0051893	1	48	0.0279558	0.0455555	http://amigo.geneontology.org/cgi-bin/amigo/term_details?term=GO:0051893
NF-kappaB import into nucleus	Gene Ontology	GO:0042348	1	48	0.0279558	0.0455555	http://amigo.geneontology.org/cgi-bin/amigo/term_details?term=GO:0042348
regulation of cell-substrate junction assembly	Gene Ontology	GO:0090109	1	48	0.0279558	0.0455555	http://amigo.geneontology.org/cgi-bin/amigo/term_details?term=GO:0090109
regulation of NF-kappaB import into nucleus	Gene Ontology	GO:0042345	1	48	0.0279558	0.0455555	http://amigo.geneontology.org/cgi-bin/amigo/term_details?term=GO:0042345
anatomical structure maturation	Gene Ontology	GO:0071695	1	48	0.0279558	0.0455555	http://amigo.geneontology.org/cgi-bin/amigo/term_details?term=GO:0071695
negative regulation of nucleic acid-templated transcription	Gene Ontology	GO:1903507	3	1153	0.0281038	0.0457504	http://amigo.geneontology.org/cgi-bin/amigo/term_details?term=GO:1903507
muscle cell apoptotic process	Gene Ontology	GO:0010657	1	49	0.0285185	0.046285	http://amigo.geneontology.org/cgi-bin/amigo/term_details?term=GO:0010657
regulation of smooth muscle cell migration	Gene Ontology	GO:0014910	1	49	0.0285185	0.046285	http://amigo.geneontology.org/cgi-bin/amigo/term_details?term=GO:0014910
digestive tract morphogenesis	Gene Ontology	GO:0048546	1	49	0.0285185	0.046285	http://amigo.geneontology.org/cgi-bin/amigo/term_details?term=GO:0048546
nucleocytoplasmic transport	Gene Ontology	GO:0006913	2	457	0.0286398	0.0464352	http://amigo.geneontology.org/cgi-bin/amigo/term_details?term=GO:0006913
nitrogen compound metabolic process	Gene Ontology	GO:0006807	8	6685	0.0289662	0.0468201	http://amigo.geneontology.org/cgi-bin/amigo/term_details?term=GO:0006807
regulation of adherens junction organization	Gene Ontology	GO:1903391	1	50	0.0290808	0.0468201	http://amigo.geneontology.org/cgi-bin/amigo/term_details?term=GO:1903391
face development	Gene Ontology	GO:0060324	1	50	0.0290808	0.0468201	http://amigo.geneontology.org/cgi-bin/amigo/term_details?term=GO:0060324
negative regulation of blood coagulation	Gene Ontology	GO:0030195	1	50	0.0290808	0.0468201	http://amigo.geneontology.org/cgi-bin/amigo/term_details?term=GO:0030195
neuron projection regeneration	Gene Ontology	GO:0031102	1	50	0.0290808	0.0468201	http://amigo.geneontology.org/cgi-bin/amigo/term_details?term=GO:0031102
positive regulation of chemokine production	Gene Ontology	GO:0032722	1	50	0.0290808	0.0468201	http://amigo.geneontology.org/cgi-bin/amigo/term_details?term=GO:0032722
negative regulation of hemostasis	Gene Ontology	GO:1900047	1	50	0.0290808	0.0468201	http://amigo.geneontology.org/cgi-bin/amigo/term_details?term=GO:1900047
vacuole	Gene Ontology	GO:0005773	3	1169	0.0291133	0.0468256	http://amigo.geneontology.org/cgi-bin/amigo/term_details?term=GO:0005773
negative regulation of RNA biosynthetic process	Gene Ontology	GO:1902679	3	1170	0.0291771	0.0468813	http://amigo.geneontology.org/cgi-bin/amigo/term_details?term=GO:1902679
nuclear transport	Gene Ontology	GO:0051169	2	465	0.0295656	0.0473462	http://amigo.geneontology.org/cgi-bin/amigo/term_details?term=GO:0051169
basal part of cell	Gene Ontology	GO:0045178	1	51	0.0296429	0.0473462	http://amigo.geneontology.org/cgi-bin/amigo/term_details?term=GO:0045178
positive regulation of transcription factor import into nucleus	Gene Ontology	GO:0042993	1	51	0.0296429	0.0473462	http://amigo.geneontology.org/cgi-bin/amigo/term_details?term=GO:0042993
artery morphogenesis	Gene Ontology	GO:0048844	1	51	0.0296429	0.0473462	http://amigo.geneontology.org/cgi-bin/amigo/term_details?term=GO:0048844
negative regulation of chemotaxis	Gene Ontology	GO:0050922	1	51	0.0296429	0.0473462	http://amigo.geneontology.org/cgi-bin/amigo/term_details?term=GO:0050922
positive regulation of fat cell differentiation	Gene Ontology	GO:0045600	1	51	0.0296429	0.0473462	http://amigo.geneontology.org/cgi-bin/amigo/term_details?term=GO:0045600
adherens junction	Gene Ontology	GO:0005912	2	466	0.0296822	0.0473621	http://amigo.geneontology.org/cgi-bin/amigo/term_details?term=GO:0005912
protein secretion	Gene Ontology	GO:0009306	2	469	0.030033	0.0478745	http://amigo.geneontology.org/cgi-bin/amigo/term_details?term=GO:0009306
negative regulation of response to DNA damage stimulus	Gene Ontology	GO:2001021	1	52	0.0302046	0.047958	http://amigo.geneontology.org/cgi-bin/amigo/term_details?term=GO:2001021
positive regulation of striated muscle cell differentiation	Gene Ontology	GO:0051155	1	52	0.0302046	0.047958	http://amigo.geneontology.org/cgi-bin/amigo/term_details?term=GO:0051155
syncytium formation	Gene Ontology	GO:0006949	1	52	0.0302046	0.047958	http://amigo.geneontology.org/cgi-bin/amigo/term_details?term=GO:0006949
bone resorption	Gene Ontology	GO:0045453	1	52	0.0302046	0.047958	http://amigo.geneontology.org/cgi-bin/amigo/term_details?term=GO:0045453
transcriptional activator activity, RNA polymerase II transcription factor binding	Gene Ontology	GO:0001190	1	53	0.030766	0.0485145	http://amigo.geneontology.org/cgi-bin/amigo/term_details?term=GO:0001190
transcriptional repressor activity, RNA polymerase II activating transcription factor binding	Gene Ontology	GO:0098811	1	53	0.030766	0.0485145	http://amigo.geneontology.org/cgi-bin/amigo/term_details?term=GO:0098811
negative regulation of reproductive process	Gene Ontology	GO:2000242	1	53	0.030766	0.0485145	http://amigo.geneontology.org/cgi-bin/amigo/term_details?term=GO:2000242
negative regulation of epithelial cell migration	Gene Ontology	GO:0010633	1	53	0.030766	0.0485145	http://amigo.geneontology.org/cgi-bin/amigo/term_details?term=GO:0010633
negative regulation of coagulation	Gene Ontology	GO:0050819	1	53	0.030766	0.0485145	http://amigo.geneontology.org/cgi-bin/amigo/term_details?term=GO:0050819
regulation of morphogenesis of a branching structure	Gene Ontology	GO:0060688	1	53	0.030766	0.0485145	http://amigo.geneontology.org/cgi-bin/amigo/term_details?term=GO:0060688
cellular response to ionizing radiation	Gene Ontology	GO:0071479	1	53	0.030766	0.0485145	http://amigo.geneontology.org/cgi-bin/amigo/term_details?term=GO:0071479
cellular response to organonitrogen compound	Gene Ontology	GO:0071417	2	477	0.0309768	0.0487991	http://amigo.geneontology.org/cgi-bin/amigo/term_details?term=GO:0071417
cardiac muscle tissue morphogenesis	Gene Ontology	GO:0055008	1	54	0.0313271	0.0492065	http://amigo.geneontology.org/cgi-bin/amigo/term_details?term=GO:0055008
neuromuscular junction	Gene Ontology	GO:0031594	1	54	0.0313271	0.0492065	http://amigo.geneontology.org/cgi-bin/amigo/term_details?term=GO:0031594
acute-phase response	Gene Ontology	GO:0006953	1	54	0.0313271	0.0492065	http://amigo.geneontology.org/cgi-bin/amigo/term_details?term=GO:0006953
identical protein binding	Gene Ontology	GO:0042802	3	1210	0.0317887	0.0496995	http://amigo.geneontology.org/cgi-bin/amigo/term_details?term=GO:0042802
positive regulation of fibroblast proliferation	Gene Ontology	GO:0048146	1	55	0.0318879	0.0496995	http://amigo.geneontology.org/cgi-bin/amigo/term_details?term=GO:0048146
positive regulation of muscle organ development	Gene Ontology	GO:0048636	1	55	0.0318879	0.0496995	http://amigo.geneontology.org/cgi-bin/amigo/term_details?term=GO:0048636
regulation of extrinsic apoptotic signaling pathway via death domain receptors	Gene Ontology	GO:1902041	1	55	0.0318879	0.0496995	http://amigo.geneontology.org/cgi-bin/amigo/term_details?term=GO:1902041
regulation of kidney development	Gene Ontology	GO:0090183	1	55	0.0318879	0.0496995	http://amigo.geneontology.org/cgi-bin/amigo/term_details?term=GO:0090183
platelet alpha granule lumen	Gene Ontology	GO:0031093	1	55	0.0318879	0.0496995	http://amigo.geneontology.org/cgi-bin/amigo/term_details?term=GO:0031093
smooth muscle cell migration	Gene Ontology	GO:0014909	1	55	0.0318879	0.0496995	http://amigo.geneontology.org/cgi-bin/amigo/term_details?term=GO:0014909
positive regulation of striated muscle tissue development	Gene Ontology	GO:0045844	1	55	0.0318879	0.0496995	http://amigo.geneontology.org/cgi-bin/amigo/term_details?term=GO:0045844
negative regulation of RNA metabolic process	Gene Ontology	GO:0051253	3	1212	0.0319225	0.0497052	http://amigo.geneontology.org/cgi-bin/amigo/term_details?term=GO:0051253
carbohydrate derivative metabolic process	Gene Ontology	GO:1901135	3	1213	0.0319895	0.0497614	http://amigo.geneontology.org/cgi-bin/amigo/term_details?term=GO:1901135
anchoring junction	Gene Ontology	GO:0070161	2	486	0.0320526	0.0498115	http://amigo.geneontology.org/cgi-bin/amigo/term_details?term=GO:0070161
peptide cross-linking	Gene Ontology	GO:0018149	1	56	0.0324484	0.050281	http://amigo.geneontology.org/cgi-bin/amigo/term_details?term=GO:0018149
positive regulation of muscle tissue development	Gene Ontology	GO:1901863	1	56	0.0324484	0.050281	http://amigo.geneontology.org/cgi-bin/amigo/term_details?term=GO:1901863
cranial skeletal system development	Gene Ontology	GO:1904888	1	56	0.0324484	0.050281	http://amigo.geneontology.org/cgi-bin/amigo/term_details?term=GO:1904888
cellular response to glucocorticoid stimulus	Gene Ontology	GO:0071385	1	57	0.0330086	0.0510998	http://amigo.geneontology.org/cgi-bin/amigo/term_details?term=GO:0071385
tissue regeneration	Gene Ontology	GO:0042246	1	58	0.0335685	0.0519166	http://amigo.geneontology.org/cgi-bin/amigo/term_details?term=GO:0042246
nucleobase-containing compound metabolic process	Gene Ontology	GO:0006139	7	5592	0.0341058	0.0525297	http://amigo.geneontology.org/cgi-bin/amigo/term_details?term=GO:0006139
positive regulation of osteoblast differentiation	Gene Ontology	GO:0045669	1	59	0.034128	0.0525297	http://amigo.geneontology.org/cgi-bin/amigo/term_details?term=GO:0045669
outflow tract morphogenesis	Gene Ontology	GO:0003151	1	59	0.034128	0.0525297	http://amigo.geneontology.org/cgi-bin/amigo/term_details?term=GO:0003151
branching involved in ureteric bud morphogenesis	Gene Ontology	GO:0001658	1	59	0.034128	0.0525297	http://amigo.geneontology.org/cgi-bin/amigo/term_details?term=GO:0001658
positive regulation of DNA biosynthetic process	Gene Ontology	GO:2000573	1	59	0.034128	0.0525297	http://amigo.geneontology.org/cgi-bin/amigo/term_details?term=GO:2000573
regulation of body fluid levels	Gene Ontology	GO:0050878	2	506	0.0344961	0.0530455	http://amigo.geneontology.org/cgi-bin/amigo/term_details?term=GO:0050878
proteoglycan biosynthetic process	Gene Ontology	GO:0030166	1	60	0.0346873	0.0531365	http://amigo.geneontology.org/cgi-bin/amigo/term_details?term=GO:0030166
protein kinase activator activity	Gene Ontology	GO:0030295	1	60	0.0346873	0.0531365	http://amigo.geneontology.org/cgi-bin/amigo/term_details?term=GO:0030295
regulation of pathway-restricted SMAD protein phosphorylation	Gene Ontology	GO:0060393	1	60	0.0346873	0.0531365	http://amigo.geneontology.org/cgi-bin/amigo/term_details?term=GO:0060393
monocyte chemotaxis	Gene Ontology	GO:0002548	1	60	0.0346873	0.0531365	http://amigo.geneontology.org/cgi-bin/amigo/term_details?term=GO:0002548
cellular response to organic cyclic compound	Gene Ontology	GO:0071407	2	512	0.0352431	0.0538391	http://amigo.geneontology.org/cgi-bin/amigo/term_details?term=GO:0071407
embryonic digit morphogenesis	Gene Ontology	GO:0042733	1	61	0.0352462	0.0538391	http://amigo.geneontology.org/cgi-bin/amigo/term_details?term=GO:0042733
cellular response to corticosteroid stimulus	Gene Ontology	GO:0071384	1	61	0.0352462	0.0538391	http://amigo.geneontology.org/cgi-bin/amigo/term_details?term=GO:0071384
positive regulation of synapse assembly	Gene Ontology	GO:0051965	1	62	0.0358048	0.0545372	http://amigo.geneontology.org/cgi-bin/amigo/term_details?term=GO:0051965
regulation of smoothened signaling pathway	Gene Ontology	GO:0008589	1	62	0.0358048	0.0545372	http://amigo.geneontology.org/cgi-bin/amigo/term_details?term=GO:0008589
negative regulation of wound healing	Gene Ontology	GO:0061045	1	62	0.0358048	0.0545372	http://amigo.geneontology.org/cgi-bin/amigo/term_details?term=GO:0061045
regulation of cartilage development	Gene Ontology	GO:0061035	1	63	0.0363632	0.0551268	http://amigo.geneontology.org/cgi-bin/amigo/term_details?term=GO:0061035
regulation of protein localization to plasma membrane	Gene Ontology	GO:1903076	1	63	0.0363632	0.0551268	http://amigo.geneontology.org/cgi-bin/amigo/term_details?term=GO:1903076
regulation of tissue remodeling	Gene Ontology	GO:0034103	1	63	0.0363632	0.0551268	http://amigo.geneontology.org/cgi-bin/amigo/term_details?term=GO:0034103
regulation of protein tyrosine kinase activity	Gene Ontology	GO:0061097	1	63	0.0363632	0.0551268	http://amigo.geneontology.org/cgi-bin/amigo/term_details?term=GO:0061097
pathway-restricted SMAD protein phosphorylation	Gene Ontology	GO:0060389	1	63	0.0363632	0.0551268	http://amigo.geneontology.org/cgi-bin/amigo/term_details?term=GO:0060389
muscle tissue morphogenesis	Gene Ontology	GO:0060415	1	64	0.0369212	0.0558151	http://amigo.geneontology.org/cgi-bin/amigo/term_details?term=GO:0060415
ureteric bud morphogenesis	Gene Ontology	GO:0060675	1	64	0.0369212	0.0558151	http://amigo.geneontology.org/cgi-bin/amigo/term_details?term=GO:0060675
regulation of protein localization to cell periphery	Gene Ontology	GO:1904375	1	64	0.0369212	0.0558151	http://amigo.geneontology.org/cgi-bin/amigo/term_details?term=GO:1904375
endomembrane system organization	Gene Ontology	GO:0010256	2	526	0.0370107	0.055898	http://amigo.geneontology.org/cgi-bin/amigo/term_details?term=GO:0010256
muscle cell migration	Gene Ontology	GO:0014812	1	65	0.0374789	0.0564462	http://amigo.geneontology.org/cgi-bin/amigo/term_details?term=GO:0014812
mesonephric tubule morphogenesis	Gene Ontology	GO:0072171	1	65	0.0374789	0.0564462	http://amigo.geneontology.org/cgi-bin/amigo/term_details?term=GO:0072171
negative regulation of leukocyte proliferation	Gene Ontology	GO:0070664	1	65	0.0374789	0.0564462	http://amigo.geneontology.org/cgi-bin/amigo/term_details?term=GO:0070664
negative regulation of cellular macromolecule biosynthetic process	Gene Ontology	GO:2000113	3	1297	0.0378859	0.0569659	http://amigo.geneontology.org/cgi-bin/amigo/term_details?term=GO:2000113
heterocycle metabolic process	Gene Ontology	GO:0046483	7	5717	0.037945	0.0569659	http://amigo.geneontology.org/cgi-bin/amigo/term_details?term=GO:0046483
chemotaxis	Gene Ontology	GO:0006935	2	534	0.0380361	0.0569659	http://amigo.geneontology.org/cgi-bin/amigo/term_details?term=GO:0006935
regulation of Notch signaling pathway	Gene Ontology	GO:0008593	1	66	0.0380363	0.0569659	http://amigo.geneontology.org/cgi-bin/amigo/term_details?term=GO:0008593
kinase activator activity	Gene Ontology	GO:0019209	1	66	0.0380363	0.0569659	http://amigo.geneontology.org/cgi-bin/amigo/term_details?term=GO:0019209
regulation of chemokine production	Gene Ontology	GO:0032642	1	66	0.0380363	0.0569659	http://amigo.geneontology.org/cgi-bin/amigo/term_details?term=GO:0032642
taxis	Gene Ontology	GO:0042330	2	535	0.038165	0.0571057	http://amigo.geneontology.org/cgi-bin/amigo/term_details?term=GO:0042330
somitogenesis	Gene Ontology	GO:0001756	1	67	0.0385933	0.0576394	http://amigo.geneontology.org/cgi-bin/amigo/term_details?term=GO:0001756
neuron fate commitment	Gene Ontology	GO:0048663	1	67	0.0385933	0.0576394	http://amigo.geneontology.org/cgi-bin/amigo/term_details?term=GO:0048663
neuron projection morphogenesis	Gene Ontology	GO:0048812	2	541	0.0389423	0.0580937	http://amigo.geneontology.org/cgi-bin/amigo/term_details?term=GO:0048812
regulation of cell junction assembly	Gene Ontology	GO:1901888	1	68	0.0391501	0.0580937	http://amigo.geneontology.org/cgi-bin/amigo/term_details?term=GO:1901888
negative regulation of response to wounding	Gene Ontology	GO:1903035	1	68	0.0391501	0.0580937	http://amigo.geneontology.org/cgi-bin/amigo/term_details?term=GO:1903035
mesoderm formation	Gene Ontology	GO:0001707	1	68	0.0391501	0.0580937	http://amigo.geneontology.org/cgi-bin/amigo/term_details?term=GO:0001707
cell-substrate adherens junction assembly	Gene Ontology	GO:0007045	1	68	0.0391501	0.0580937	http://amigo.geneontology.org/cgi-bin/amigo/term_details?term=GO:0007045
focal adhesion assembly	Gene Ontology	GO:0048041	1	68	0.0391501	0.0580937	http://amigo.geneontology.org/cgi-bin/amigo/term_details?term=GO:0048041
sprouting angiogenesis	Gene Ontology	GO:0002040	1	68	0.0391501	0.0580937	http://amigo.geneontology.org/cgi-bin/amigo/term_details?term=GO:0002040
cytokine-mediated signaling pathway	Gene Ontology	GO:0019221	2	543	0.0392028	0.0581183	http://amigo.geneontology.org/cgi-bin/amigo/term_details?term=GO:0019221
cellular aromatic compound metabolic process	Gene Ontology	GO:0006725	7	5765	0.0394953	0.0584982	http://amigo.geneontology.org/cgi-bin/amigo/term_details?term=GO:0006725
positive regulation of axonogenesis	Gene Ontology	GO:0050772	1	69	0.0397066	0.058703	http://amigo.geneontology.org/cgi-bin/amigo/term_details?term=GO:0050772
positive regulation of endothelial cell proliferation	Gene Ontology	GO:0001938	1	69	0.0397066	0.058703	http://amigo.geneontology.org/cgi-bin/amigo/term_details?term=GO:0001938
mesoderm morphogenesis	Gene Ontology	GO:0048332	1	70	0.0402627	0.0594707	http://amigo.geneontology.org/cgi-bin/amigo/term_details?term=GO:0048332
cellular response to nitrogen compound	Gene Ontology	GO:1901699	2	553	0.0405152	0.0597887	http://amigo.geneontology.org/cgi-bin/amigo/term_details?term=GO:1901699
blood vessel endothelial cell migration	Gene Ontology	GO:0043534	1	71	0.0408186	0.0600712	http://amigo.geneontology.org/cgi-bin/amigo/term_details?term=GO:0043534
muscle organ morphogenesis	Gene Ontology	GO:0048644	1	71	0.0408186	0.0600712	http://amigo.geneontology.org/cgi-bin/amigo/term_details?term=GO:0048644
response to activity	Gene Ontology	GO:0014823	1	71	0.0408186	0.0600712	http://amigo.geneontology.org/cgi-bin/amigo/term_details?term=GO:0014823
regulation of cellular response to stress	Gene Ontology	GO:0080135	2	556	0.0409122	0.060154	http://amigo.geneontology.org/cgi-bin/amigo/term_details?term=GO:0080135
SMAD binding	Gene Ontology	GO:0046332	1	72	0.0413741	0.0607223	http://amigo.geneontology.org/cgi-bin/amigo/term_details?term=GO:0046332
regulation of plasma membrane organization	Gene Ontology	GO:1903729	1	72	0.0413741	0.0607223	http://amigo.geneontology.org/cgi-bin/amigo/term_details?term=GO:1903729
negative regulation of nucleobase-containing compound metabolic process	Gene Ontology	GO:0045934	3	1348	0.0417238	0.0611796	http://amigo.geneontology.org/cgi-bin/amigo/term_details?term=GO:0045934
nephron tubule morphogenesis	Gene Ontology	GO:0072078	1	73	0.0419294	0.0613136	http://amigo.geneontology.org/cgi-bin/amigo/term_details?term=GO:0072078
negative regulation of MAP kinase activity	Gene Ontology	GO:0043407	1	73	0.0419294	0.0613136	http://amigo.geneontology.org/cgi-bin/amigo/term_details?term=GO:0043407
chemokine production	Gene Ontology	GO:0032602	1	73	0.0419294	0.0613136	http://amigo.geneontology.org/cgi-bin/amigo/term_details?term=GO:0032602
regulation of receptor-mediated endocytosis	Gene Ontology	GO:0048259	1	74	0.0424843	0.0620575	http://amigo.geneontology.org/cgi-bin/amigo/term_details?term=GO:0048259
positive regulation of apoptotic process	Gene Ontology	GO:0043065	2	568	0.0425152	0.0620575	http://amigo.geneontology.org/cgi-bin/amigo/term_details?term=GO:0043065
artery development	Gene Ontology	GO:0060840	1	75	0.0430389	0.0626053	http://amigo.geneontology.org/cgi-bin/amigo/term_details?term=GO:0060840
nephron epithelium morphogenesis	Gene Ontology	GO:0072088	1	75	0.0430389	0.0626053	http://amigo.geneontology.org/cgi-bin/amigo/term_details?term=GO:0072088
protein complex biogenesis	Gene Ontology	GO:0070271	3	1365	0.043046	0.0626053	http://amigo.geneontology.org/cgi-bin/amigo/term_details?term=GO:0070271
protein complex assembly	Gene Ontology	GO:0006461	3	1365	0.043046	0.0626053	http://amigo.geneontology.org/cgi-bin/amigo/term_details?term=GO:0006461
positive regulation of programmed cell death	Gene Ontology	GO:0043068	2	573	0.0431901	0.0627582	http://amigo.geneontology.org/cgi-bin/amigo/term_details?term=GO:0043068
tube development	Gene Ontology	GO:0035295	2	575	0.0434612	0.0630951	http://amigo.geneontology.org/cgi-bin/amigo/term_details?term=GO:0035295
execution phase of apoptosis	Gene Ontology	GO:0097194	1	76	0.0435932	0.0632298	http://amigo.geneontology.org/cgi-bin/amigo/term_details?term=GO:0097194
renal tubule morphogenesis	Gene Ontology	GO:0061333	1	77	0.0441472	0.0639182	http://amigo.geneontology.org/cgi-bin/amigo/term_details?term=GO:0061333
nephron morphogenesis	Gene Ontology	GO:0072028	1	77	0.0441472	0.0639182	http://amigo.geneontology.org/cgi-bin/amigo/term_details?term=GO:0072028
vesicle-mediated transport	Gene Ontology	GO:0016192	3	1382	0.0443895	0.0642113	http://amigo.geneontology.org/cgi-bin/amigo/term_details?term=GO:0016192
lymphocyte migration	Gene Ontology	GO:0072676	1	78	0.0447009	0.0645458	http://amigo.geneontology.org/cgi-bin/amigo/term_details?term=GO:0072676
adherens junction assembly	Gene Ontology	GO:0034333	1	78	0.0447009	0.0645458	http://amigo.geneontology.org/cgi-bin/amigo/term_details?term=GO:0034333
negative regulation of macromolecule biosynthetic process	Gene Ontology	GO:0010558	3	1389	0.044949	0.0648457	http://amigo.geneontology.org/cgi-bin/amigo/term_details?term=GO:0010558
organic cyclic compound metabolic process	Gene Ontology	GO:1901360	7	5932	0.045227	0.0651695	http://amigo.geneontology.org/cgi-bin/amigo/term_details?term=GO:1901360
ruffle membrane	Gene Ontology	GO:0032587	1	79	0.0452543	0.0651695	http://amigo.geneontology.org/cgi-bin/amigo/term_details?term=GO:0032587
positive regulation of cellular protein metabolic process	Gene Ontology	GO:0032270	3	1398	0.0456735	0.0657144	http://amigo.geneontology.org/cgi-bin/amigo/term_details?term=GO:0032270
regulation of synapse assembly	Gene Ontology	GO:0051963	1	80	0.0458074	0.0657308	http://amigo.geneontology.org/cgi-bin/amigo/term_details?term=GO:0051963
cellular response to mechanical stimulus	Gene Ontology	GO:0071260	1	80	0.0458074	0.0657308	http://amigo.geneontology.org/cgi-bin/amigo/term_details?term=GO:0071260
myoblast differentiation	Gene Ontology	GO:0045445	1	80	0.0458074	0.0657308	http://amigo.geneontology.org/cgi-bin/amigo/term_details?term=GO:0045445
regulation of JUN kinase activity	Gene Ontology	GO:0043506	1	81	0.0463602	0.0663466	http://amigo.geneontology.org/cgi-bin/amigo/term_details?term=GO:0043506
cysteine-type endopeptidase activity	Gene Ontology	GO:0004197	1	81	0.0463602	0.0663466	http://amigo.geneontology.org/cgi-bin/amigo/term_details?term=GO:0004197
cell fate specification	Gene Ontology	GO:0001708	1	81	0.0463602	0.0663466	http://amigo.geneontology.org/cgi-bin/amigo/term_details?term=GO:0001708
receptor internalization	Gene Ontology	GO:0031623	1	82	0.0469127	0.0670181	http://amigo.geneontology.org/cgi-bin/amigo/term_details?term=GO:0031623
neural tube closure	Gene Ontology	GO:0001843	1	82	0.0469127	0.0670181	http://amigo.geneontology.org/cgi-bin/amigo/term_details?term=GO:0001843
cytoplasmic vesicle part	Gene Ontology	GO:0044433	2	604	0.0474645	0.0675074	http://amigo.geneontology.org/cgi-bin/amigo/term_details?term=GO:0044433
negative regulation of developmental growth	Gene Ontology	GO:0048640	1	83	0.0474648	0.0675074	http://amigo.geneontology.org/cgi-bin/amigo/term_details?term=GO:0048640
tube closure	Gene Ontology	GO:0060606	1	83	0.0474648	0.0675074	http://amigo.geneontology.org/cgi-bin/amigo/term_details?term=GO:0060606
positive regulation of ossification	Gene Ontology	GO:0045778	1	83	0.0474648	0.0675074	http://amigo.geneontology.org/cgi-bin/amigo/term_details?term=GO:0045778
regulation of striated muscle cell differentiation	Gene Ontology	GO:0051153	1	83	0.0474648	0.0675074	http://amigo.geneontology.org/cgi-bin/amigo/term_details?term=GO:0051153
positive regulation of cell death	Gene Ontology	GO:0010942	2	607	0.0478862	0.0679322	http://amigo.geneontology.org/cgi-bin/amigo/term_details?term=GO:0010942
cellular response to hormone stimulus	Gene Ontology	GO:0032870	2	607	0.0478862	0.0679322	http://amigo.geneontology.org/cgi-bin/amigo/term_details?term=GO:0032870
positive regulation of cell cycle arrest	Gene Ontology	GO:0071158	1	84	0.0480167	0.0679322	http://amigo.geneontology.org/cgi-bin/amigo/term_details?term=GO:0071158
regulation of systemic arterial blood pressure	Gene Ontology	GO:0003073	1	84	0.0480167	0.0679322	http://amigo.geneontology.org/cgi-bin/amigo/term_details?term=GO:0003073
positive regulation of muscle cell differentiation	Gene Ontology	GO:0051149	1	84	0.0480167	0.0679322	http://amigo.geneontology.org/cgi-bin/amigo/term_details?term=GO:0051149
regulation of fibroblast proliferation	Gene Ontology	GO:0048145	1	84	0.0480167	0.0679322	http://amigo.geneontology.org/cgi-bin/amigo/term_details?term=GO:0048145
palate development	Gene Ontology	GO:0060021	1	85	0.0485683	0.0684719	http://amigo.geneontology.org/cgi-bin/amigo/term_details?term=GO:0060021
somite development	Gene Ontology	GO:0061053	1	85	0.0485683	0.0684719	http://amigo.geneontology.org/cgi-bin/amigo/term_details?term=GO:0061053
extrinsic apoptotic signaling pathway via death domain receptors	Gene Ontology	GO:0008625	1	85	0.0485683	0.0684719	http://amigo.geneontology.org/cgi-bin/amigo/term_details?term=GO:0008625
negative regulation of cysteine-type endopeptidase activity involved in apoptotic process	Gene Ontology	GO:0043154	1	85	0.0485683	0.0684719	http://amigo.geneontology.org/cgi-bin/amigo/term_details?term=GO:0043154
proteolysis involved in cellular protein catabolic process	Gene Ontology	GO:0051603	2	613	0.0487339	0.0686453	http://amigo.geneontology.org/cgi-bin/amigo/term_details?term=GO:0051603
regulation of secretion by cell	Gene Ontology	GO:1903530	2	614	0.0488757	0.0687673	http://amigo.geneontology.org/cgi-bin/amigo/term_details?term=GO:1903530
regulation of blood coagulation	Gene Ontology	GO:0030193	1	86	0.0491195	0.0687673	http://amigo.geneontology.org/cgi-bin/amigo/term_details?term=GO:0030193
transcriptional repressor activity, RNA polymerase II transcription factor binding	Gene Ontology	GO:0001191	1	86	0.0491195	0.0687673	http://amigo.geneontology.org/cgi-bin/amigo/term_details?term=GO:0001191
fibroblast proliferation	Gene Ontology	GO:0048144	1	86	0.0491195	0.0687673	http://amigo.geneontology.org/cgi-bin/amigo/term_details?term=GO:0048144
primary neural tube formation	Gene Ontology	GO:0014020	1	86	0.0491195	0.0687673	http://amigo.geneontology.org/cgi-bin/amigo/term_details?term=GO:0014020
regulation of hemostasis	Gene Ontology	GO:1900046	1	86	0.0491195	0.0687673	http://amigo.geneontology.org/cgi-bin/amigo/term_details?term=GO:1900046
protein kinase inhibitor activity	Gene Ontology	GO:0004860	1	86	0.0491195	0.0687673	http://amigo.geneontology.org/cgi-bin/amigo/term_details?term=GO:0004860
cardiac muscle cell differentiation	Gene Ontology	GO:0055007	1	87	0.0496704	0.0694782	http://amigo.geneontology.org/cgi-bin/amigo/term_details?term=GO:0055007
negative regulation of cellular biosynthetic process	Gene Ontology	GO:0031327	3	1450	0.0499757	0.0698238	http://amigo.geneontology.org/cgi-bin/amigo/term_details?term=GO:0031327

## Sheet: Sheet4
Supply table 4: Listing of the Genes included in the YOSHIHARA’S 141-STROMAL SIGNATURE(141 GENES).
Name	Genes
YOSHIHARA’S 141-STROMAL SIGNATURE(141 GENES)	DCN	PAPPA	SFRP4	THBS2	LY86	CXCL14	FOXF1	COL10A1	ACTG2	APBB1IP	SH2D1A	SULF1	MSR1	C3AR1	FAP	PTGIS	ITGBL1	BGN	CXCL12	ECM2	FCGR2A	MS4A4A	WISP1	COL1A2	MS4A6A	EDNRA	VCAM1	GPR124	SCUBE2	AIF1	HEPH	LUM	PTGER3	RUNX1T1	CDH5	PIK3R5	RAMP3	LDB2	COX7A1	EDIL3	DDR2	FCGR2B	LPPR4	COL15A1	AOC3	ITIH3	FMO1	PRKG1	PLXDC1
[truncated: 92 more columns]

## Sheet: Sheet5
Supply table 5: ssGSEA scores of YOSHIHARA’S 141-STROMAL SIGNATURE in GSE9891, GSE26193, GSE51088, and TCGA dataset.
GSE 9891
Name	Description	GSM249714	GSM249715	GSM249716	GSM249717	GSM249718	GSM249719	GSM249720	GSM249721	GSM249722	GSM249723	GSM249724	GSM249725	GSM249726	GSM249727	GSM249728	GSM249729	GSM249730	GSM249731	GSM249732	GSM249733	GSM249734	GSM249735	GSM249736	GSM249737	GSM249738	GSM249739	GSM249740	GSM249741	GSM249742	GSM249743	GSM249744	GSM249745	GSM249746	GSM249747	GSM249748	GSM249749	GSM249750	GSM249751	GSM249752	GSM249753	GSM249754	GSM249755	GSM249756	GSM249757	GSM249758	GSM249759	GSM249760	GSM249761
YOSHIHARA’S 141-STROMAL SIGNATURE	YOSHIHARA’S 141-STROMAL SIGNATURE	-1725.07	-6251.3	-2778.76	-734.925	61.0004	-1066.28	2467.28	-159.443	-5822.85	-2582.74	-1123.43	-2073.96	1664.49	-1663.09	169.766	-413.896	-1503.48	-2906.49	-2758.72	709.425	283.551	3708.53	-2065.65	4337.16	-6304.96	2776.39	5738.2	1814.81	6095.96	6010.48	-6991.95	5621.19	-4826.3	6190.29	8023.87	1674.64	8014.92	5305.63	1667.43	1243.63	-4956.93	3023.05	1512.86	4157.62	-2540.53	8425.89	1178.66	7657.78
GSE 26193
Name	Description	GSM642933	GSM642934	GSM642935	GSM642936	GSM642937	GSM642938	GSM642939	GSM642940	GSM642941	GSM642942	GSM642943	GSM642944	GSM642945	GSM642946	GSM642947	GSM642948	GSM642949	GSM642950	GSM642951	GSM642952	GSM642953	GSM642954	GSM642955	GSM642956	GSM642957	GSM642958	GSM642959	GSM642960	GSM642961	GSM642962	GSM642963	GSM642964	GSM642965	GSM642966	GSM642967	GSM642968	GSM642969	GSM642970	GSM642971	GSM642972	GSM642973	GSM642974	GSM642975	GSM642976	GSM642977	GSM642978	GSM642979	GSM642980
YOSHIHARA’S 141-STROMAL SIGNATURE	YOSHIHARA’S 141-STROMAL SIGNATURE	2351.97	-4298.74	1717.83	2136.34	3237.81	4003.87	-1570.69	-992.364	-635.938	4496.41	-1047.95	5550.17	2052.17	5336.49	6134.44	-333.695	7529.13	-983.725	1502.2	-828.2	7134.87	-268.794	14.4475	-908.851	-2872.4	-2437.76	-4816.86	1427.27	345.529	-525.605	-1343.06	2757.05	-860.994	-1437.74	-1980.52	-663.554	6258.04	-4743.93	1196.21	-159.508	-2449.37	-1217.93	-2186.68	-4155.34	-3597.99	4434.5	5794.98	-438.607
TCGA dataset
Name	Description	TCGA-01-0628-11A-01R-0362-01	TCGA-01-0630-11A-01R-0362-01	TCGA-01-0631-11A-01R-0362-01	TCGA-01-0633-11A-01R-0362-01	TCGA-01-0636-11A-01R-0362-01	TCGA-01-0637-11A-01R-0362-01	TCGA-01-0639-11A-01R-0362-01	TCGA-01-0642-11A-02R-0362-01	TCGA-04-1331-01A-01R-0434-01	TCGA-04-1332-01A-01R-0434-01	TCGA-04-1335-01A-01R-0434-01	TCGA-04-1336-01A-01R-0434-01	TCGA-04-1337-01A-01R-0434-01	TCGA-04-1338-01A-01R-0434-01	TCGA-04-1341-01A-01R-0434-01	TCGA-04-1342-01A-01R-0434-01	TCGA-04-1343-01A-01R-0434-01	TCGA-04-1346-01A-01R-0434-01	TCGA-04-1347-01A-01R-0434-01	TCGA-04-1348-01A-01R-0453-01	TCGA-04-1349-01A-01R-0453-01	TCGA-04-1350-01A-01R-0453-01	TCGA-04-1351-01A-01R-0453-01	TCGA-04-1353-01A-01R-1048-01	TCGA-04-1356-01A-01R-0453-01	TCGA-04-1357-01A-01R-0453-01	TCGA-04-1360-01A-01R-0453-01	TCGA-04-1361-01A-01R-0453-01	TCGA-04-1362-01A-01R-0453-01	TCGA-04-1364-01A-01R-0453-01	TCGA-04-1365-01A-01R-0453-01	TCGA-04-1367-01A-01R-0453-01	TCGA-04-1369-01A-02R-1048-01	TCGA-04-1371-01A-01R-0453-01	TCGA-04-1514-01A-01R-0502-01	TCGA-04-1516-01A-01R-1048-01	TCGA-04-1517-01A-01R-0538-01	TCGA-04-1519-01A-01R-0538-01	TCGA-04-1525-01A-01R-0538-01	TCGA-04-1530-01A-02R-0502-01	TCGA-04-1536-01A-01R-0538-01	TCGA-04-1542-01A-01R-0502-01	TCGA-04-1638-01A-01R-0582-01	TCGA-04-1644-01B-01R-1048-01	TCGA-04-1646-01A-01R-0582-01	TCGA-04-1648-01A-01R-0582-01	TCGA-04-1649-01A-01R-0582-01	TCGA-04-1651-01A-01R-0582-01
YOSHIHARA’S 141-STROMAL SIGNATURE	YOSHIHARA’S 141-STROMAL SIGNATURE	-810.855	-448.256	80.5943	1155.84	-965.389	-669.93	-1166.62	-99.4581	-917.201	609.09	-2592.49	-2580.08	867.146	456.802	-1668.51	-1061.04	-479.407	-1413.95	-1842	-1460.67	-582.408	-3211.64	-1707.44	-1952.61	-1785.2	430.335	-2087.54	-1171.1	-2032.05	-3466.49	-1417.09	-2761.36	-830.805	-3438.81	-2382.19	-1721.75	-2541.62	-2887.66	-2197.19	556.991	-2022.47	-2571.34	-2817	-2387.35	-2682.64	-2032.54	-2850.85	-2903.44
GSE 51088
Name	Description	GSM1238145	GSM1238146	GSM1238147	GSM1238148	GSM1238149	GSM1238150	GSM1238151	GSM1238152	GSM1238153	GSM1238154	GSM1238155	GSM1238156	GSM1238157	GSM1238158	GSM1238159	GSM1238160	GSM1238161	GSM1238162	GSM1238163	GSM1238164	GSM1238165	GSM1238166	GSM1238167	GSM1238168	GSM1238169	GSM1238170	GSM1238171	GSM1238172	GSM1238173	GSM1238174	GSM1238175	GSM1238176	GSM1238177	GSM1238178	GSM1238179	GSM1238180	GSM1238181	GSM1238182	GSM1238183	GSM1238184	GSM1238185	GSM1238186	GSM1238187	GSM1238188	GSM1238189	GSM1238190	GSM1238191	GSM1238192
YOSHIHARA’S 141-STROMAL SIGNATURE	YOSHIHARA’S 141-STROMAL SIGNATURE	-6791.73	-2719.71	-6085.03	-4705.16	-7146.84	-4422.91	-1766	-593.461	-6363.55	-136.091	-888.34	-1928.36	-1949.95	-5833.15	816.379	3731.7	416.029	-5408.25	-322.506	-3725.46	3505.76	-1518.13	-6904.36	1439.34	1142.24	-1827	4075.5	-6905.37	5439.63	4811.9	-4916.15	1583.71	-1304.3	-6460.9	-5089.04	-7094.83	-4992.77	1695.67	-4672.17	-5292.12	-1312.81	-4198.97	1709.01	-2314.53	-1278.89	4744.02	-2000.73	-1191.41
[truncated: 546 more columns]
